# Supplementary material for: La Mancha espera crecer un 5% en exportación
Source: Royal Society of Chemistry journal article supplement (doi:10.1039/c1ob05172e), 2011-01-01

## Supporting Information for publication

### Synthesis of Oxabicyclo [3.3.1]nonenes and Substituted Tetrahydropyrans via (3,5)-Oxonium-Ene Reaction

Pipas Saha, Paramartha Gogoi and Anil K. Saikia\*

**Supplementary Information:** General experimental Procedure and  $^1\text{H}$  and  $^{13}\text{C}$  NMR spectra of all compounds &  $^{19}\text{F}$  NMR of **3d**, NOE spectrum of **3a**, **4e** & **15**, COSY spectrum of **15**.

**General Experimental Section:**  $^1\text{H}$  NMR spectra were recorded in  $\text{CDCl}_3$  on 400 MHz NMR spectrometer using TMS as internal standard. The  $^{13}\text{C}$  and  $^{19}\text{F}$  NMR spectra were recorded at 100 MHz and 376 MHz, respectively. For  $^{13}\text{C}$  and  $^{19}\text{F}$  NMR  $\text{CDCl}_3$  and  $\text{C}_6\text{F}_6$  were used as internal standard. IR spectra were recorded on FT-IR spectrometer. Ratios of the compounds were determined from  $^1\text{H}$  NMR signals of crude products. Only the well separated signals, irrespective of its chemical shift value, were used for these determinations. The spectra were expanded while calculating the ratios. Mass spectra were recorded using Waters LC-MS/MS system (Q-TOF–Premier). HRMS (ESCI-TOF) were calibrated with sodium formate solution and leucine enkephalin (SIGMA) was used as an external standard.

<sup>1</sup>H NMR spectra of 3a

```

PS_286_M
exp1 s2pu1
date SAMPLE 4.2011 temp not used
solvent Mar CDC13 gain not used
file CDC13 not used
exp hst not used
sw ACQUISITION exp hst 6.008
pwr 6389.8 pw90 19.700
at 1.998 alfa 20.000
np not used il n
fb not used il n
bs 8 in n
di 1.000 dp in y
nt 250 hs
ct TRANSMITTER 178 lb PROCESSING 0.10
fn 65536
sfrq 399.853 fn DISPLAY
tof 362.8 sp -183.3
tpwr 57 wp 4399.7
pw DECOUPLER 9.850 rfl 796.2
dn C13 rp 113.0
dof u tp -96.4
dgm n n C 250
dmw C 50
dwr VS 49
dmf 15900 th cdc ph 14
    
```

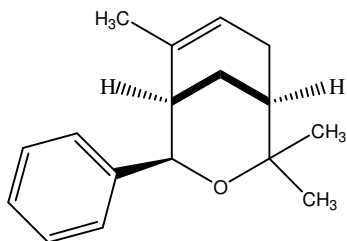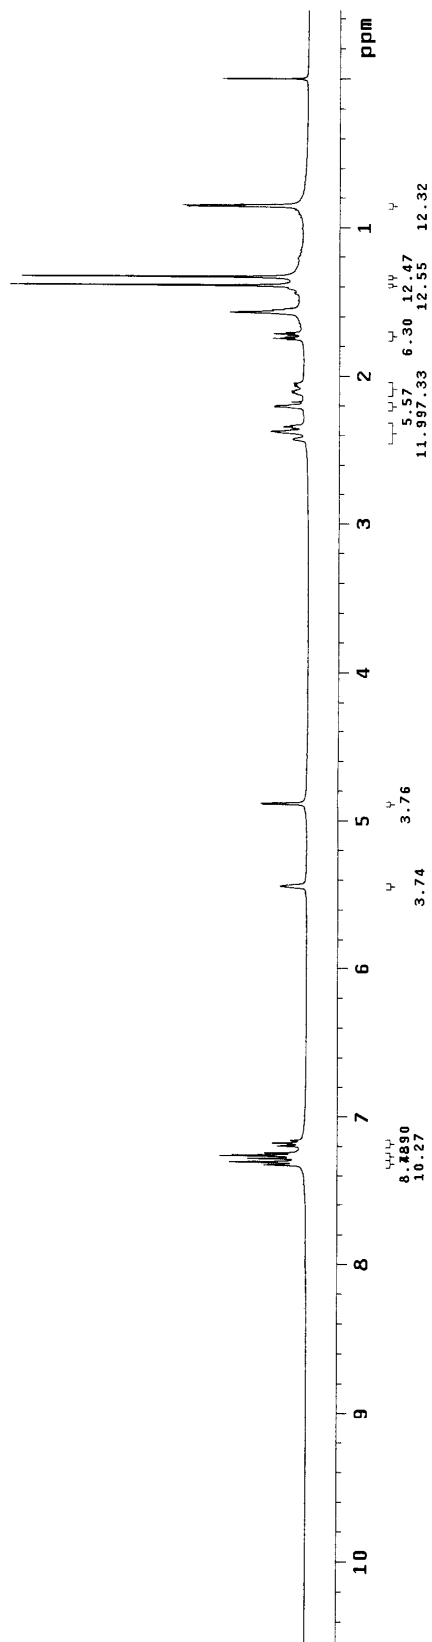

<sup>13</sup>C NMR spectra of 3a

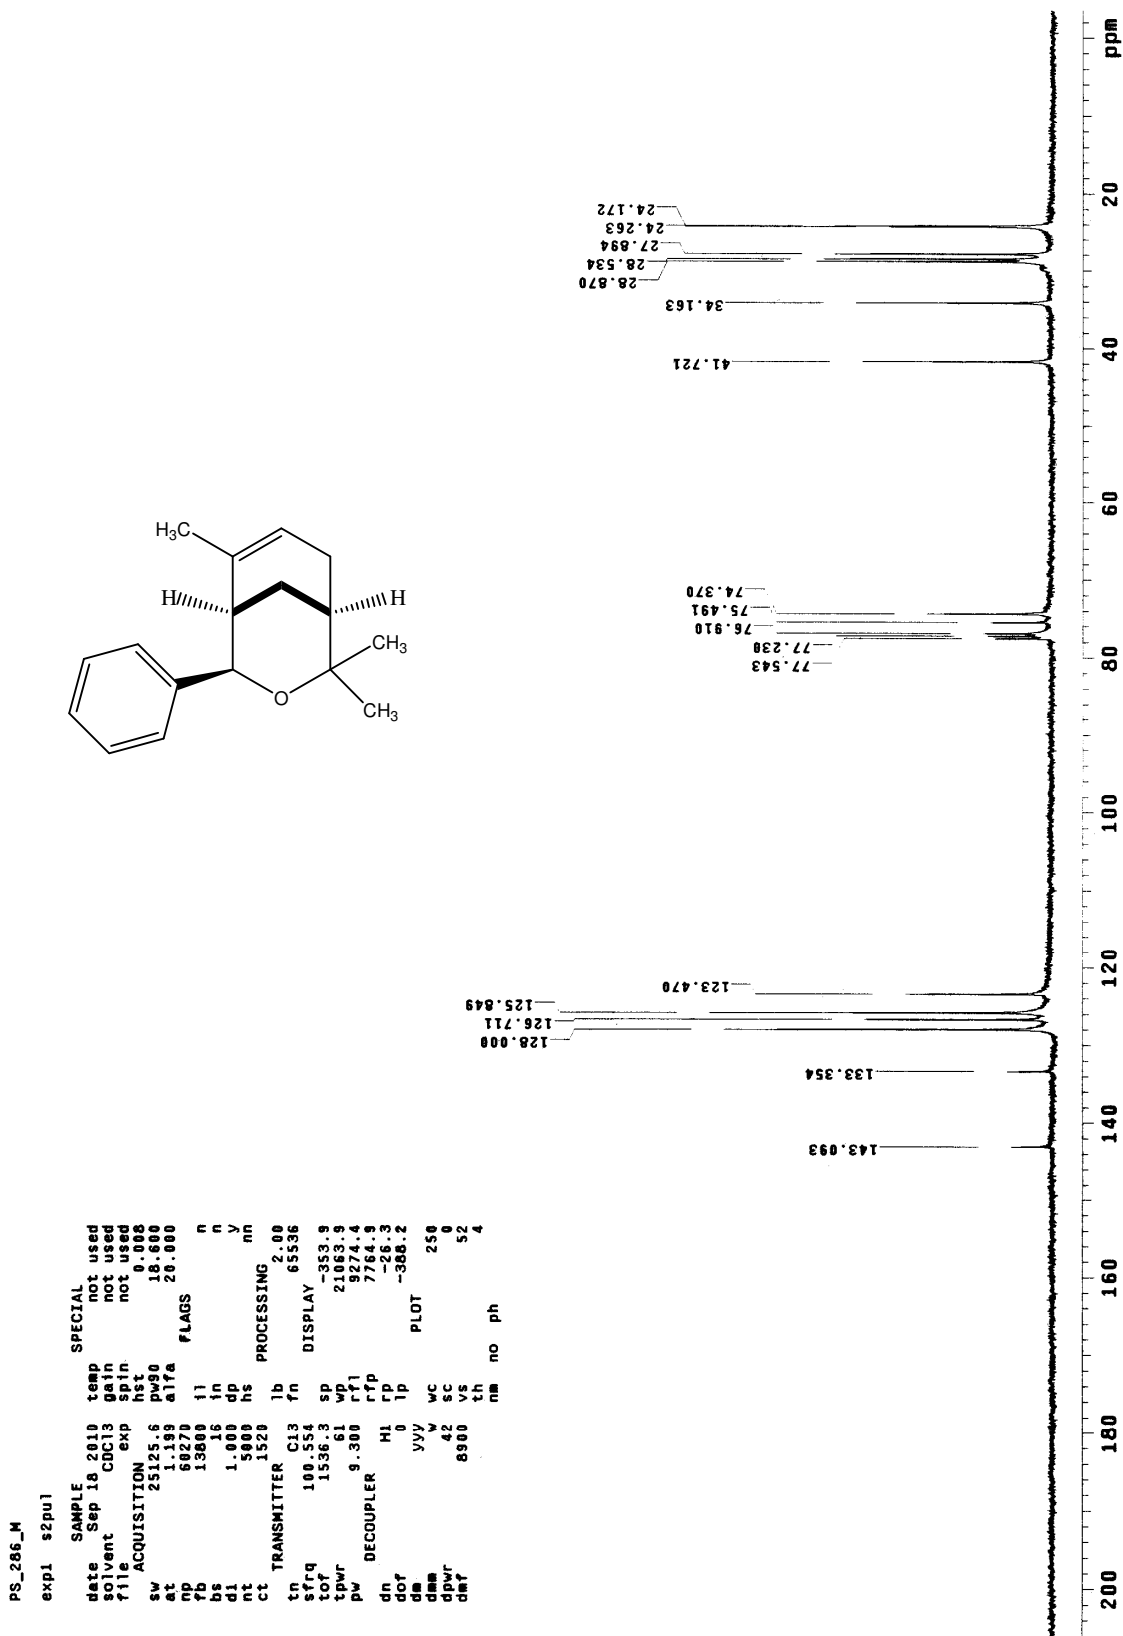

<sup>1</sup>H NMR spectra of 3b

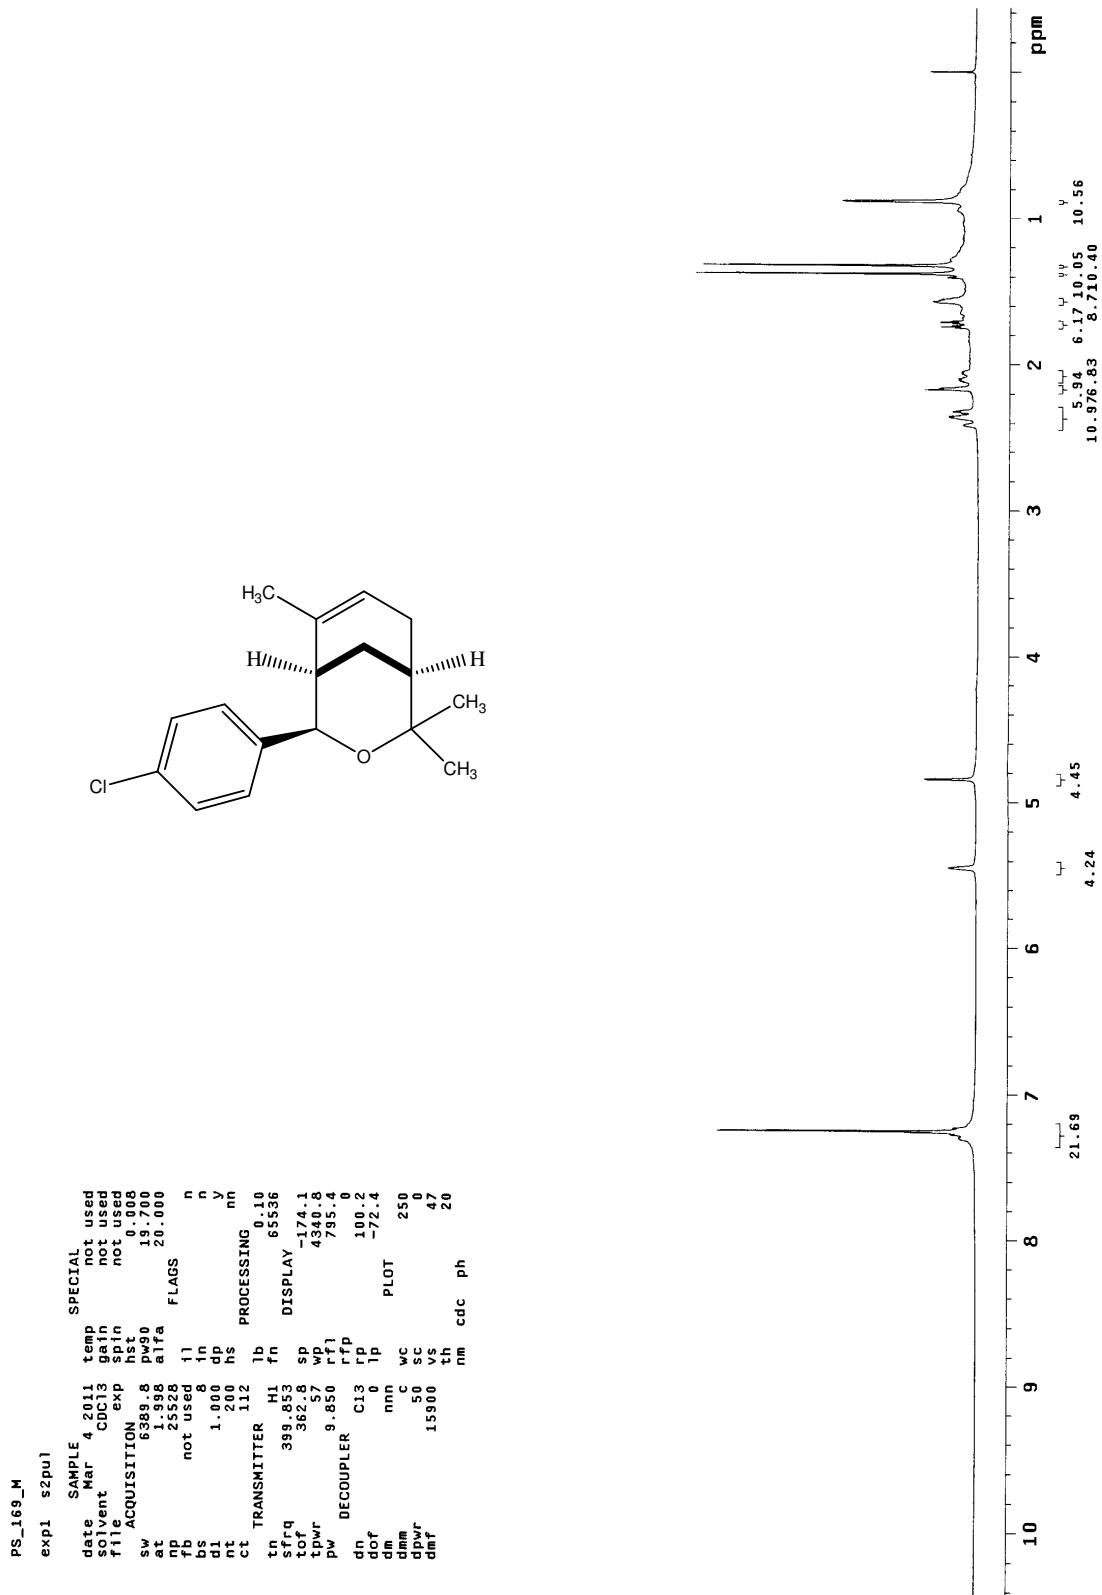

<sup>13</sup>C NMR spectra of 3b

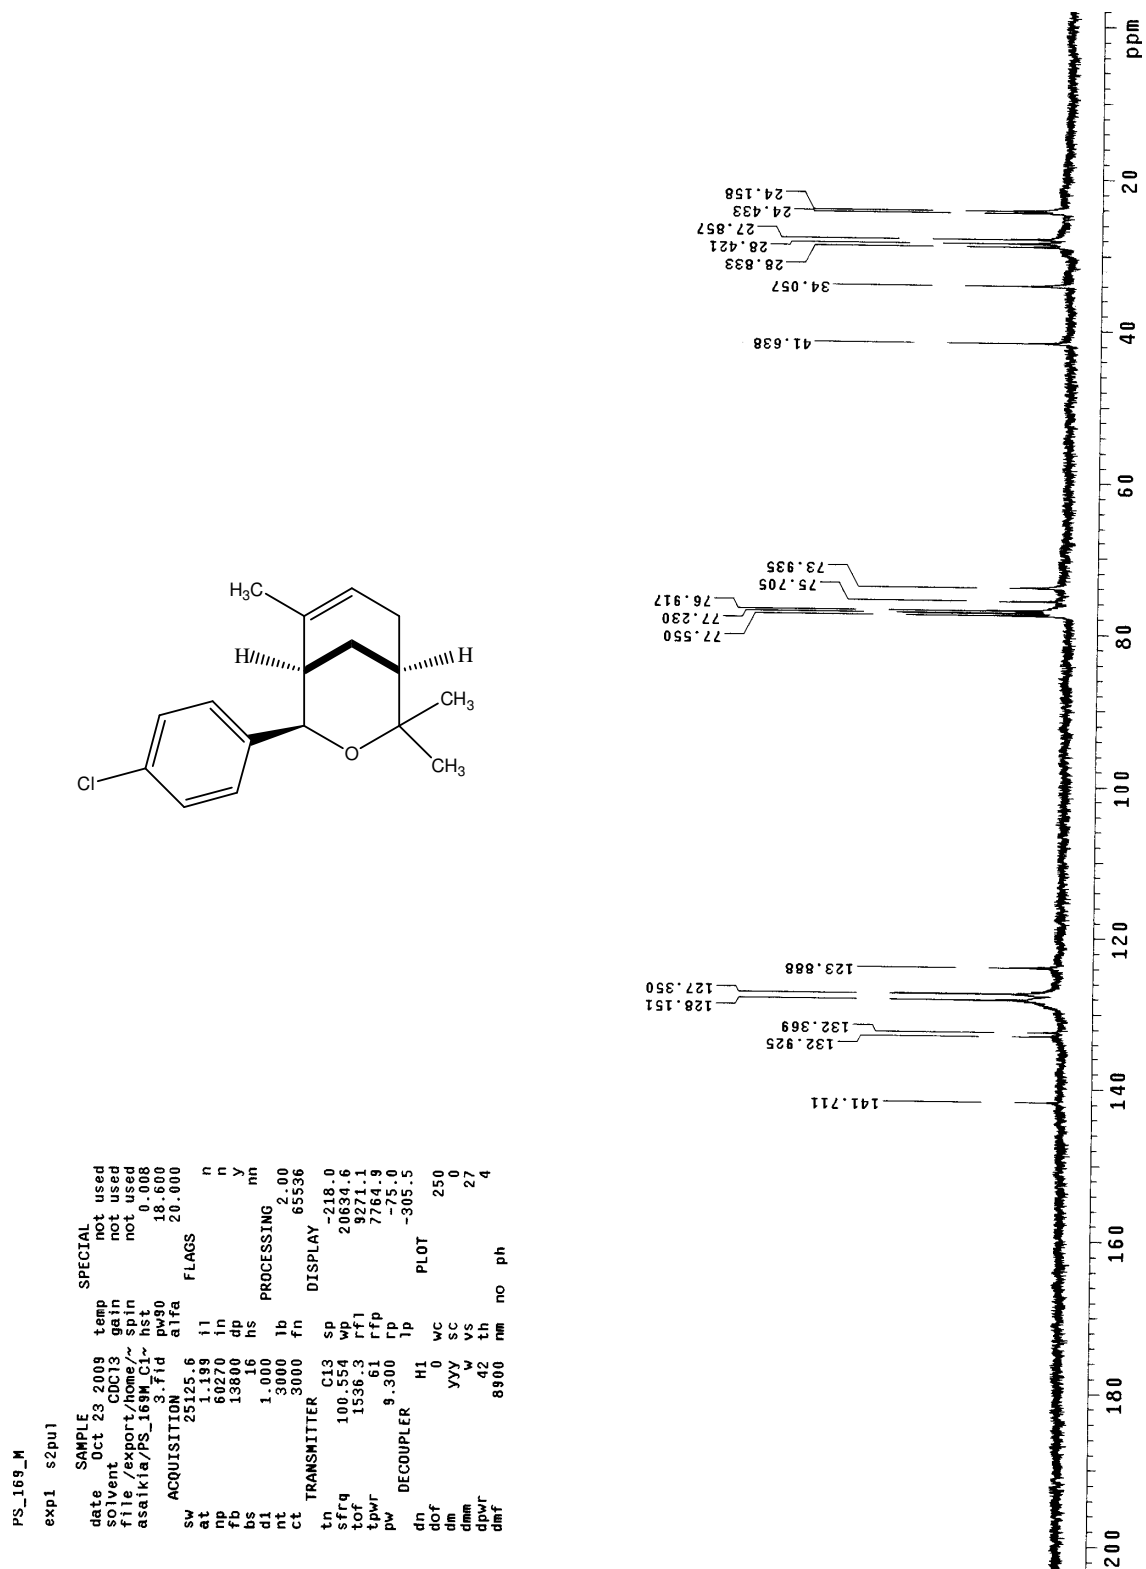

### <sup>1</sup>H NMR spectra of 3c

```
PS_167_M
exp1 s2pu1
date 7 2011
solvent Mar CDC13
file CDC13
acq file exp
sv 636.8
sw 19.700
nd 25528
fb not used
bs 8
di 1.000
nt 200
ct TRANSMITTER 120
tn 399.853
sfrq 362.8
tof 4315.7
tpwr 9.850
pw DECOUPLER C13
dn 0
dm nnn
dim 250
dipw 50
dmf 15900
nm cdc
ph 20
temp not used
gain not used
spn not used
nst 0.008
puls 19.700
a1ra 20.000
SPECIAL
  n
  y
  nn
  0.10
  65536
  DISPLAY
  -157.7
  4315.7
  795.8
  0
  129.7
  -89.9
  250
  50
  20
  20
  nm cdc ph
```

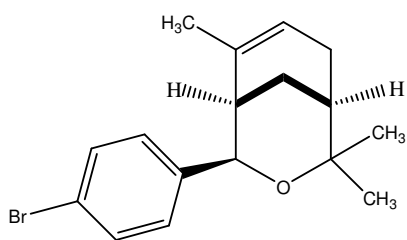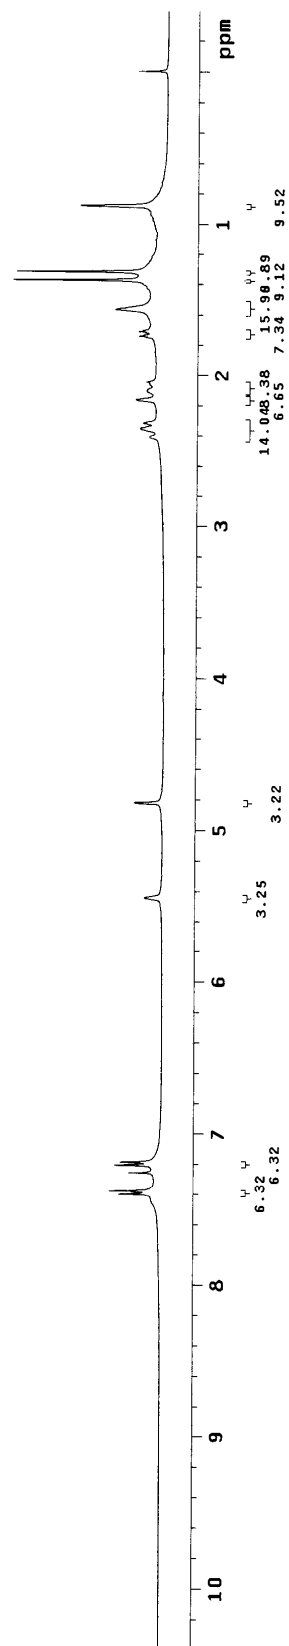

<sup>13</sup>C NMR spectra of 3c

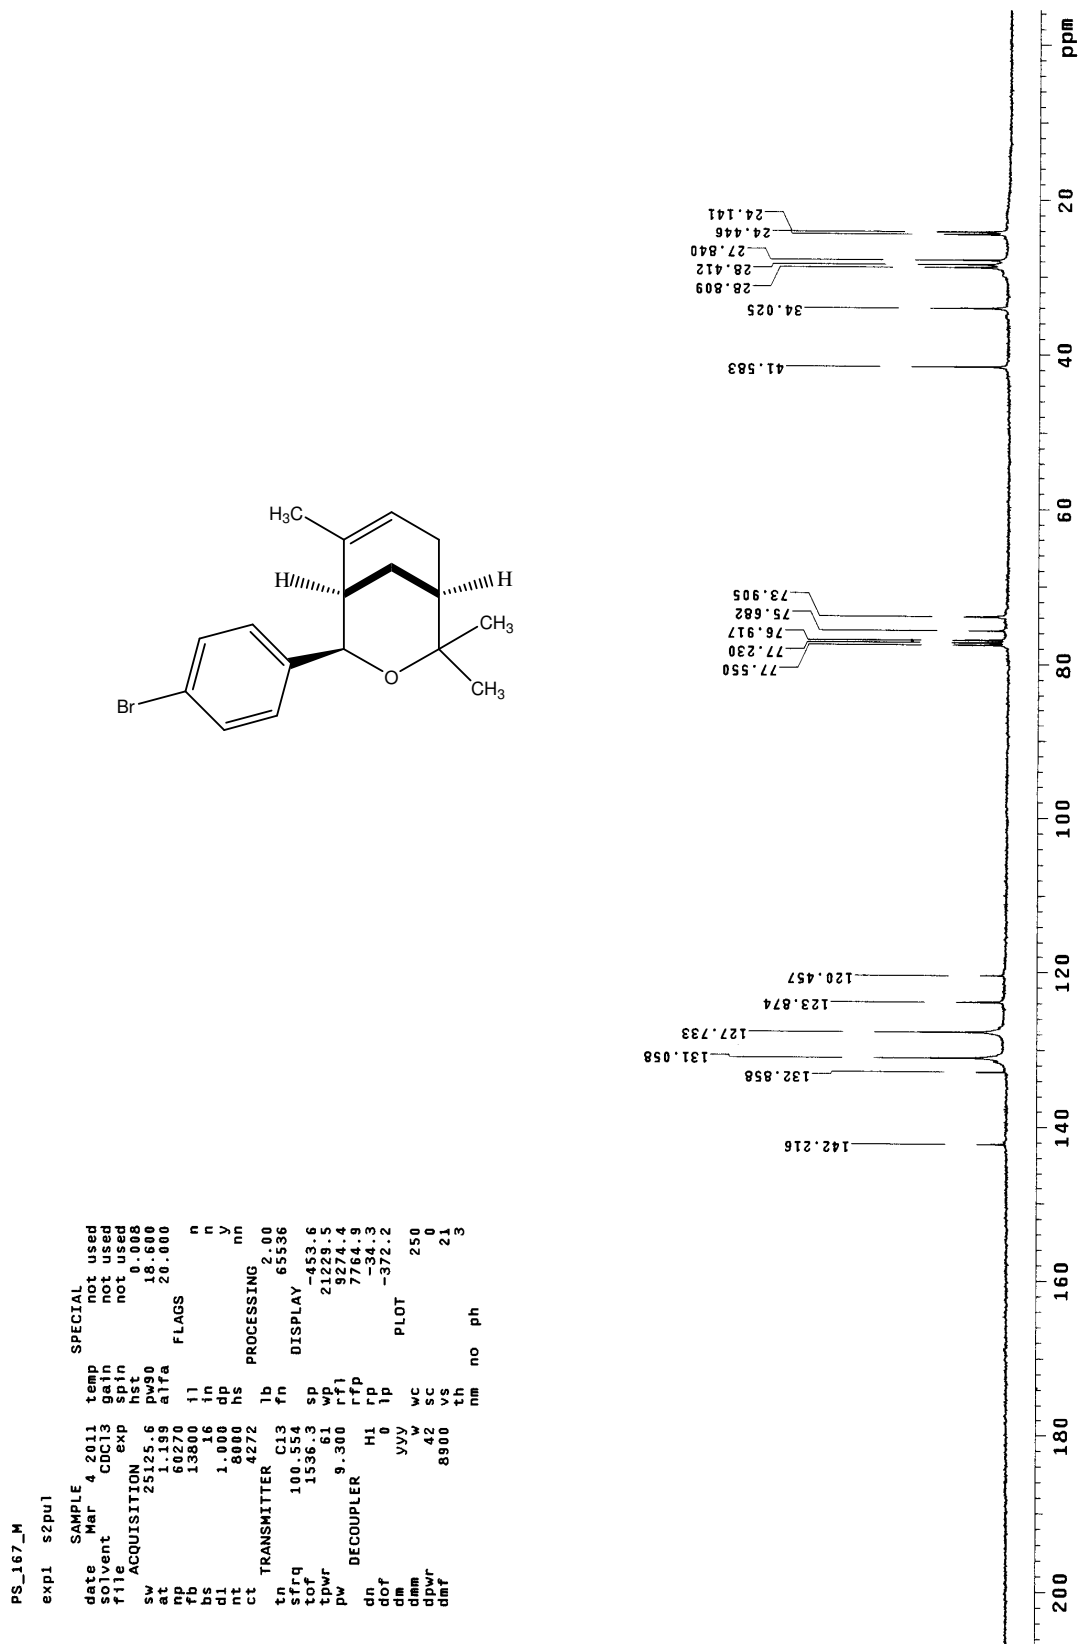





<sup>13</sup>C NMR spectra of 3d

```

PS_170_M
exp2 s2pu1
SAMPLE
date Oct 25 2009
solvent CDCl3
file
ACQUISITION
sw 25125.6
at 1.199
fb 60270
fb 13800
d1 16
d1 1.000
nt 10000
ct 3936
SPECIAL
temp not used
gain not used
ht not used
ht 0.008
pw 18.600
a1fa 20.000
FLAGS
n
n
y
nn
PROCESSING
lb 2.00
fn 65536
DISPLAY
sp -251.7
wp 20700.6
rf1 9271.8
rfp 7764.9
rfp -61.5
lp -314.8
PLOT
wc 250
sc 0
vs 47
th nm no ph
    
```

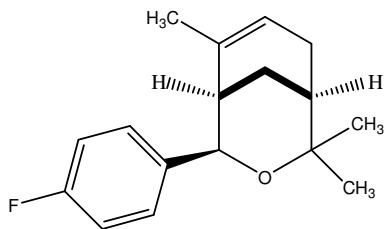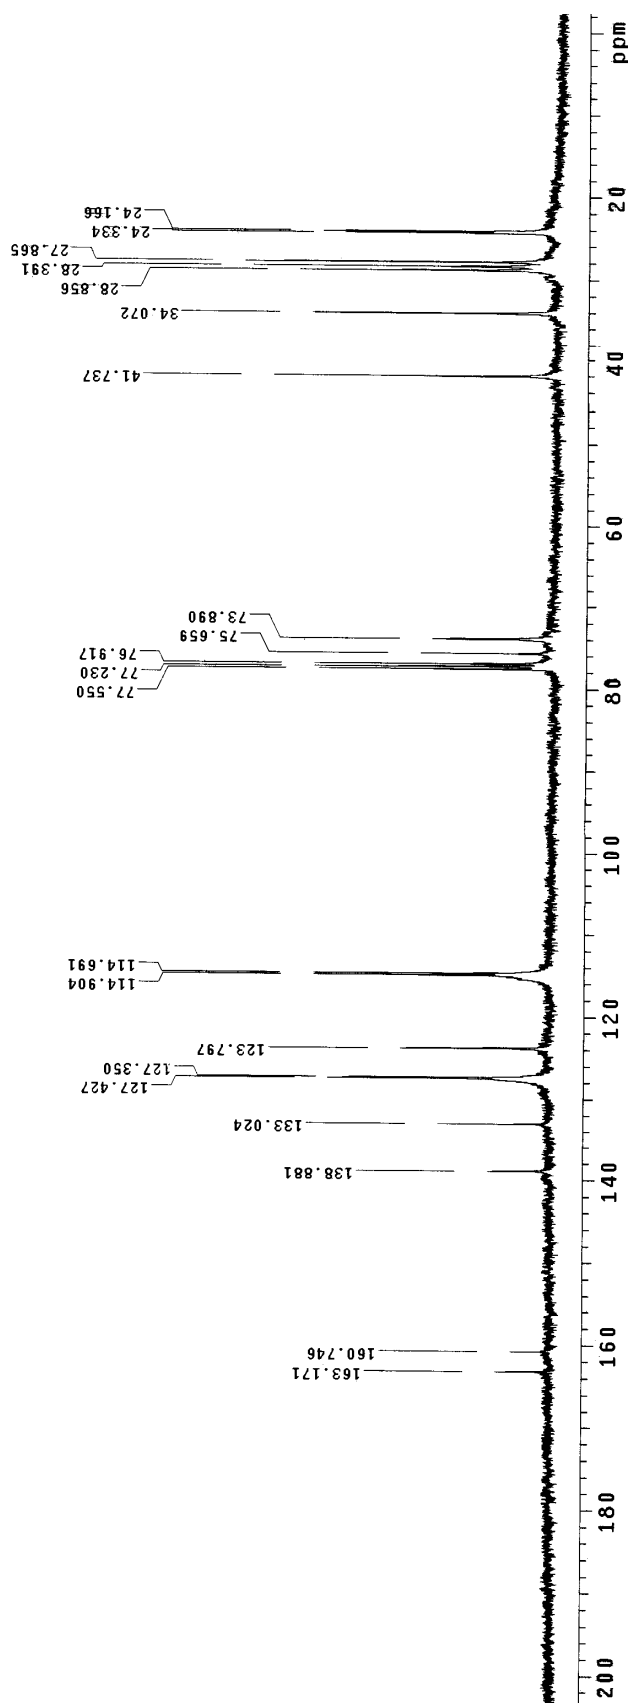

<sup>19</sup>F NMR spectra of 3d

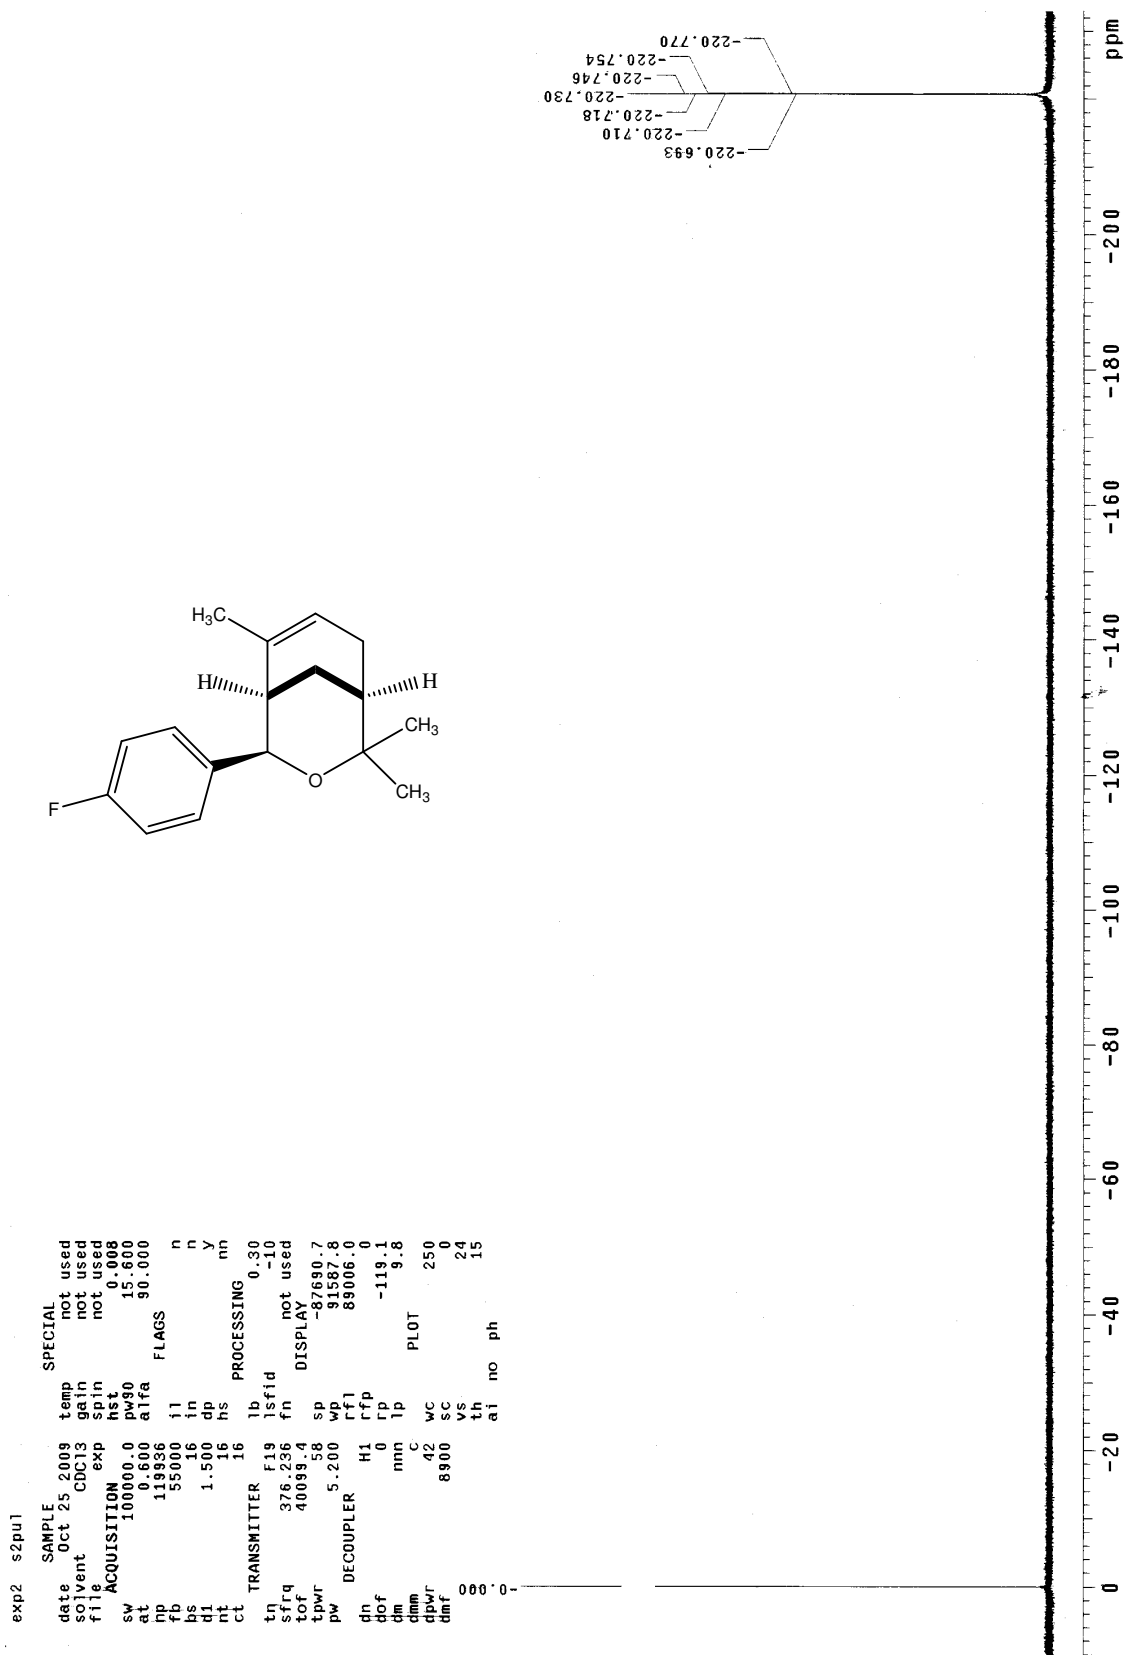

<sup>1</sup>H NMR spectra of 3e

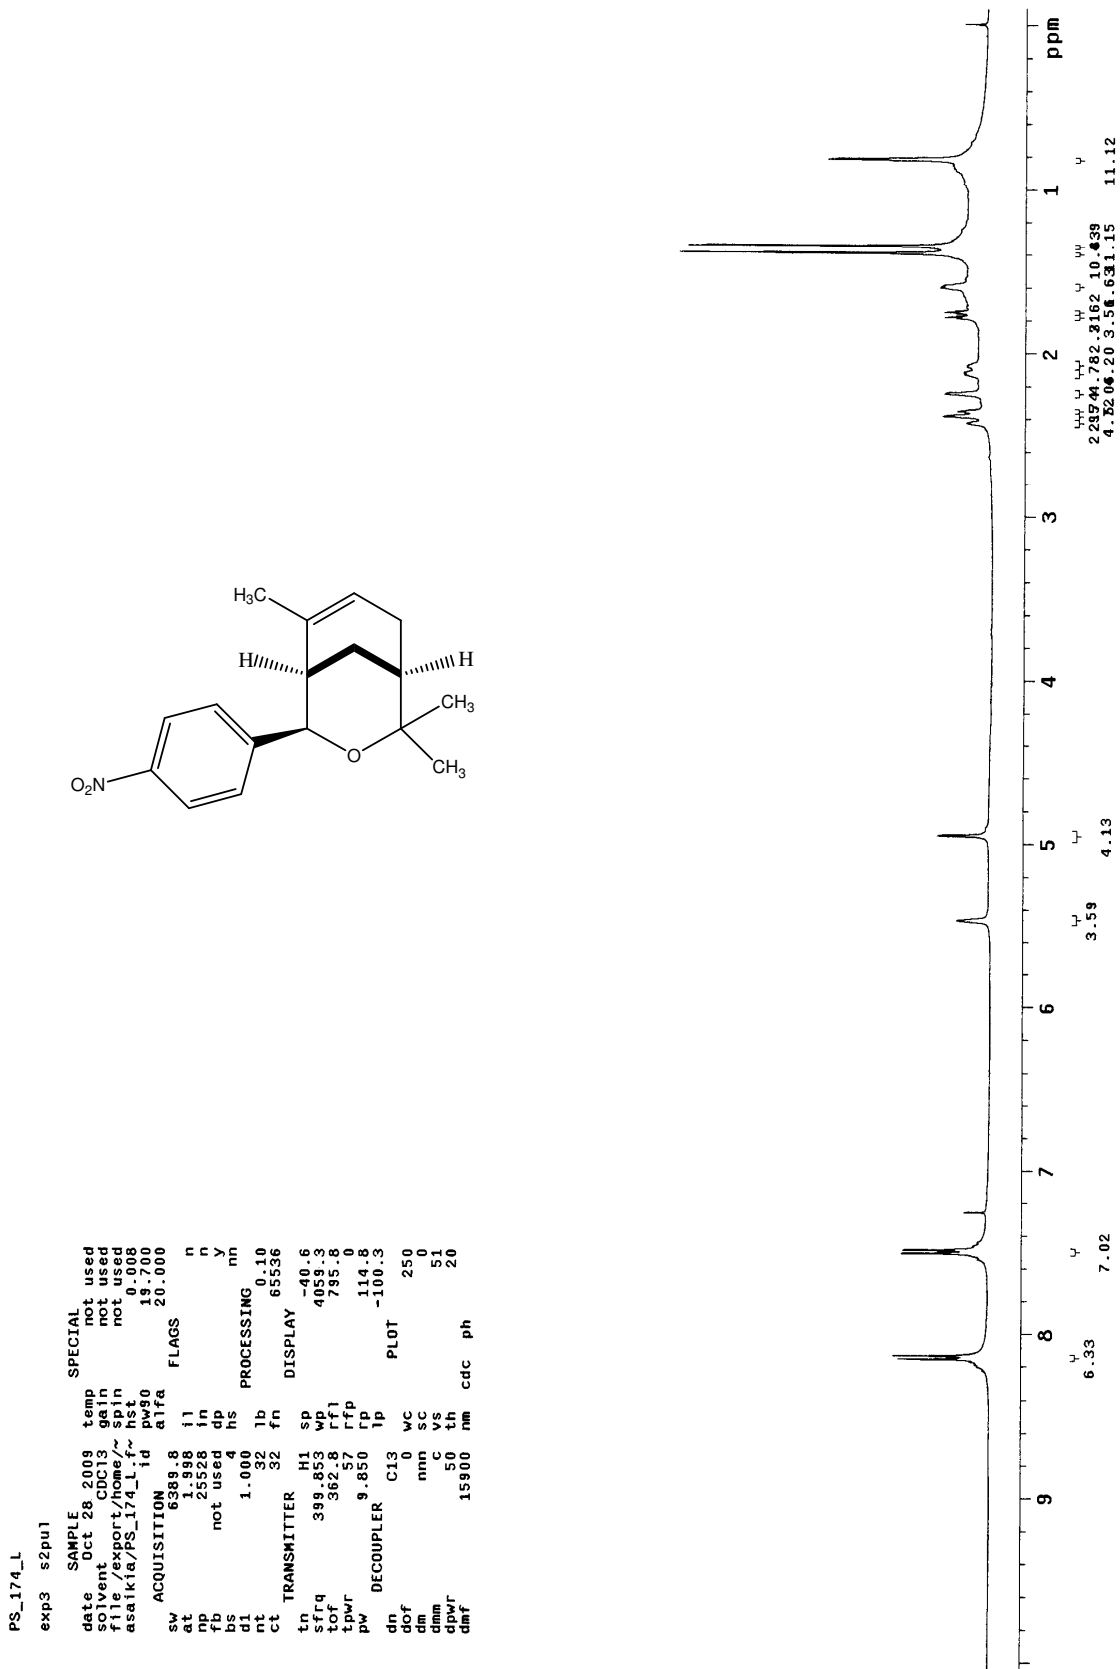

<sup>13</sup>C NMR spectra of 3e

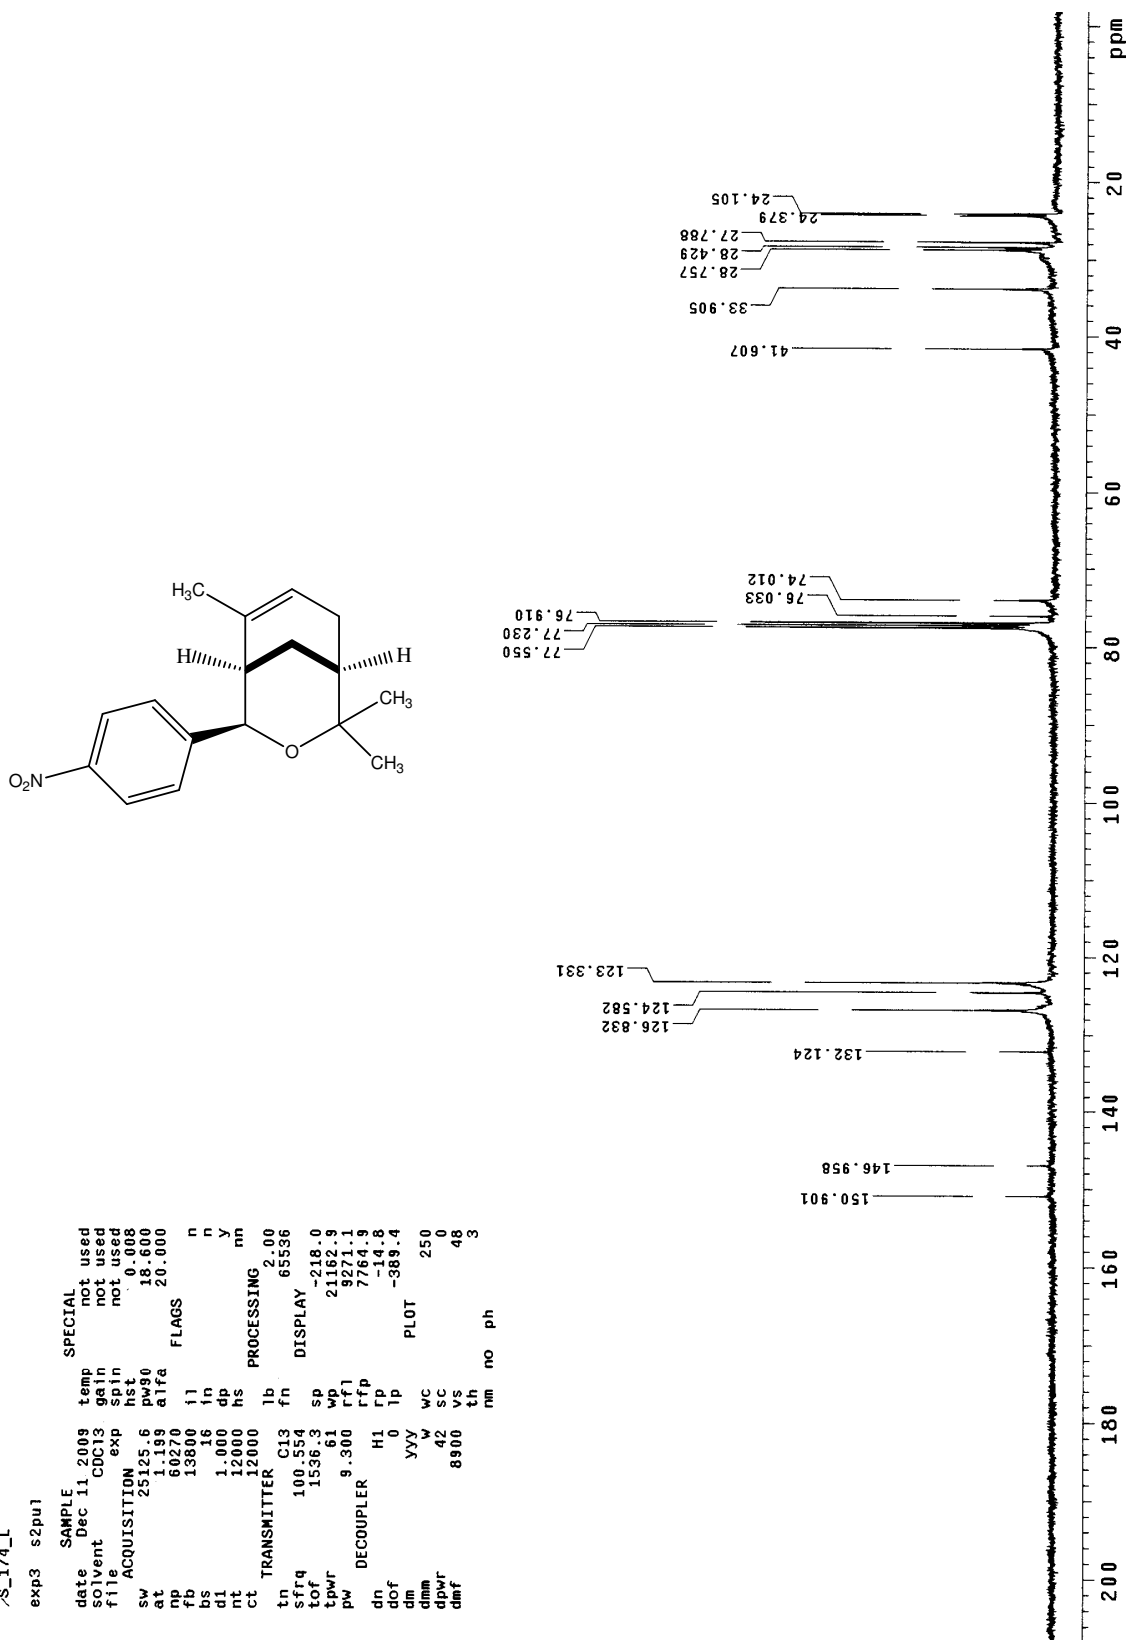

### <sup>1</sup>H NMR spectra of 3f

```

PS_175_M
exp3 s2pu1
SAMPLE SPECIAL
date Oct 28 2009 temp not used
solvent CDCl3 gain not used
file /export/home/~ hst not used
asaikia/PS_175_M.f~ hst 0.008
pw90 13.700
alifa 20.000
ACQUISITION FLAGS
sw 6389.8 il n
at 1.958 in n
rp 25528 dn y
bs not used dp n
d1 1.000 hs
nt 32 lb 0.10
ct 32 fn 65536
TRANSMITTER H1 sp
tn 399.853 wp -122.3
tof 362.8 rfl 4206.4
tpwr 57 rfp 794.0
pw 9.850 rp 120.7
DECOUPLER C13 lp -93.7
dn 250
dof de wc 0
dmn mn sc 60
dppr c th vs 58
dmf 15900 nm cdc ph
    
```

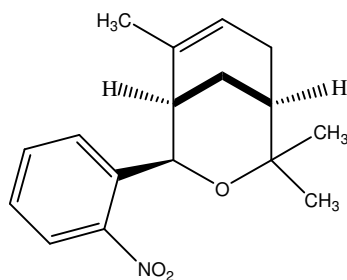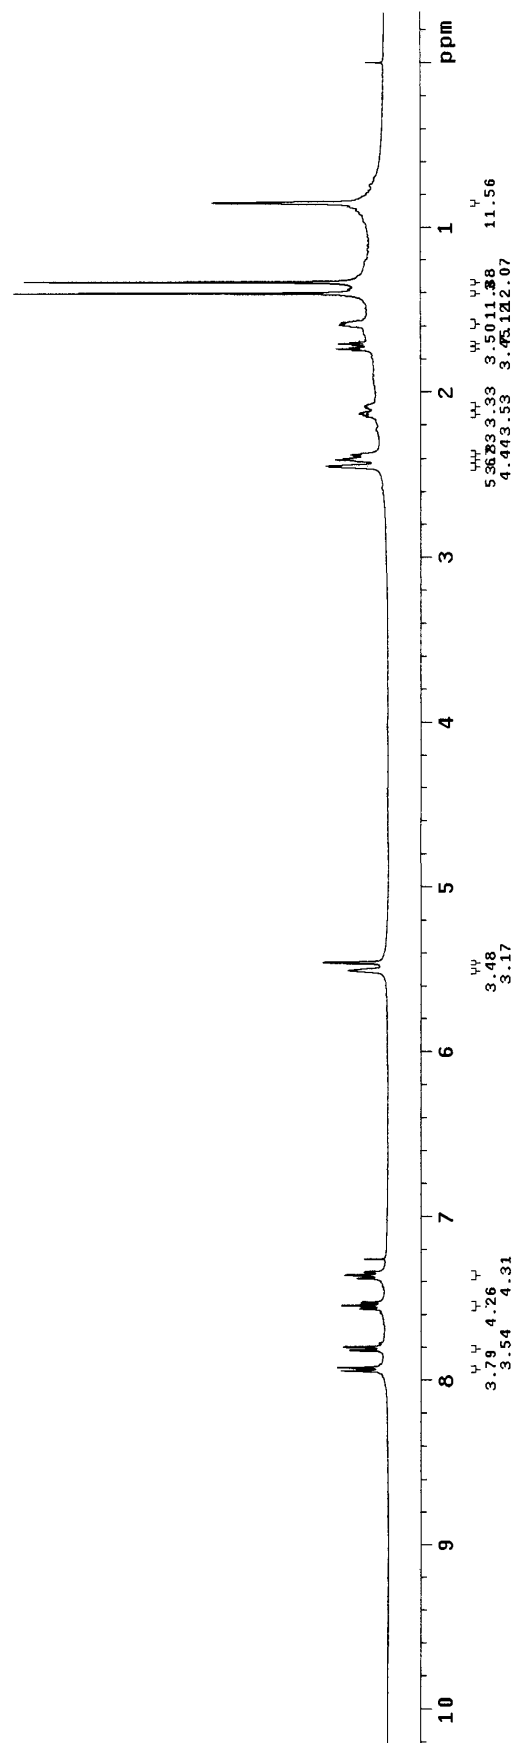

<sup>13</sup>C NMR spectra of 3f

```

PS_175_M
exp3 s2pu1
SAMPLE
date Oct 28 2009 temp not used
solvent cdc13 gain not used
file /export/home/~ gain not used
asa1/a/PS_175M C1~ hst 0.008
ACQUISITION 18.800 pu80
sw 25125.6 a1fa 20.000
at 1.189 11 n
np 60270 1n n
fb 19800 dp y
bs 18 hs nn
d1 1.000 1b
nt 3000 1b
ct 3000 fn 65536
TRANSMITTER C13 sp -256.3
sfrq 100.554 wp 20733.6
tof 1536.3 rfl 9276.4
tpwr 61 rfp 7764.9
pw 9.300 rp -27.7
DECOUPLER H1 lp -395.5
dn 0 WC 250
dof 0 VVY SC 0
dm 0 W VS 35
dmm 42 th nm no ph
dpr 8900
dmr
    
```

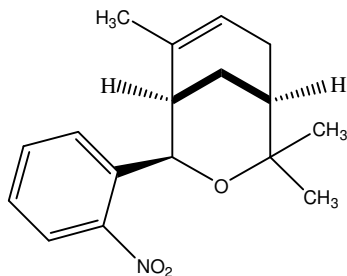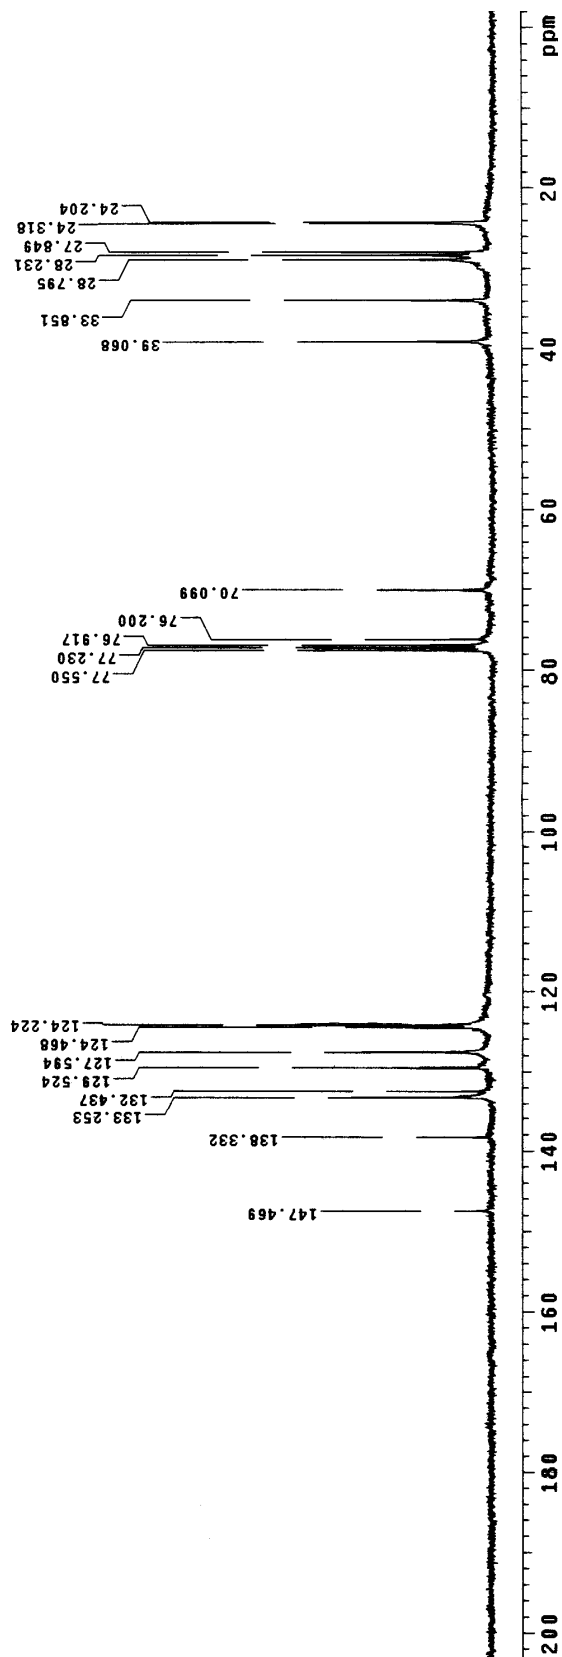

# <sup>1</sup>H NMR spectra of 3g

```
PS_163M_Pdt
exp2 s2pu1
date Oct 17 2009
file CDC13
solvent exp
ACQUISITION
sw 6389.8
dt 1.998
rp 25528
fb not used
l1 4
l2 4
l3 1.002
l4 32
ct 32
TRANSMITTER H1
tn 0.10
sfrq 399.853
tof 65536
tpwr 362.8
pw 57
DECOUPLER C13
dn 9.850
dncf 0
dimm 0
dpmr 0
dimf 15900
nm cdc ph
```

```
SPECIAL
temp not used
gain not used
spin not used
hst 0.008
pw90 19.700
alfa 20.000
n
y
nm
PROCESSING
lb 0.10
fn 65536
DISPLAY
sp -199.3
wp 4424.8
rf1 812.4
rfp 0
rp 108.9
lp -84.2
WC 250
SC 0
VS 69
TH 18
```

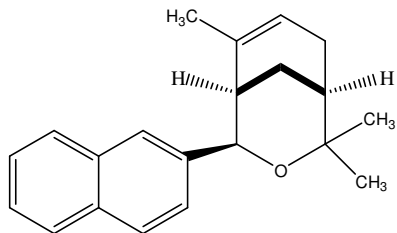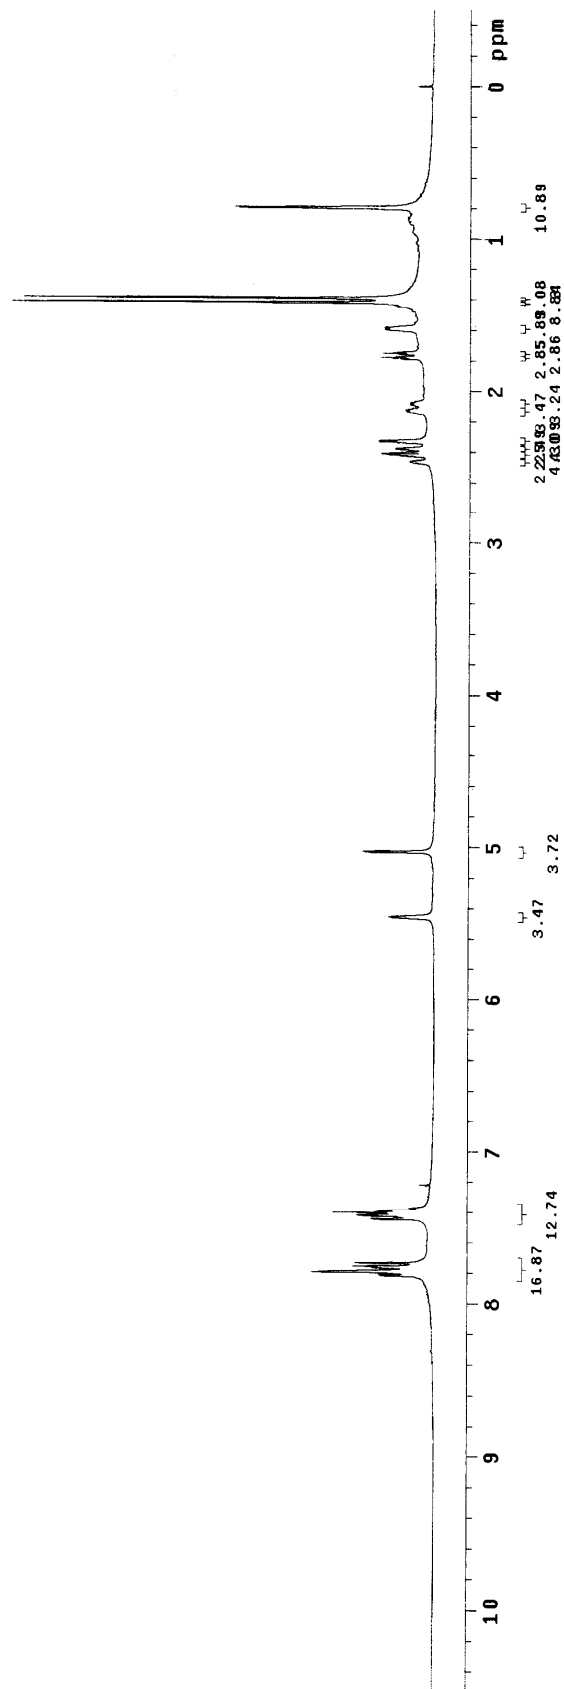

<sup>13</sup>C NMR spectra of 3g

```

PS_163M_Pdt
exp2 s2pu1
SAMPLE
date Oct 17 2009
solvent CDCl3
file not used
ACQUISITION
sw 25125.6
at 1.199
np 60270
fb 13800
bs 16
d1 1.000
nt 3000
ct 1056
SPECIAL
temp not used
gain not used
spin not used
hst 0.008
pw90 18.600
alpha 20.000
FLAGS
n
n
y
nn
PROCESSING
lb 2.00
fn 65536
DISPLAY
-487.9
21327.8
9276.4
7764.9
-67.2
-304.5
DECOUPLER
HI
dof 0
dmm yvy
dpm w
dpwr 42
dnt 8300
nm no ph
    
```

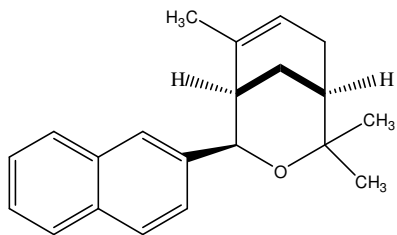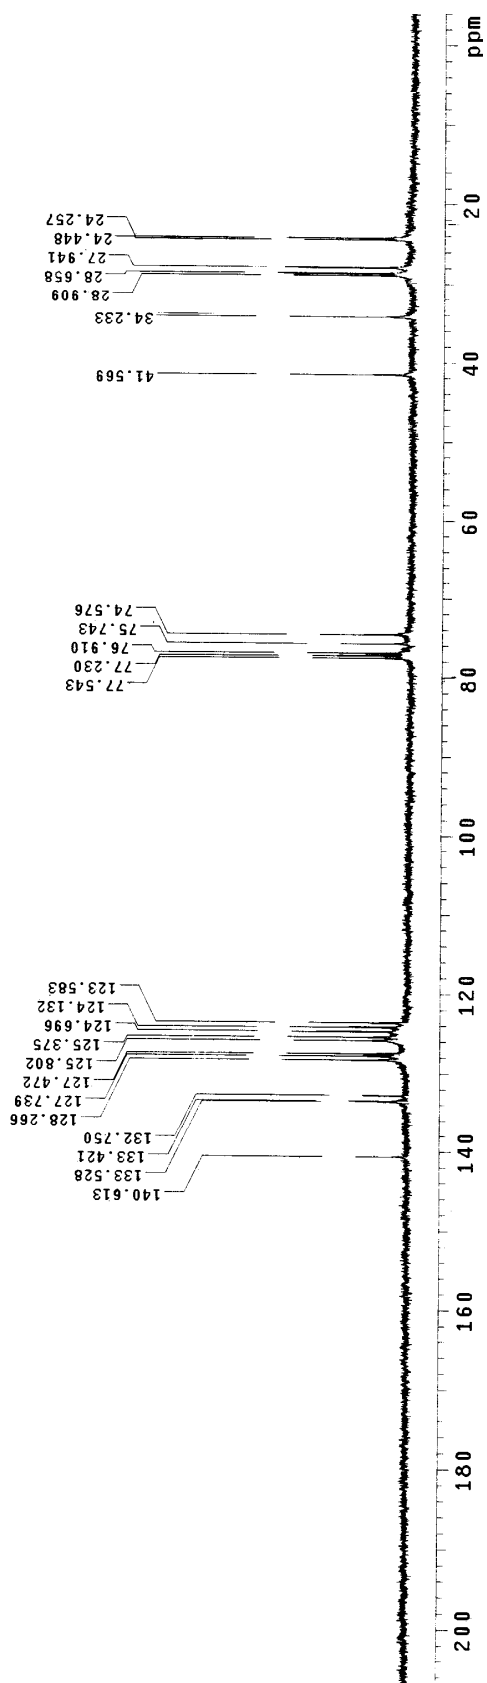





<sup>13</sup>C NMR spectra of 3h

```

PS_300_U
exp1 s2pu1
SAMPLE
date Jun 9 2010
solvent CDCl3
file
ACQUISITION exp
sw 25125.6
at 1.199
np 60270
fb 13800
d1 16
d1 1.000
nt 4000
ct 2752
TRANSMITTER C13
tn 65536
sfrq 100.554
tof 1536.3
tpwr 61
pw 9.300
DECOUPLER H1
dn 0
dof 0
dm VVY
dmm w
dpm 42
dmf 8900
nm no ph
SPECIAL
temp not used
gain not used
spin not used
hst 0.008
pws0 18.600
alt0 20.000
FLAGS
n
y
nn
PROCESSING
lb 2.00
fn 65536
DISPLAY
-681.4
21328.5
9271.3
7764.9
-22.8
-331.8
PLOT
wc 250
sc 0
vs 32
th 5
    
```

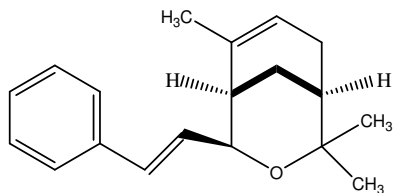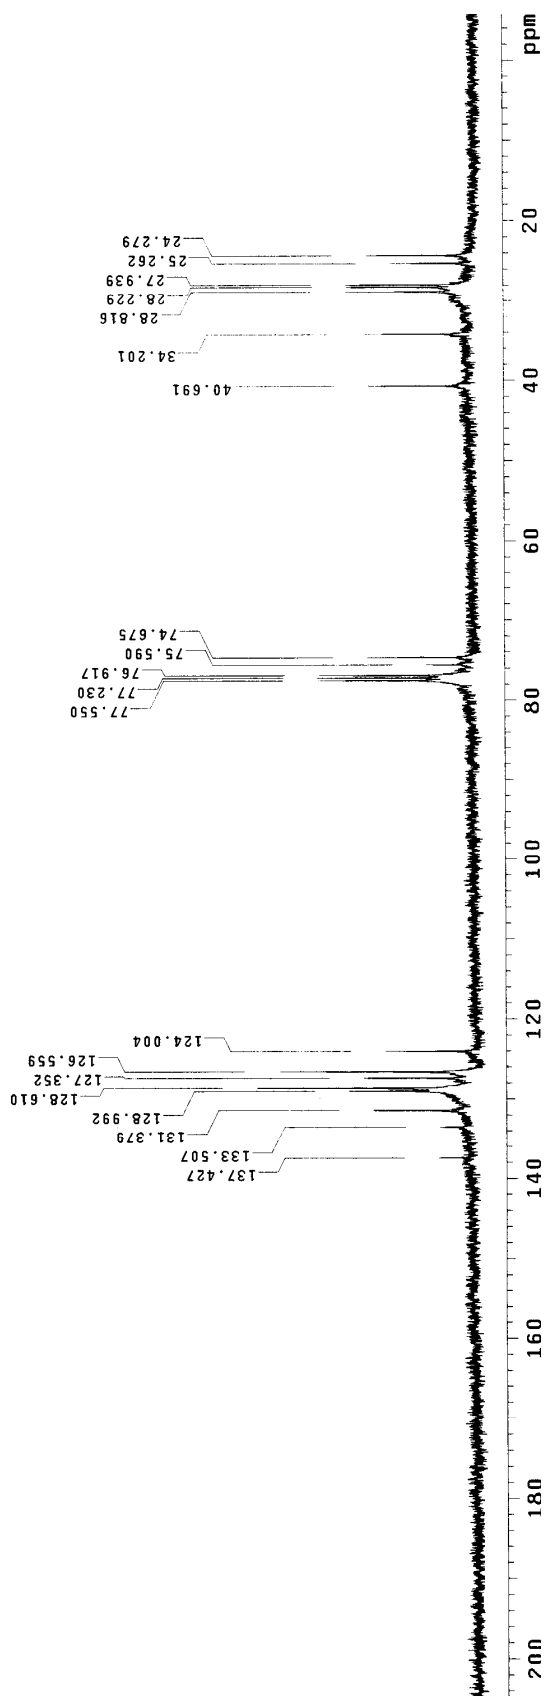

<sup>1</sup>H NMR spectra of 3i

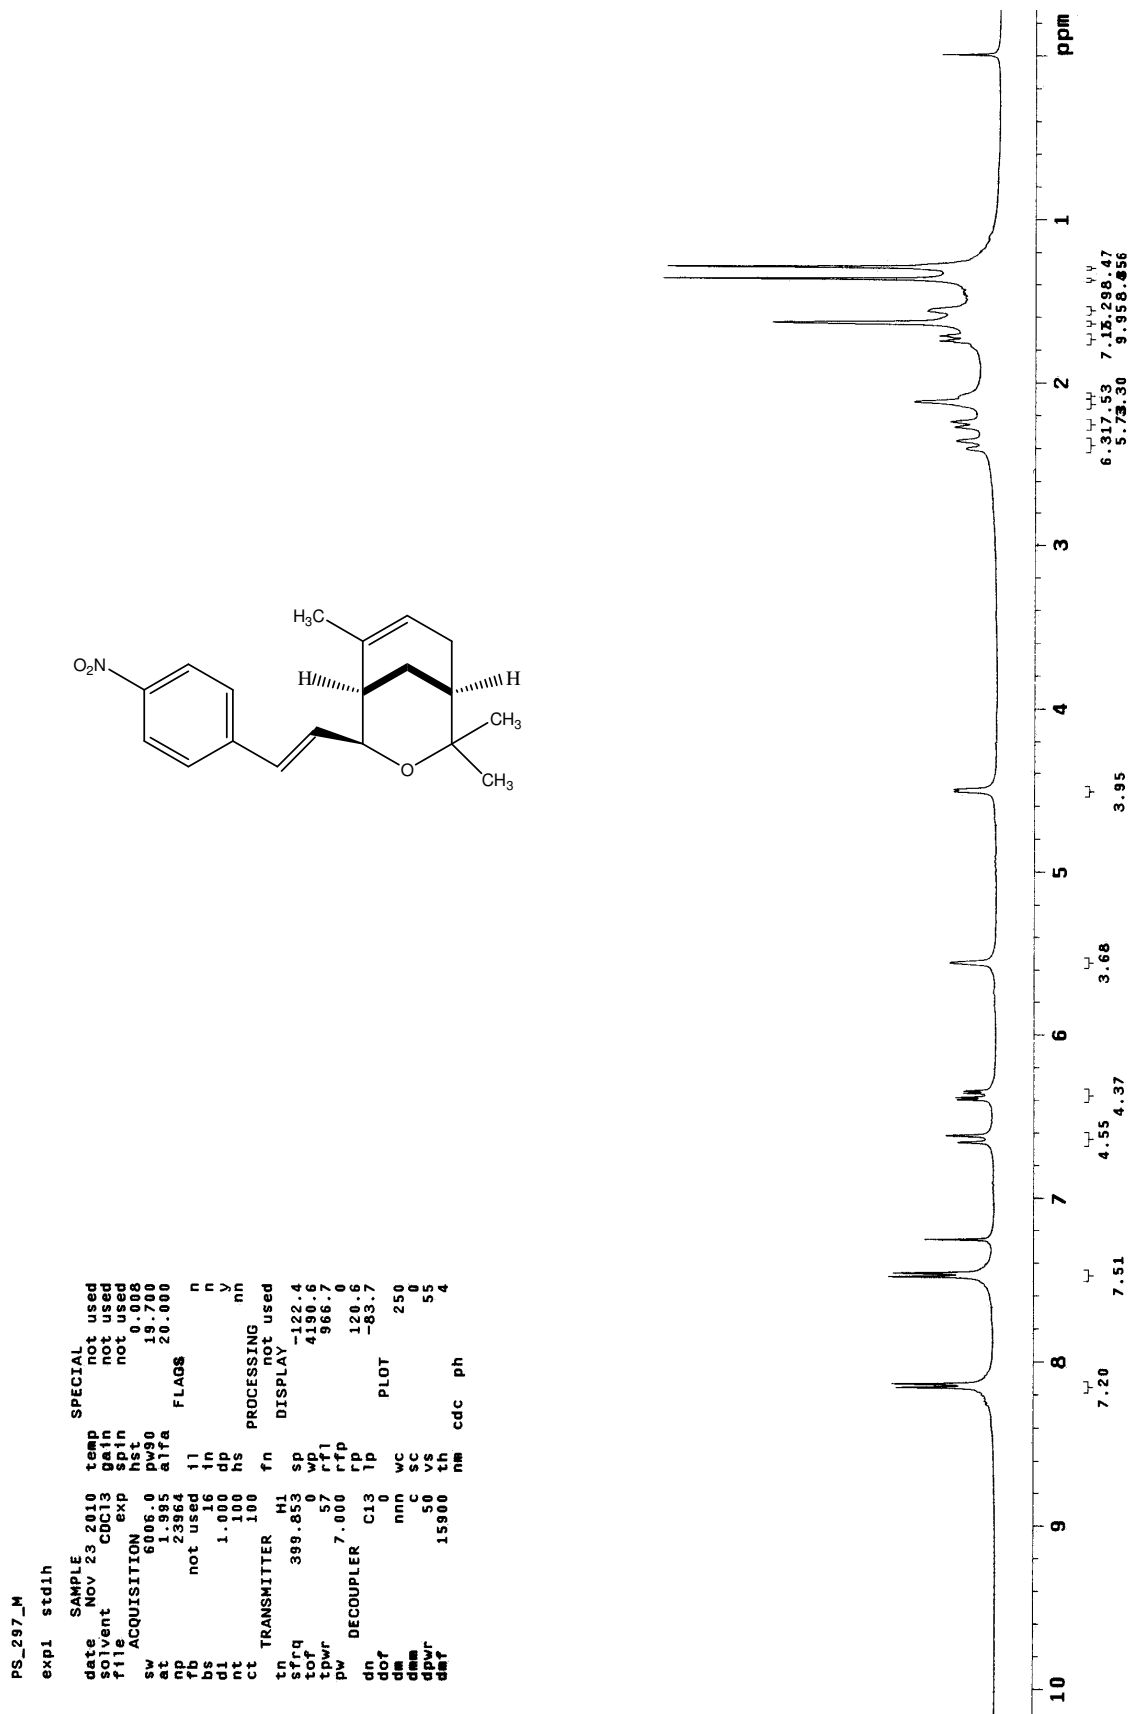



<sup>1</sup>H NMR spectra of 3j

```

PS_172_L
exp3 s2pu1
SAMPLE
date Oct 27 2009 temp not used
solvent cdc13 gain not used
file /export/home/~ not used
asa/ia/PS_172_L.f~ hst 0.008
pw90 19.700
alifa 20.000
ACQUISITION
sw 6369.8
at 1.998 il n
rp 25528 in n
rb not used dp y
bs 1.000 hs
d1 1.000 lb 0.10
nt 32 fn 65536
ct TRANSMITTER H1 sp DISPLAY
tn 399.853 wp -67.7
sfrq 4094.8
tof 362.8 rf1 793.3
tpwr 57 rfp 117.3
pw 9.850 rp -83.0
DECOUPLER C13 PLOT
dn 250
dof 0 wc
dm mnc 67
dmc 50 th 69
dipwr
dmf 15900 rmc cdc ph
    
```

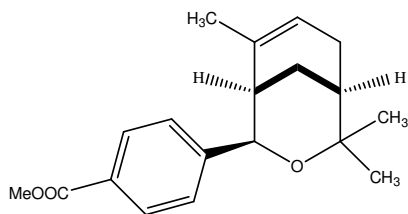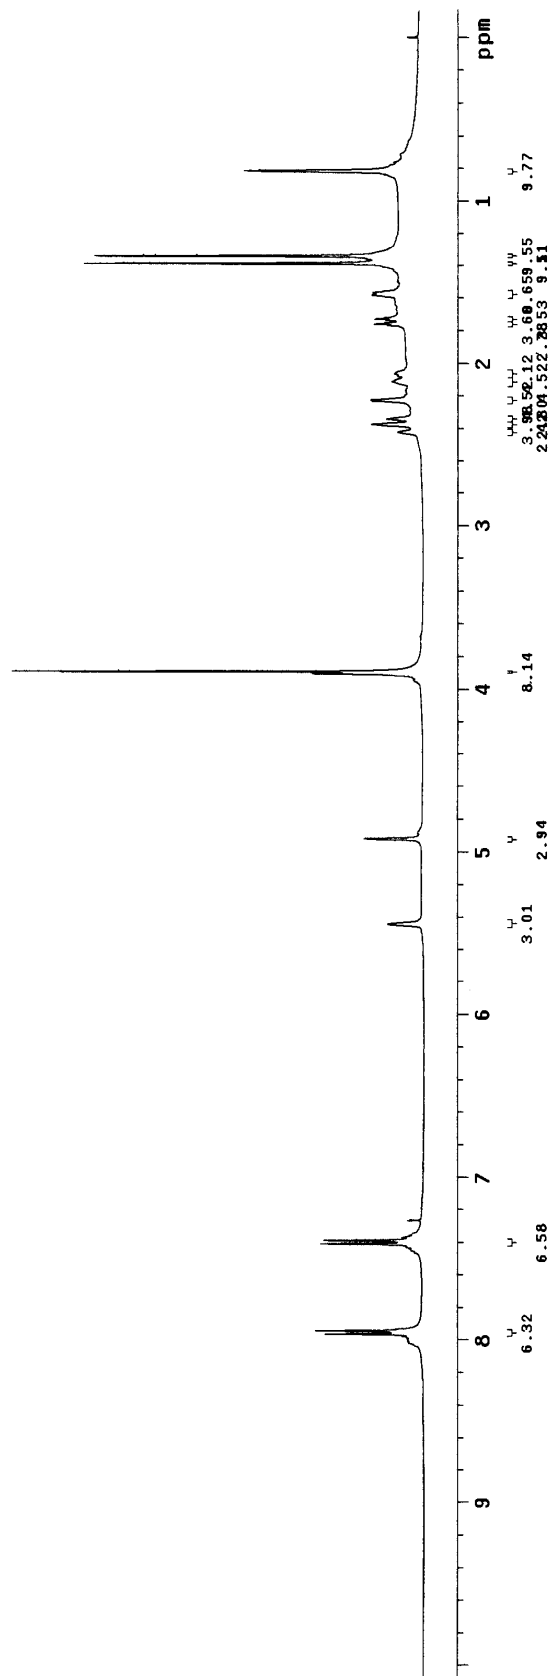

<sup>13</sup>C NMR spectra of 3j

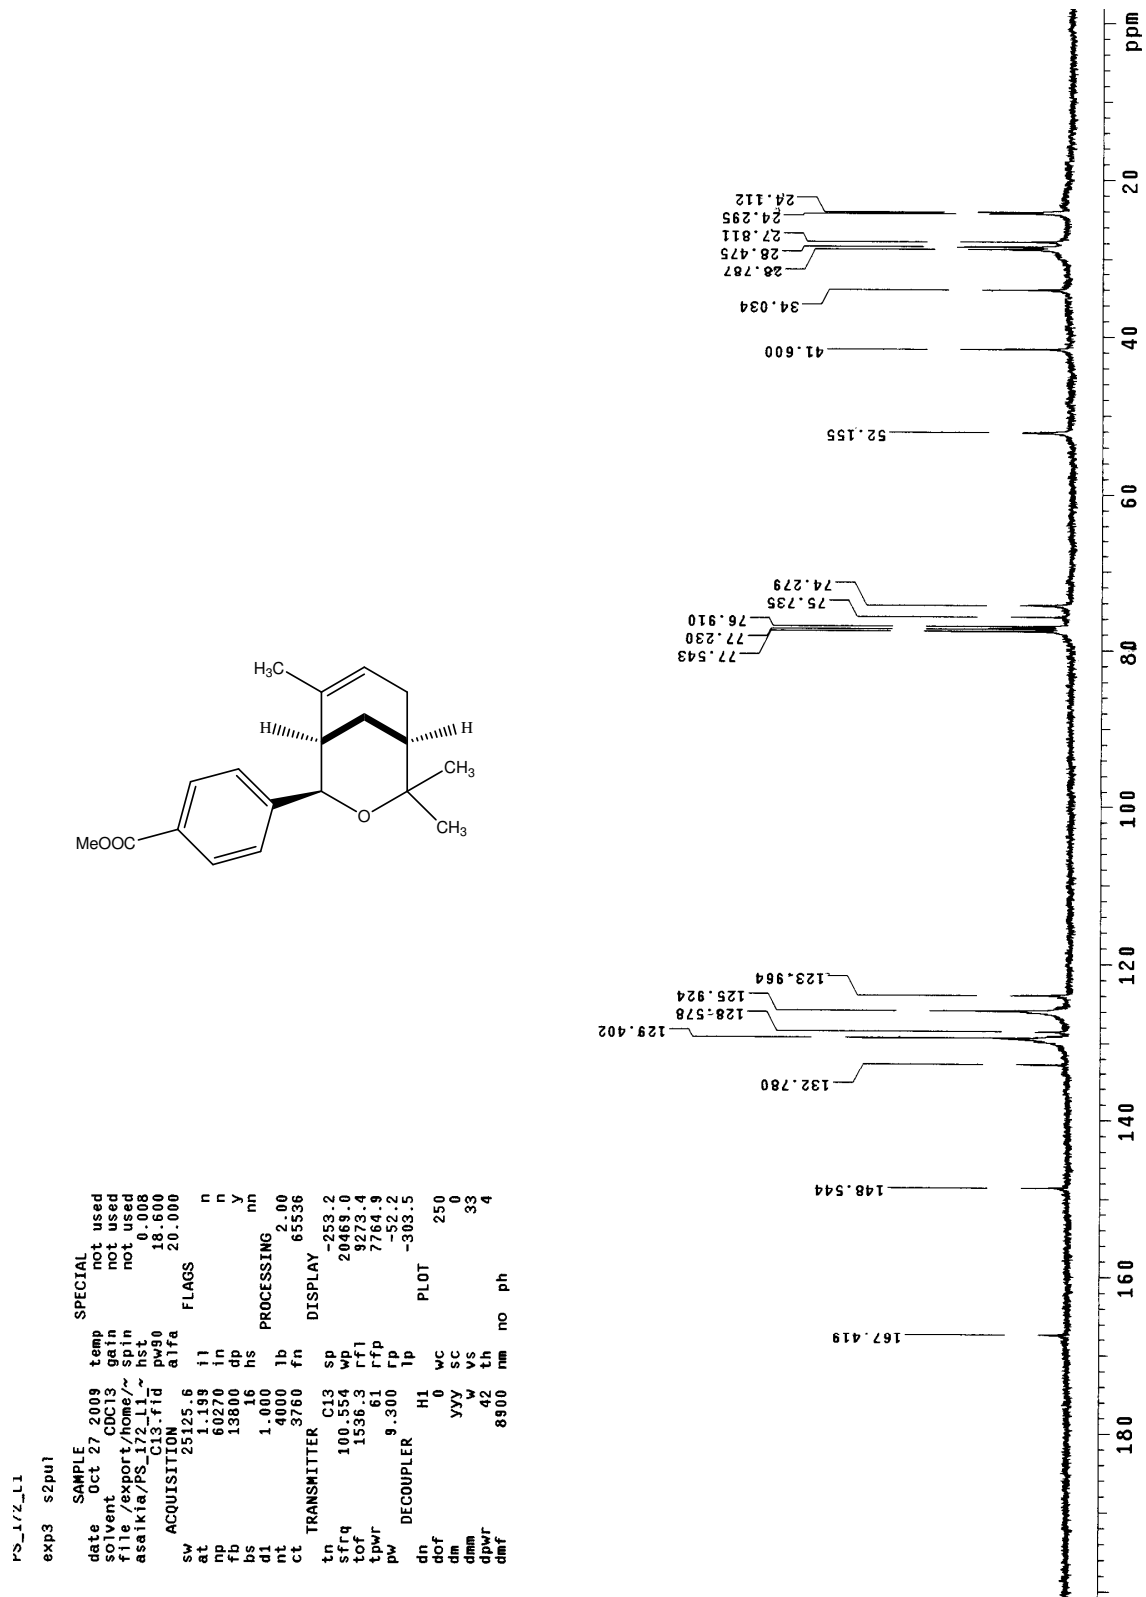

**<sup>1</sup>H NMR spectra of 3k**

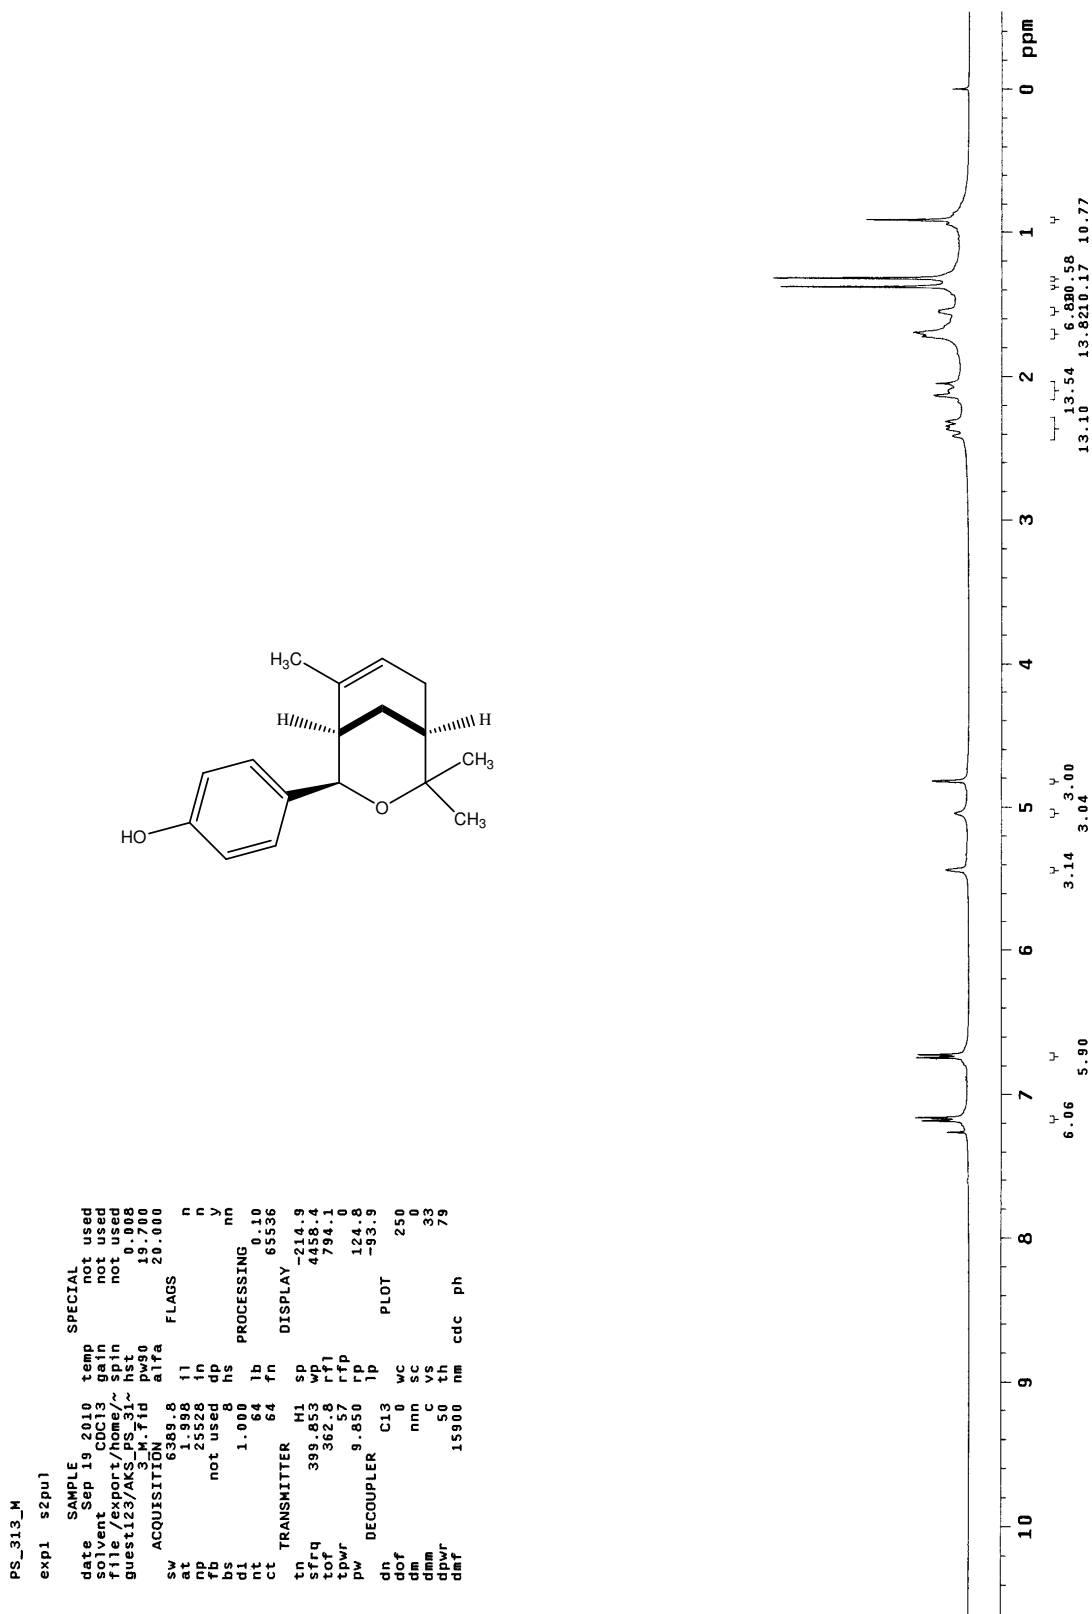





<sup>1</sup>H NMR spectra of 3l

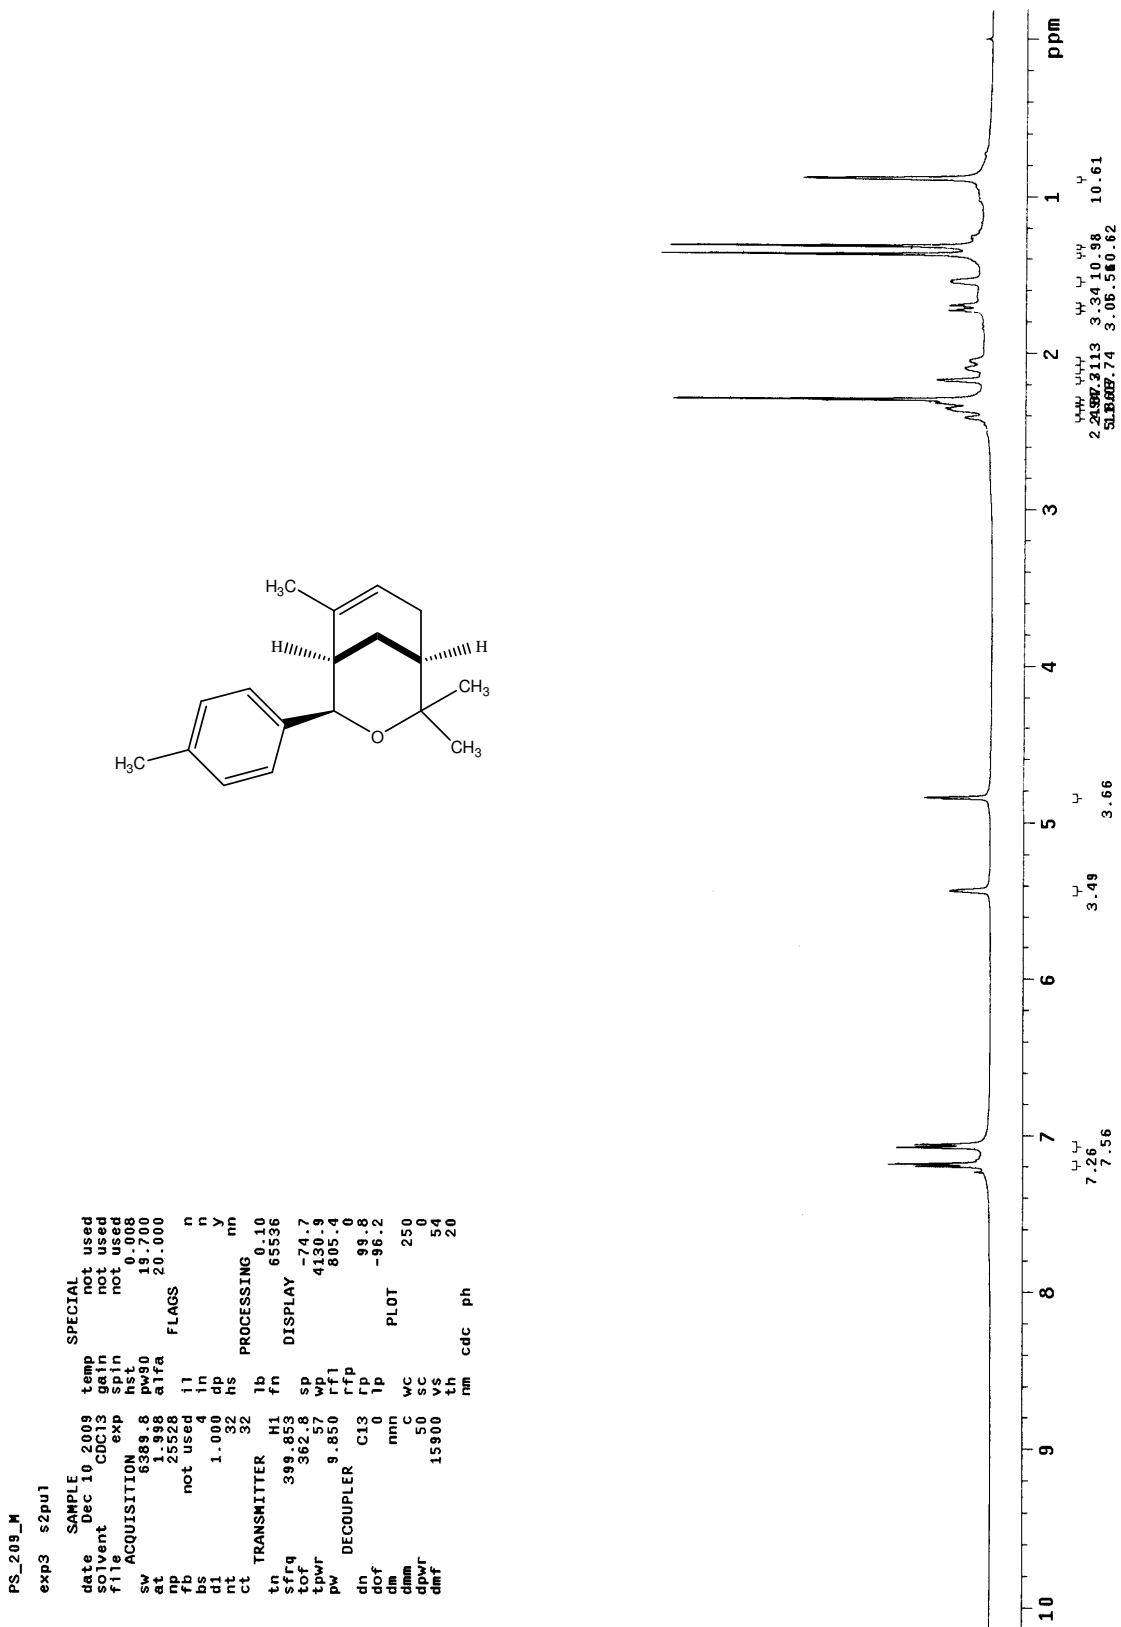

<sup>13</sup>C NMR spectra of 3l

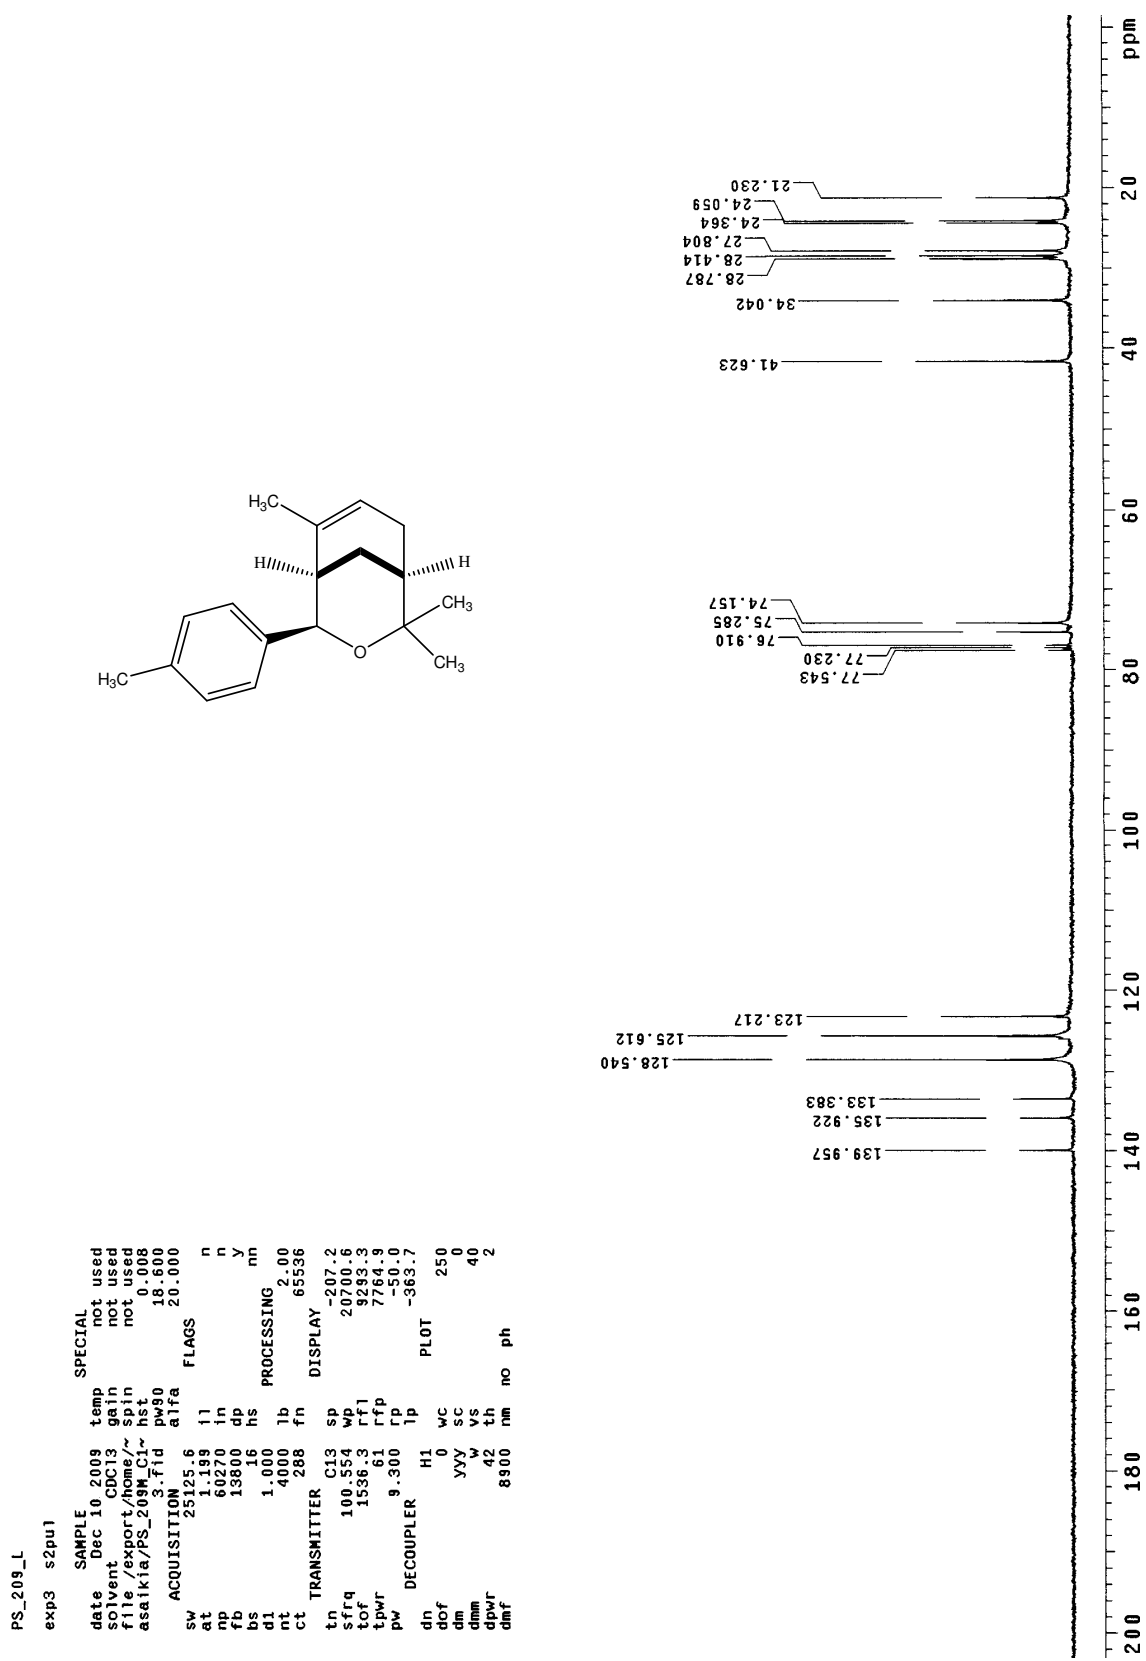

<sup>1</sup>H NMR spectra of 3m

```

PS_293_M
exp1 s2pu1
date Mar 3 2011 temp not used
solvent CDCl3 gain not used
nsf report none sfn not used
c1temp/AKS_H1_710 18.700 pw90
a1fa 20.000
ACQUISITION
sw 6389.8
at 1.998 f1 n
np 25528 in n
fb not used dp y
bs 1.000 hs PROCESSING nn
dl 100 lb 6.10
ct 100 fn 65536
tn TRANSMITTER H1 sp DISPLAY
sfrq 399.853 wpr -188.4
tof 362.8 rfl 4374.6
tpwr 57 rfp 792.9
pw 9.850 rp 106.1
DECOUPLER C13 PLOT
dn 250
df nn0 wc
dm nnc vc
dmm 50 th vs
dpwr 19
dmf 15900 nm cdc ph
    
```

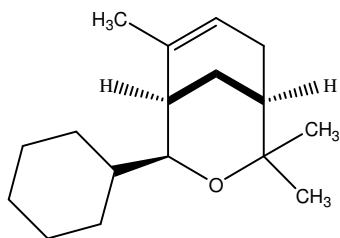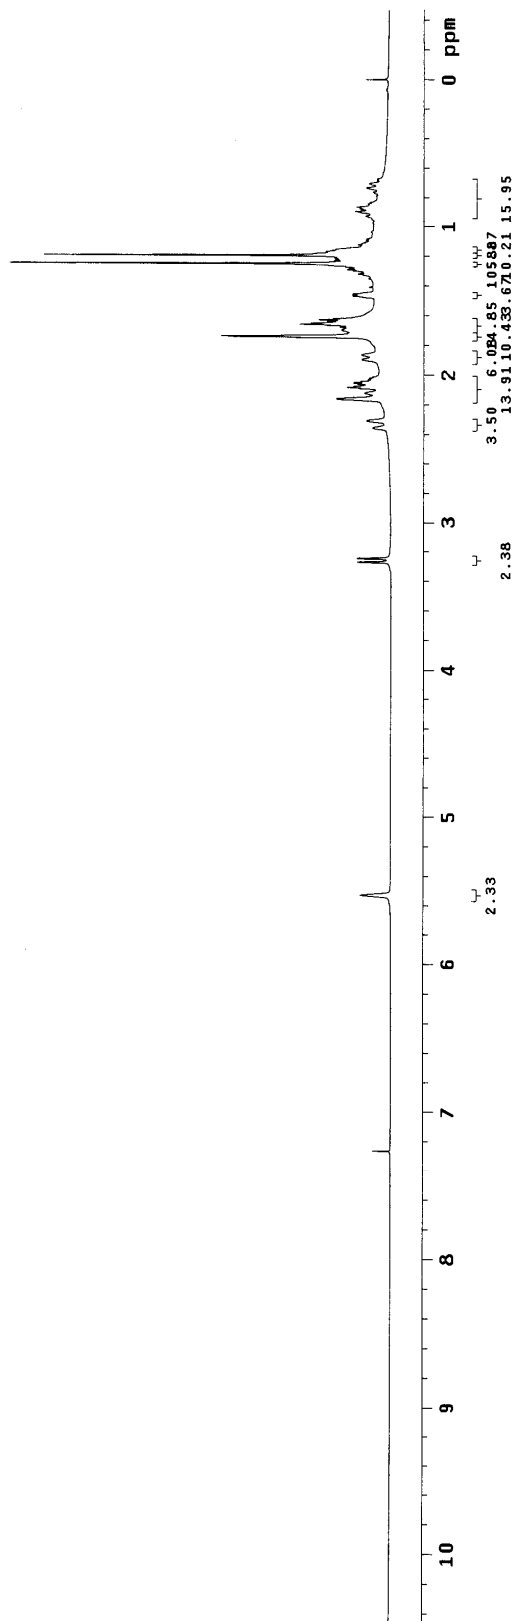

<sup>13</sup>C NMR spectra of 3m

```

PS_293_M
exp1 s2pu1
SAMPLE
date May 9 2010
solvent May CDC13
file exp not used
ACQUISITION
sw 25125.6 exp gain not used
at 1.199 pw90 hst 0.008
np 60270 alfa 18.600
fb 13800 il n
bs 16 in n
d1 1.000 dp y
nt 4000 hs nn
ct TRANSMITTER 928 PROCESSING 2.00
tn lb fn 65536
sfrq C13
tof 100.554
lpwr 1536.3 sp -220.3
pw 9.300 rfi 20766.5
dn DECOUPLER H1 rfp 9273.4
dof 0 rpp 7764.9
dm yy yyp -22.1
dmw 42 tp -413.8
dpu w wc 250
dmf 8900 w sc 0
vs y s 23
nm no ph 5
    
```

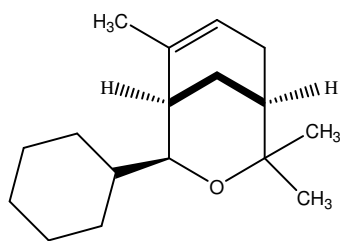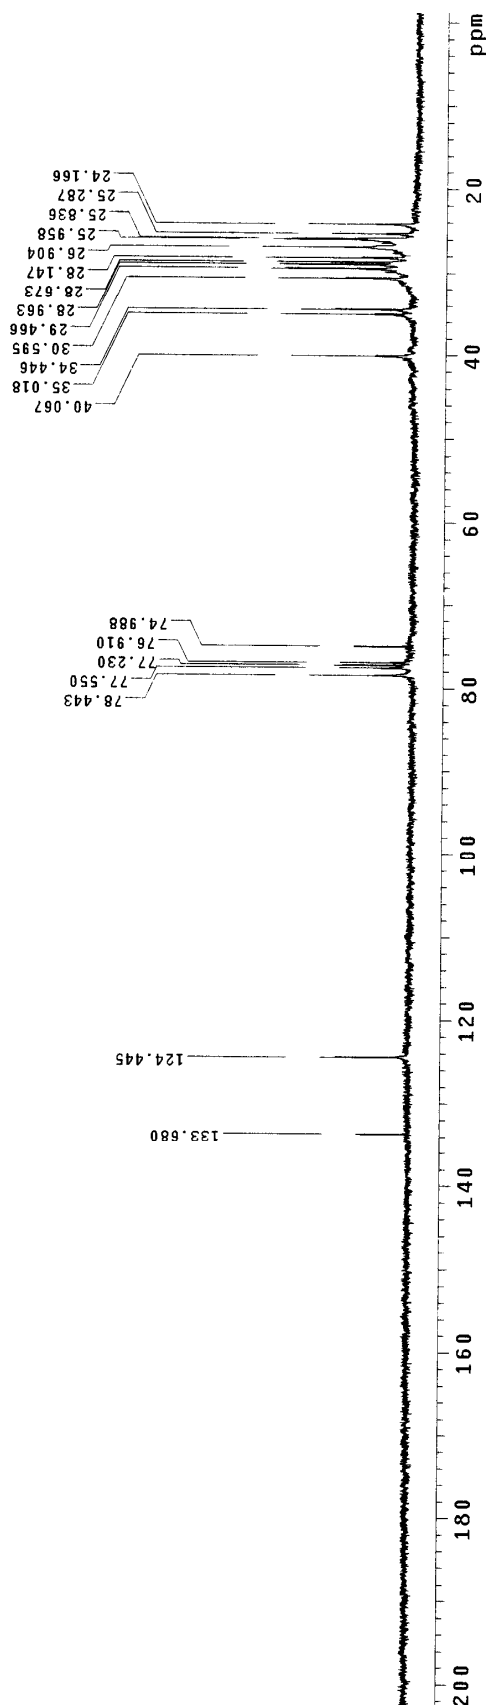

<sup>1</sup>H NMR spectra of 3n

```

PS_196_M
exp2 s2pu1
SAMPLE
date Nov 26 2009
file CDC13
solvent not used
SPECIAL gain not used
spin not used
hst 0.008
sw 6389.8
at 1.998
pw90 19.700
25528
alpa 20.000
n
l1 n
in n
d1 1.004
d2 0.48
d3 y
d4 n
ct 32
hs nm
PROCESSING 0.10
lb 65536
fn 65536
tn H1
sfrq 399.853
tof 362.8
sp -95.6
tpwr 57
pw 4198.0
rfl 792.5
DECOUPLER rfp
rfp 93.9
rfp -4.0
lp
nm
WC 250
SC 50
VS 81
th 20
nm cdc ph
    
```

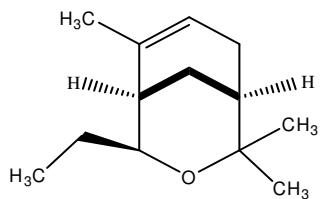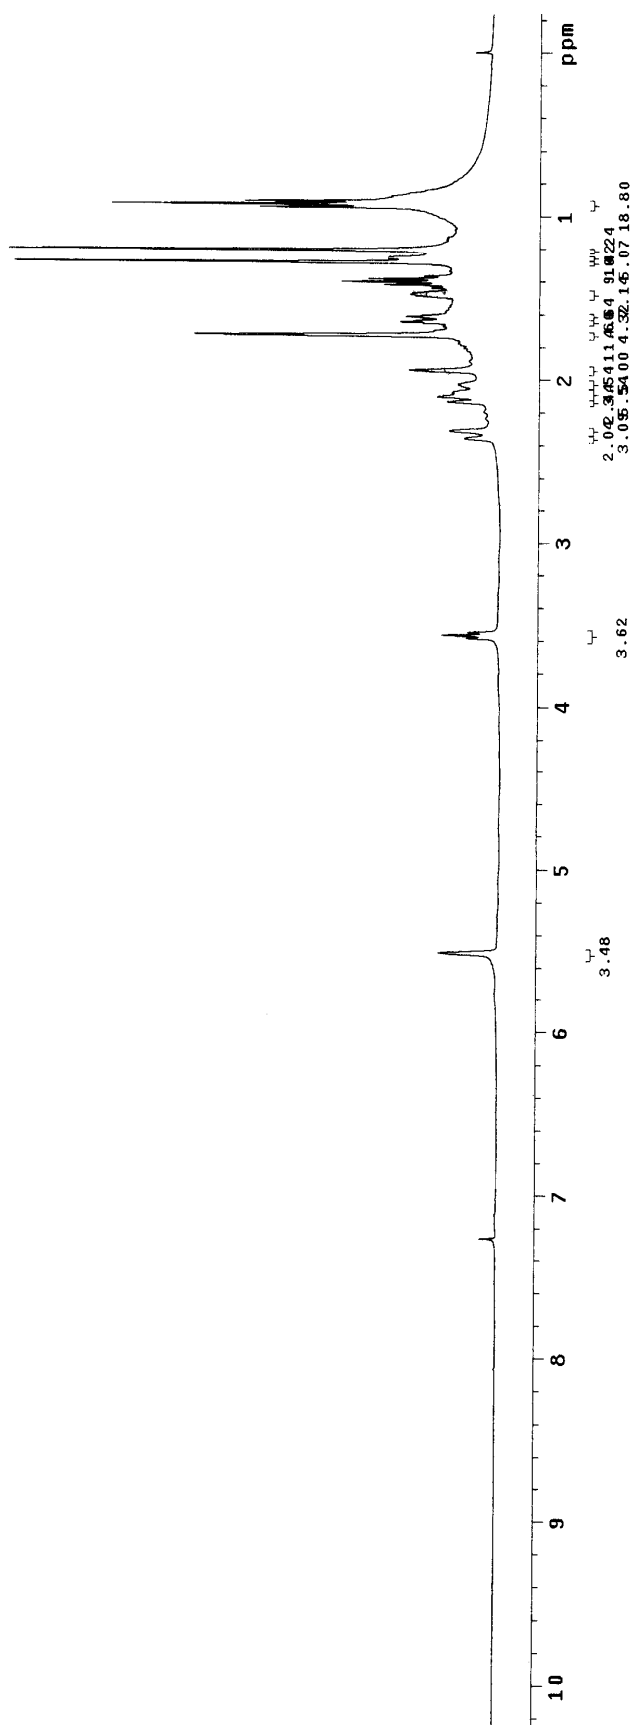

<sup>13</sup>C NMR spectra of 3n

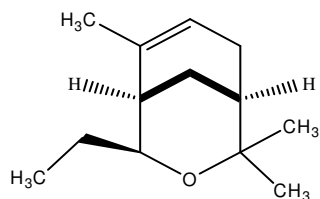

```

PS_196_M
exp2 s2pu1
SAMPLE
date Nov 26 2009
solvent CDC13
f1 fe
sw ACQUISITION exp
at 25125.6
cp 60270
bs 13600
d1 1
nt 15000
ct 15000
SPECIAL
temp not used
gain not used
hsc not used
hst 18.600
pwr0 20.000
alpha
FLAGS
n
n
Y
nn
PROCESSING 2.00
lb 65536
tn C13
sfcq 100.554
tof 1536.3
tpwr 61
pw 9.300
DECOUPLER H1
dn dof 0
dm yvy
dmm w
dpwr 42
dmf 8900
nm no ph
    
```

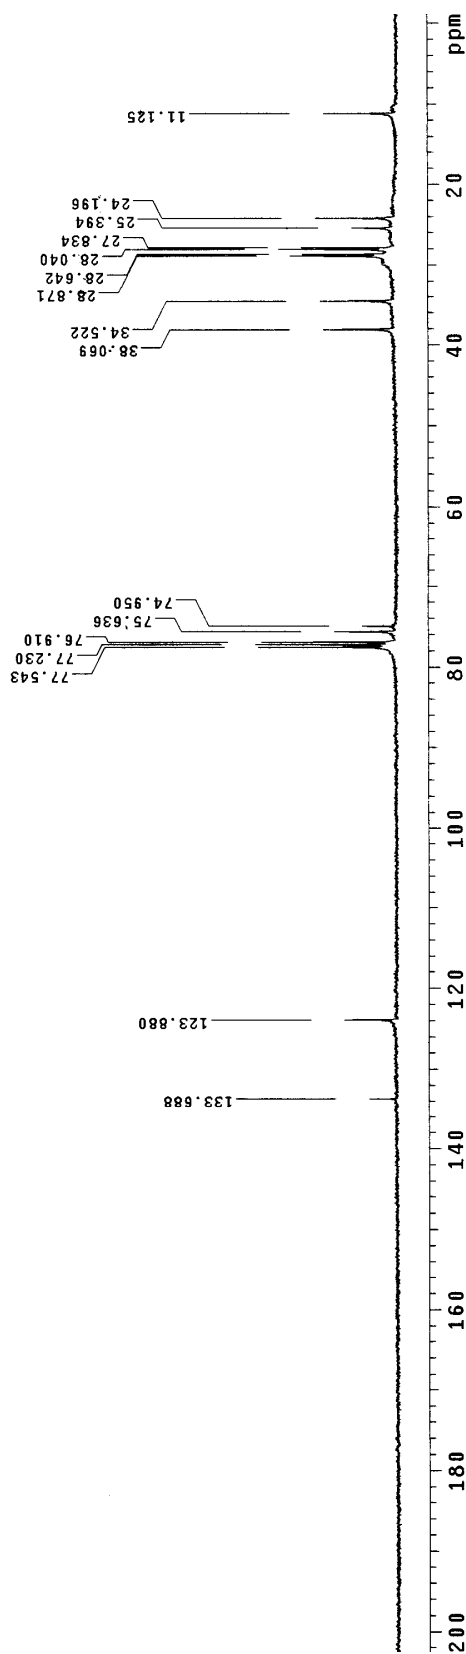

<sup>1</sup>H NMR spectra of 3o

```

PS_212_M
exp1 s2pu1
SAMPLE
date Dec 14 2008
solvent CDCl3
file
sw ACQUISITION exp
at 6389.8 pw90
np 25528 a1fa
fb not used il
bs 4 in
di 1.000 dp
rt 32 hs
ct TRANSMITTER H1
tn 0.10
sfrq 399.853 fn
tof 362.8 sp
tpwr 57 wp
pw 9.850 rfp
DECOUPLER C13 rp
dn 102.6 lp
dof -61.5
dm mnn wc
dmm 50
dpr 86
dmf 15900 th
nm cdc ph
SPECIAL
temp not used
gain not used
spin not used
hst 0.008
pw90 19.700
a1fa 20.000
FLAGS
n
n
y
nm
hs
lb 65536
fn
DISPLAY
-103.2
4156.0
791.7
0
102.6
-61.5
250
50
86
20
    
```

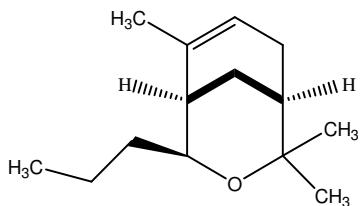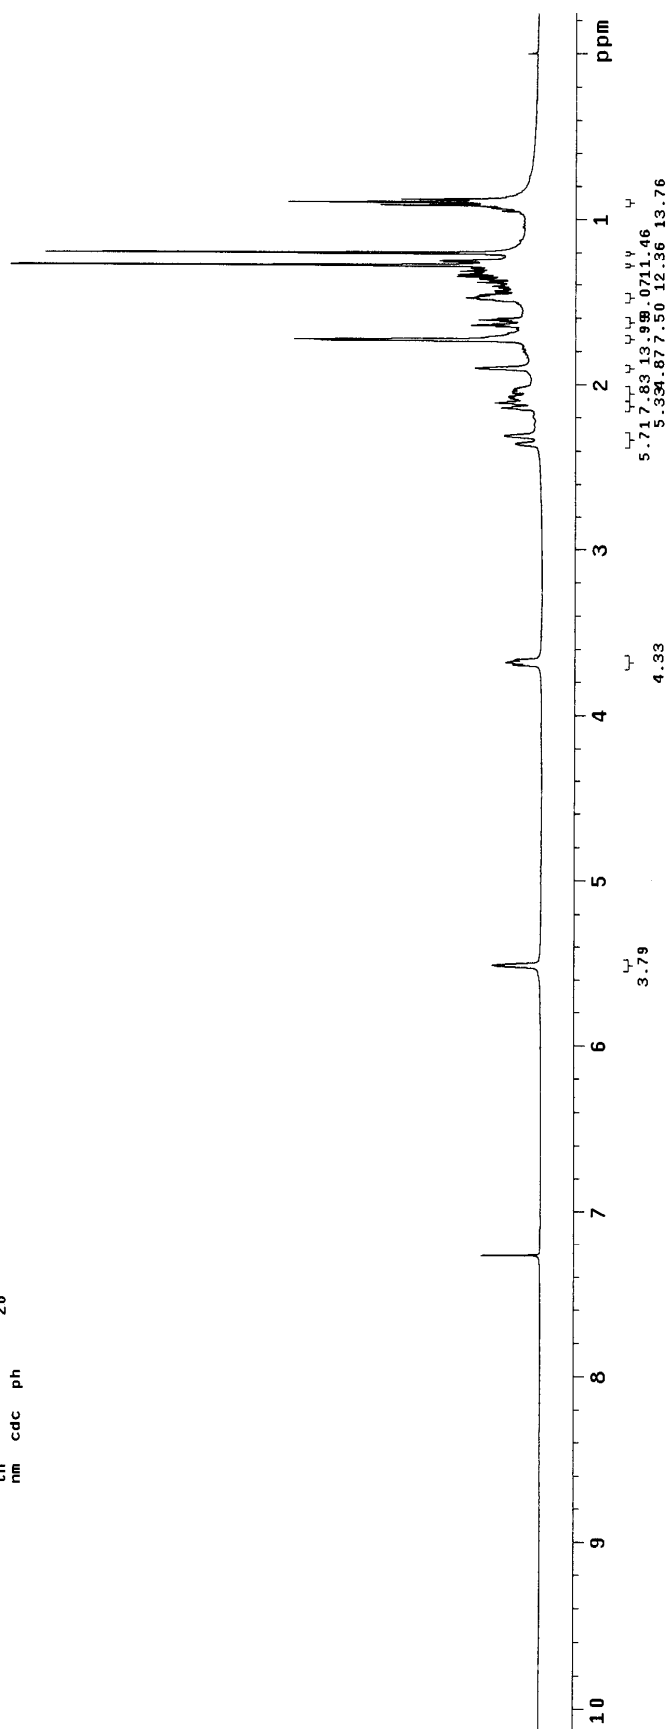

<sup>13</sup>C NMR spectra of 3o

```

PS_212_M
exp1 s2pul.
date Dec 14 2009
solvent CDC13
file CDC13
ACQUISITION exp
sw 25125.6
at 1.199
np 60270
fb 13800
d1 1.000
nt 12000
ct 3312
SPECIAL
temp not used
gain not used
spin not used
hst 0.008
pw90 18.600
alpha 20.000
FLAGS
n
n
y
nn
nn
PROCESSING
lb 2.00
fn 65536
DISPLAY
sp -383.6
wp 20888.4
rf1 9271.1
rfp 7764.9
rp -35.7
lp -354.5
PLOT
wc 250
sc 0
vs 24
th 5
nm no ph
    
```

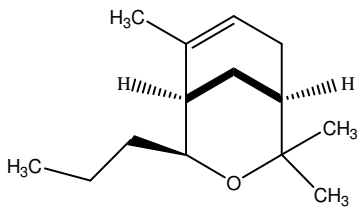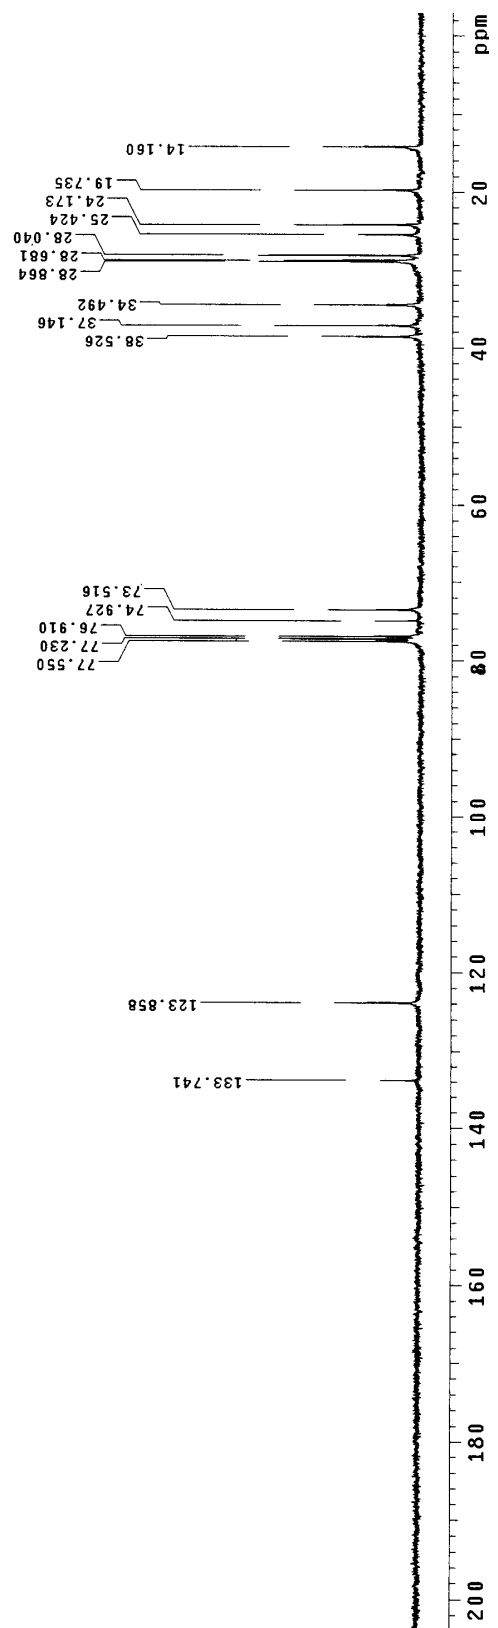



### <sup>1</sup>H NMR spectra of 3p

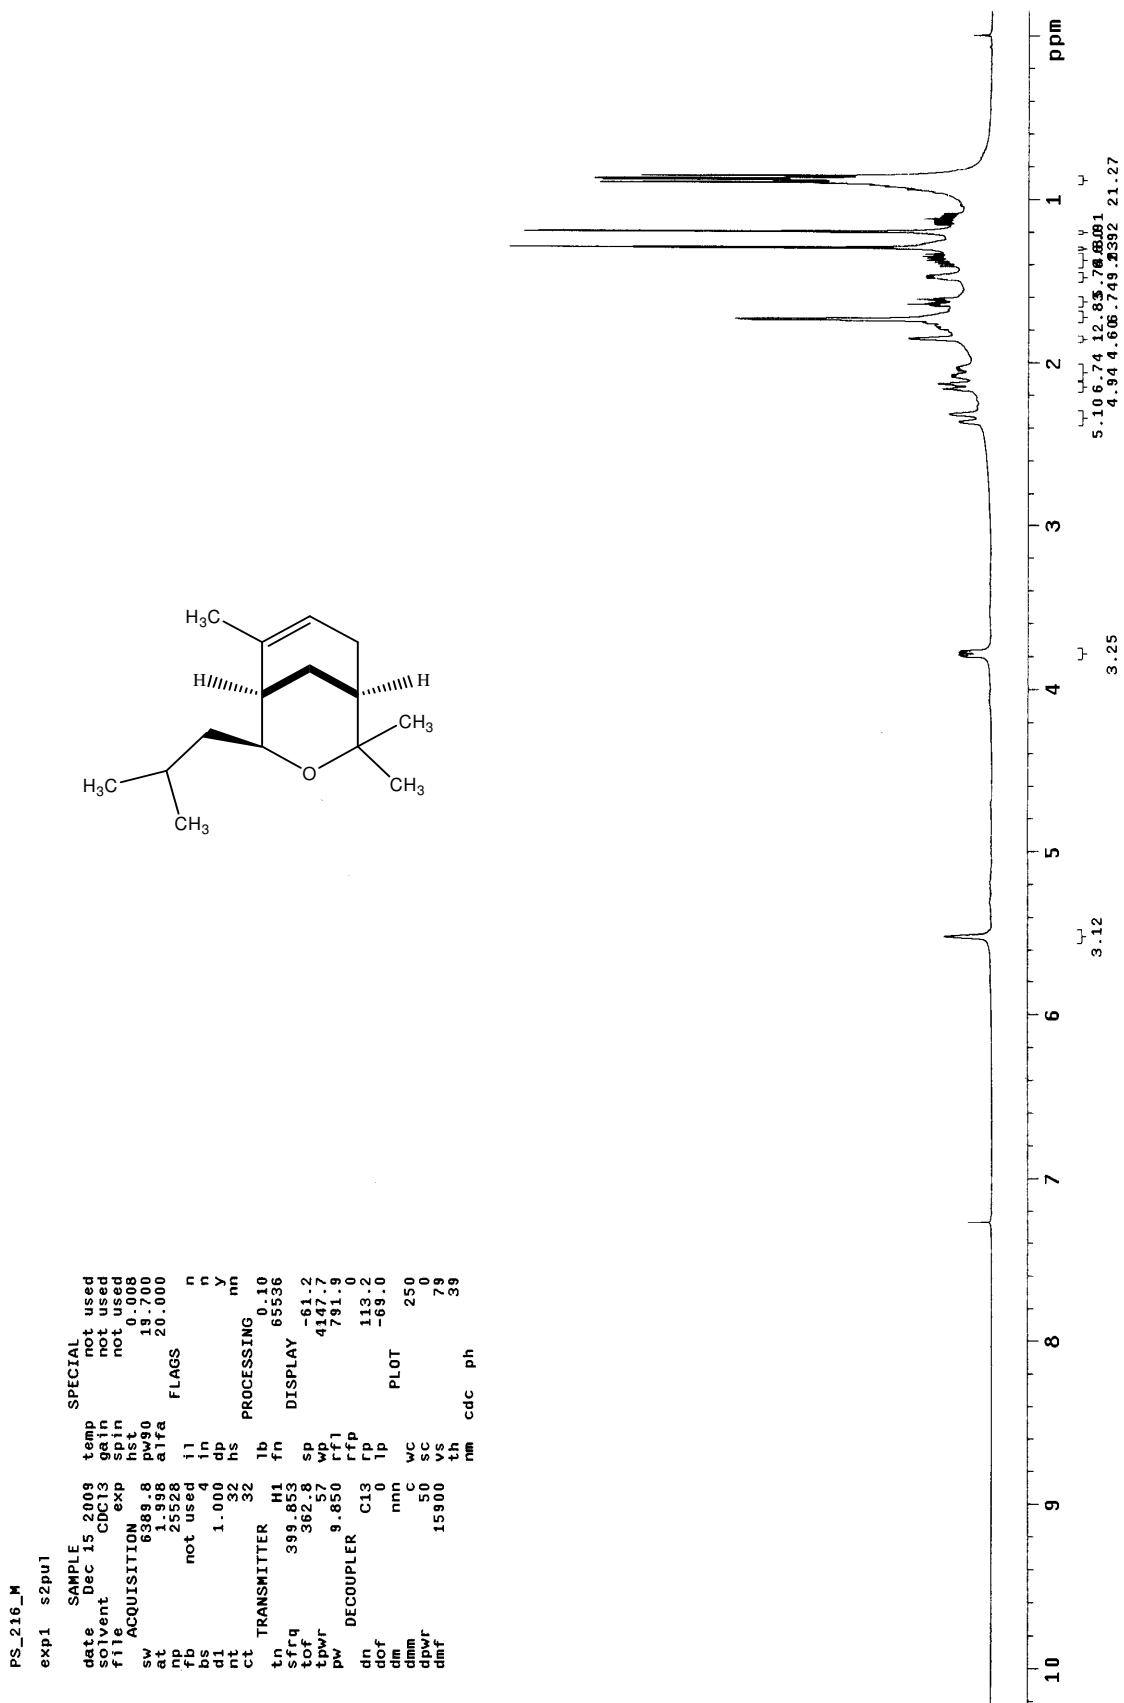

<sup>13</sup>C NMR spectra of 3p

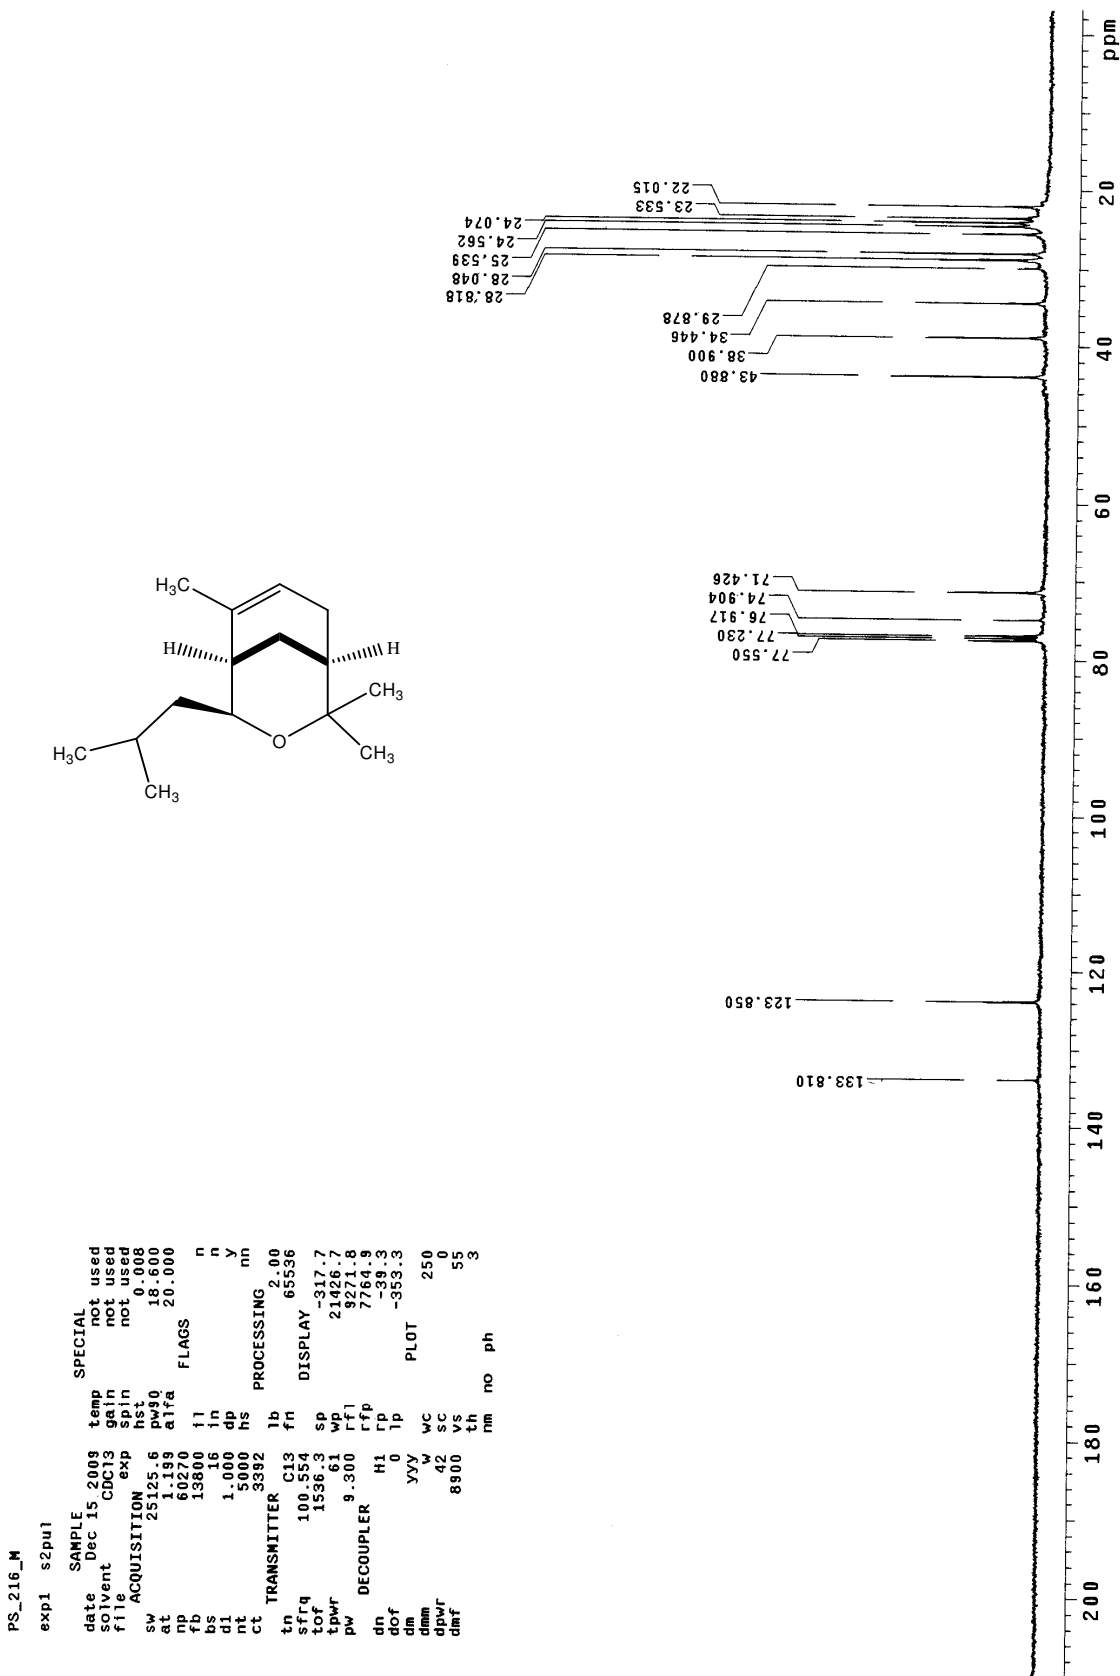

<sup>1</sup>H NMR spectra of 3q

```

PS_302_M
exp1 s2pu1
SAMPLE
date Mar 3 2011 temp not used
solvent Mar CDCl3 gain not used
file /export/home/~ spin not used
c1temp/AKS_M_21d 19.700
ns90 20.000
atfa 20.000
ACQUISITION
sw 6389.8 n
at 1.998 f1 n
np 25528 in n
fb not used dp y
bs 8 hs
di 1.000 lb PROCESSING nn
ct 100 fh 65536
TRANSMITTER H1 SP DISPLAY
tn 230.5
sfrq 399.853 wdr 4391.4
tof 362.8 rfl 792.9
tpwr 57
pw 9.850 rp 92.6
DECOUPLER C13 PLOT
dn 0
dor nn 250
dpc vs 57
dmm 50 th 20
dpr 15900 nm cdc ph
    
```

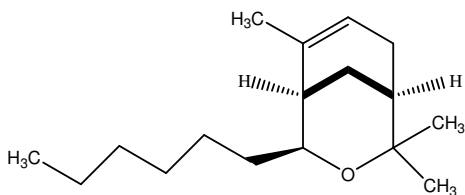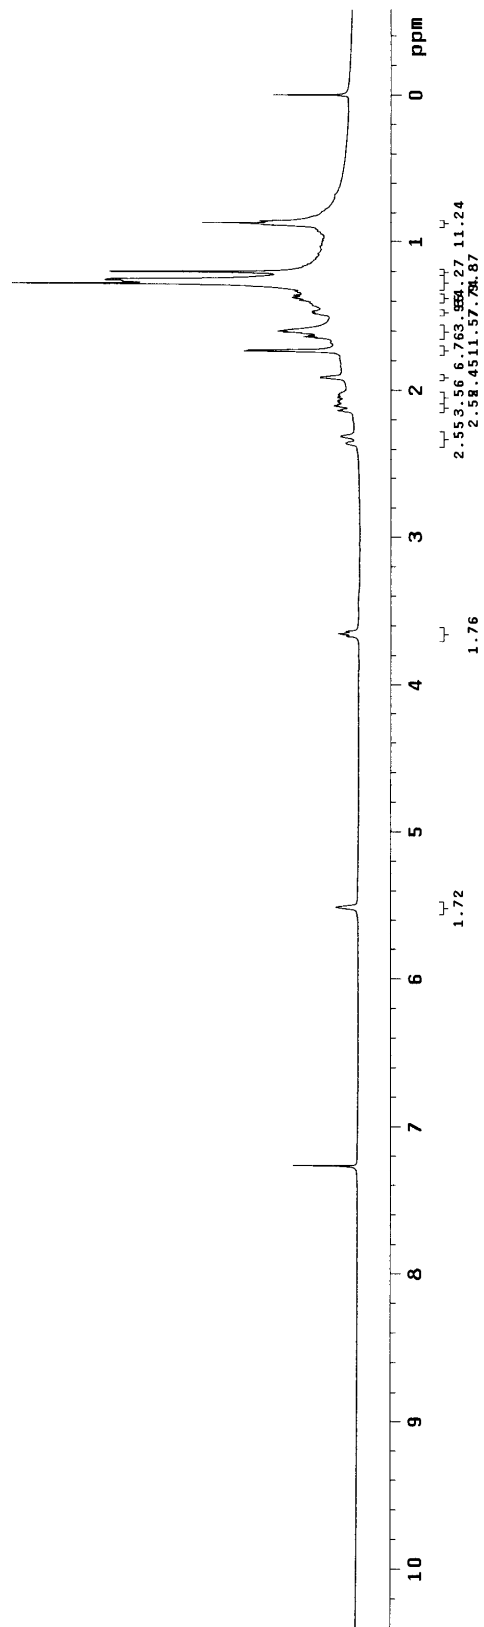

<sup>13</sup>C NMR spectra of 3q

```

PS_302_M
exp1  szpu1
date  SAMPLE
    Jun 1 2010
solvent  CDC13
file  CDC13
sw  ACQUISITION
    at 25125.6
    np 60270
    fb 13800
    bs 16
    d1 1.000
    nt 4000
    ct 4000
    SPECIAL
    temp not used
    gain not used
    spfn not used
    hst 0.008
    pw90 18.600
    alfa 20.000
    FLAGS
    n n
    y y
    nn nn
    PROCESSING
    lb 2.00
    fn 65536
    DISPLAY
    sp -646.1
    wp 21361.4
    rfl 9269.0
    rfp 7764.9
    rp -64.8
    lp -271.4
    DECOUPLER
    H1
    dof 0
    dm yyy
    dmm w
    dpwr 42
    dmr 8900
    nm no ph
    250
    0
    22
    4
    
```

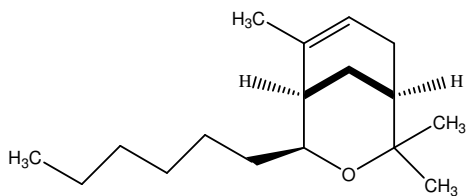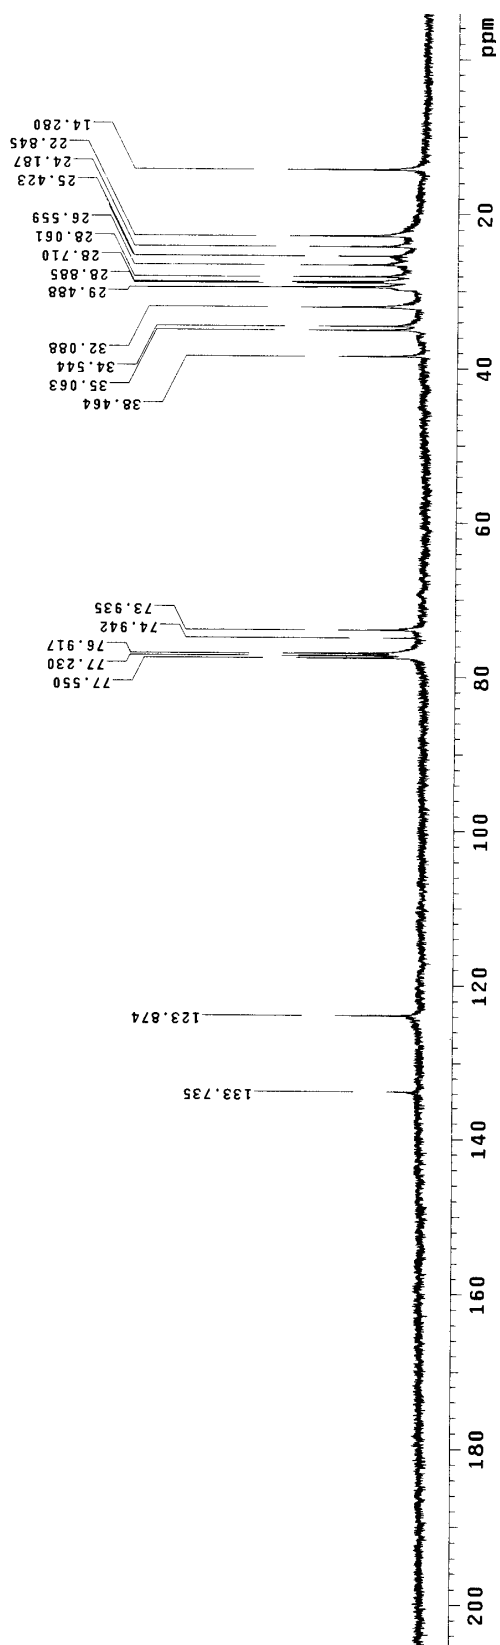

<sup>1</sup>H NMR spectra of 3r

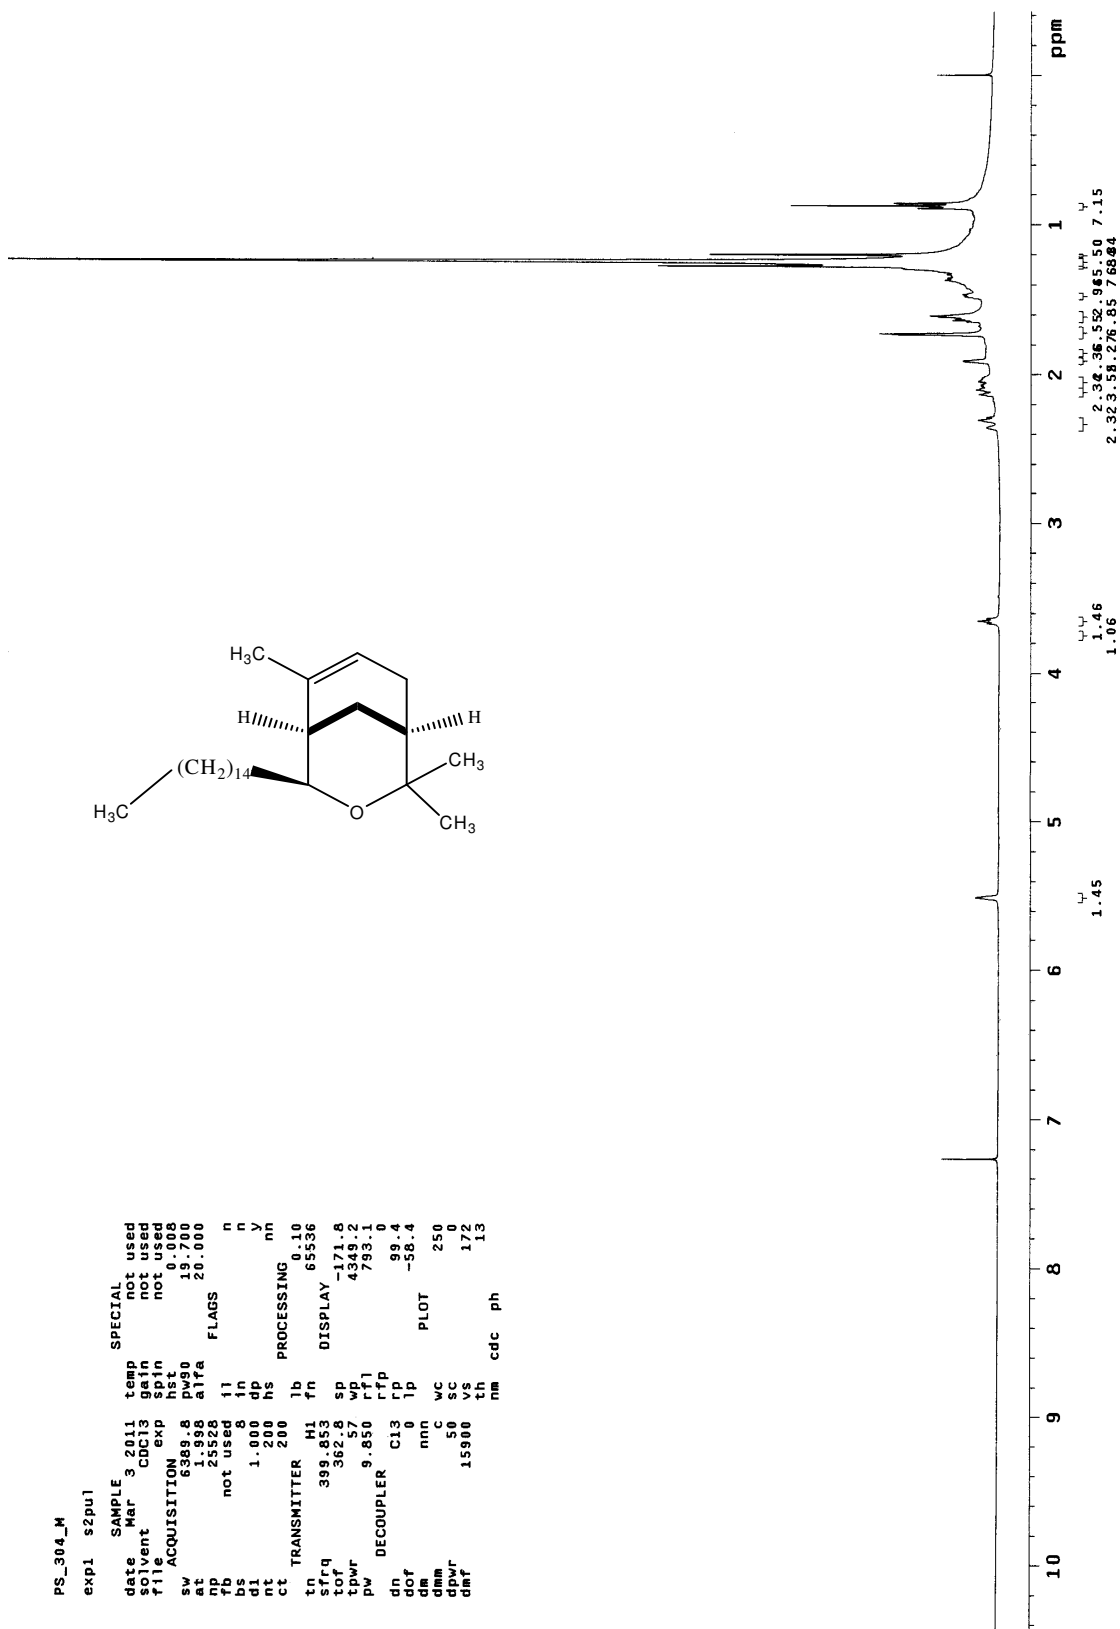

<sup>13</sup>C NMR spectra of 3r

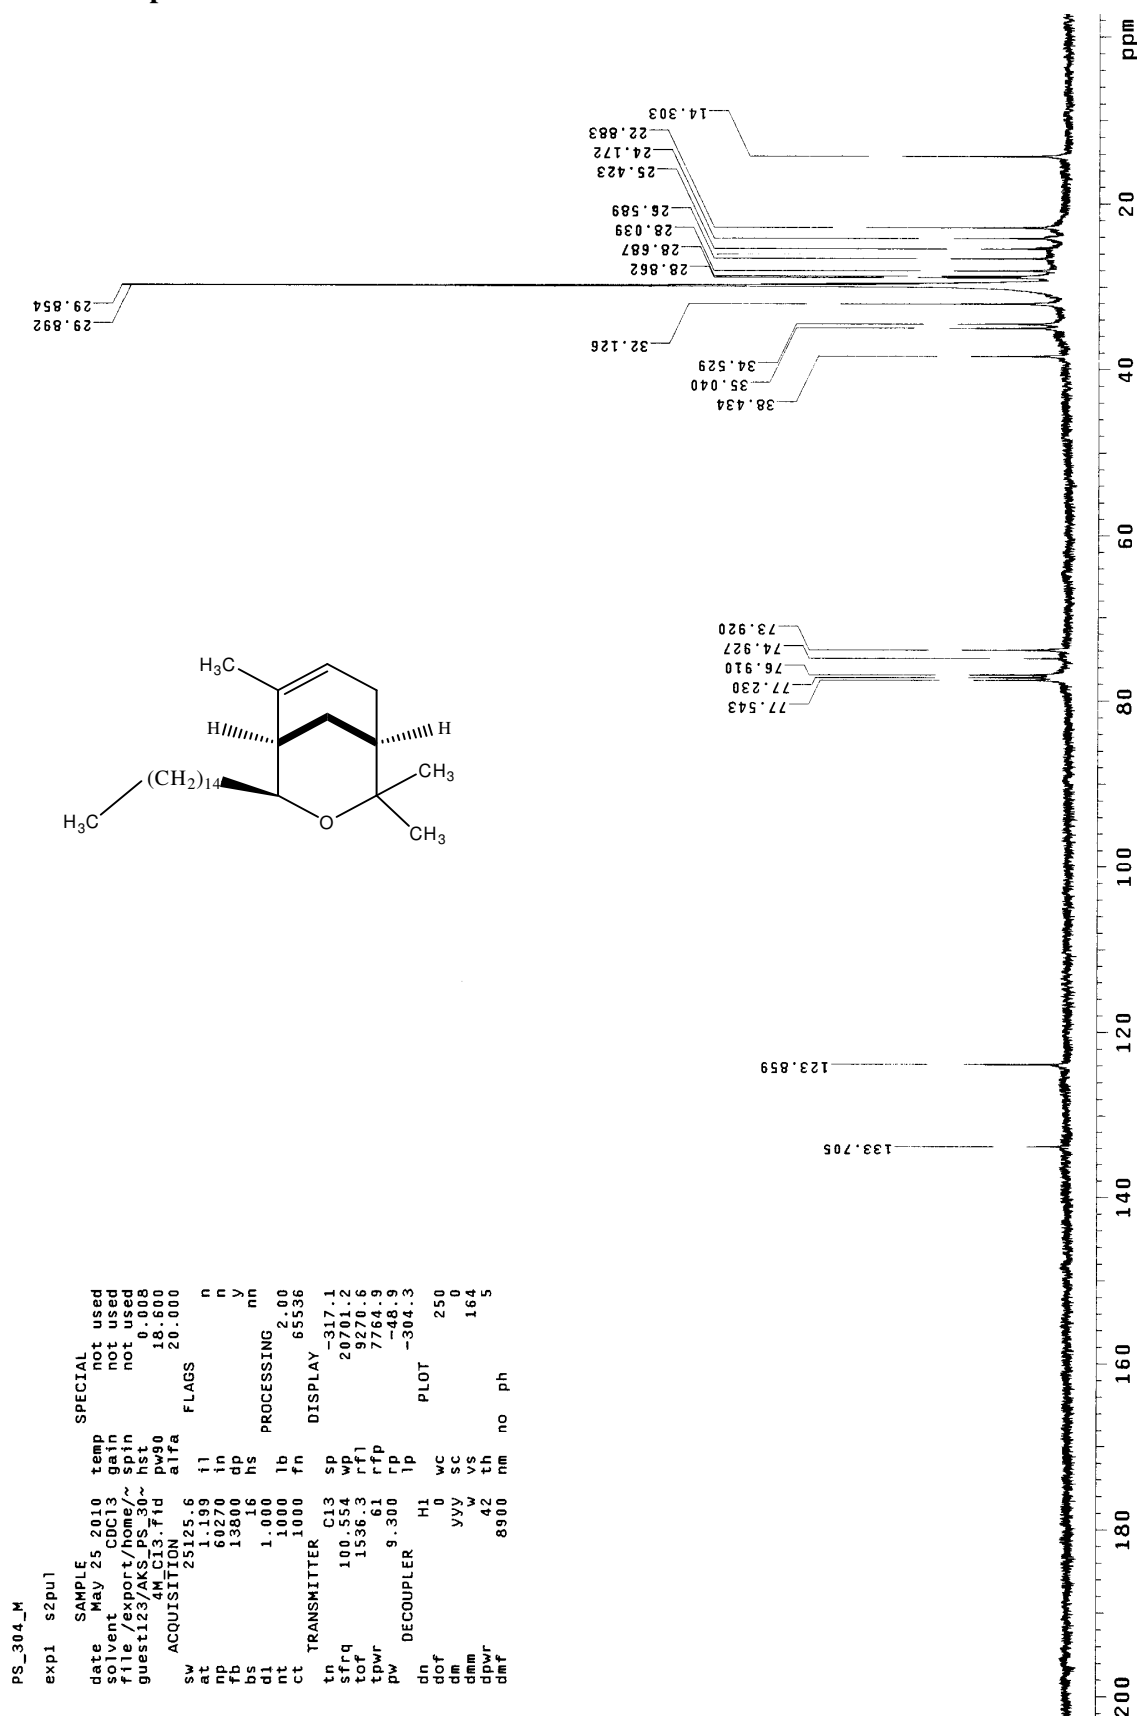

<sup>1</sup>H NMR spectra of 4a & 5a

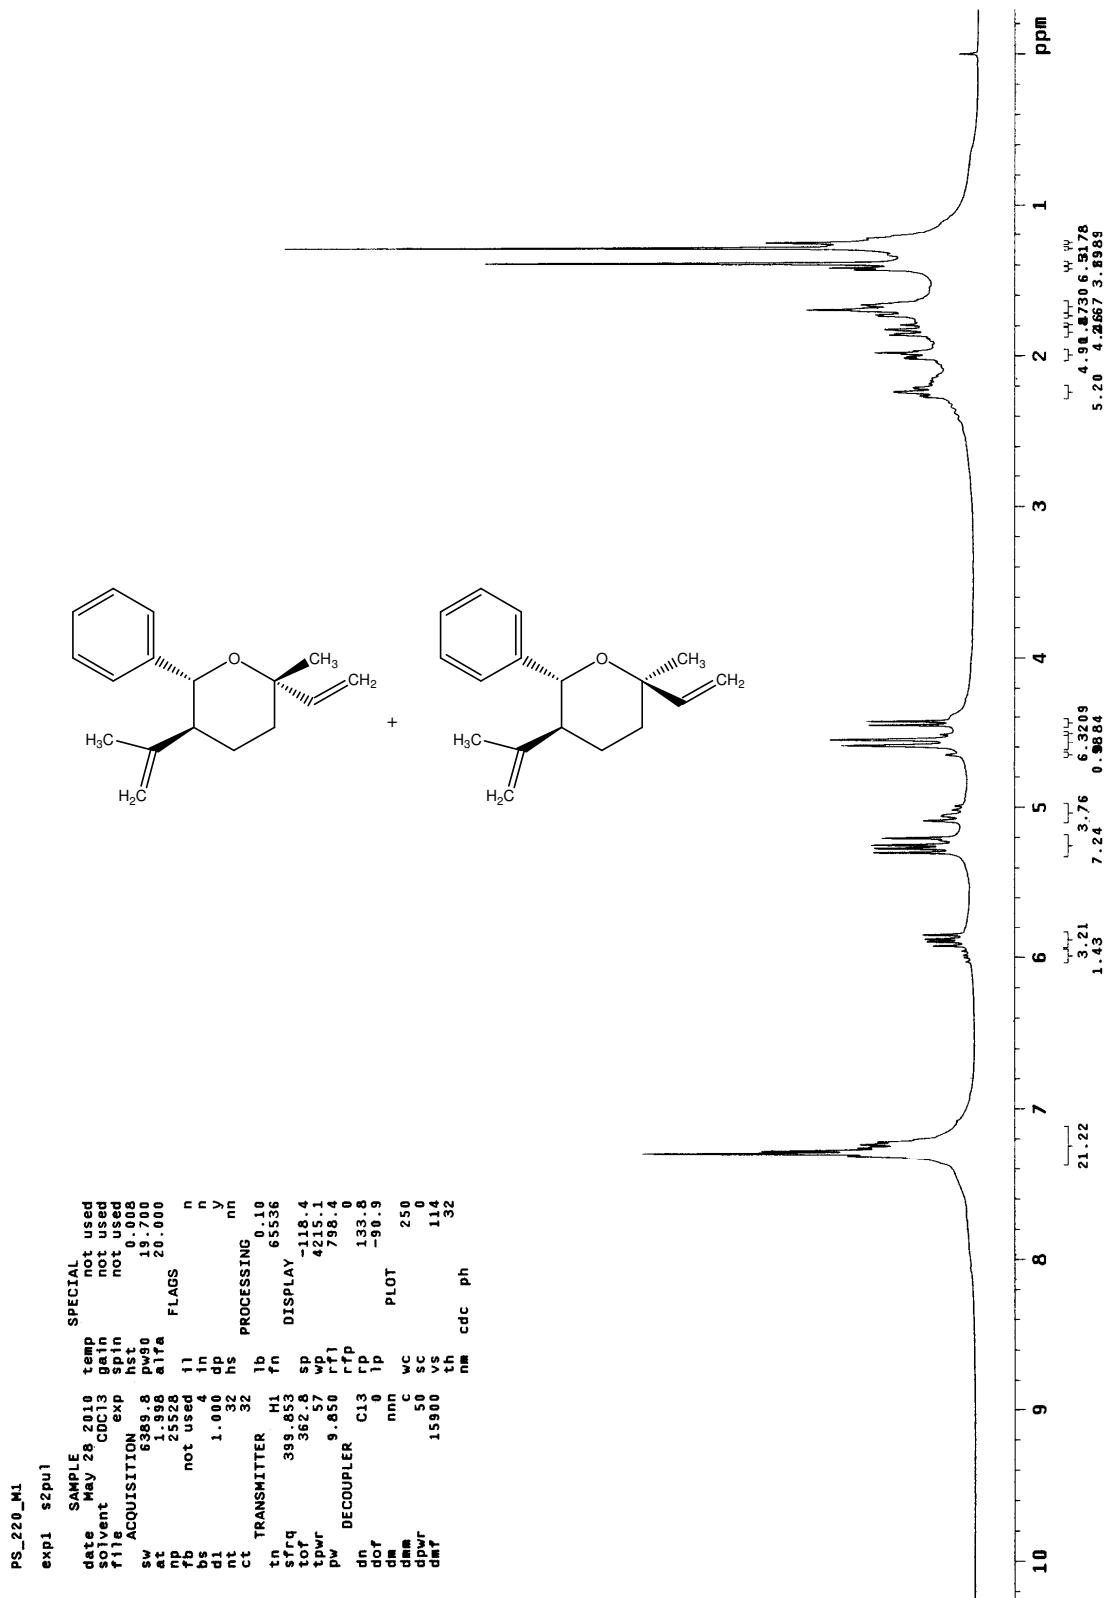

<sup>13</sup>C NMR spectra of 4a

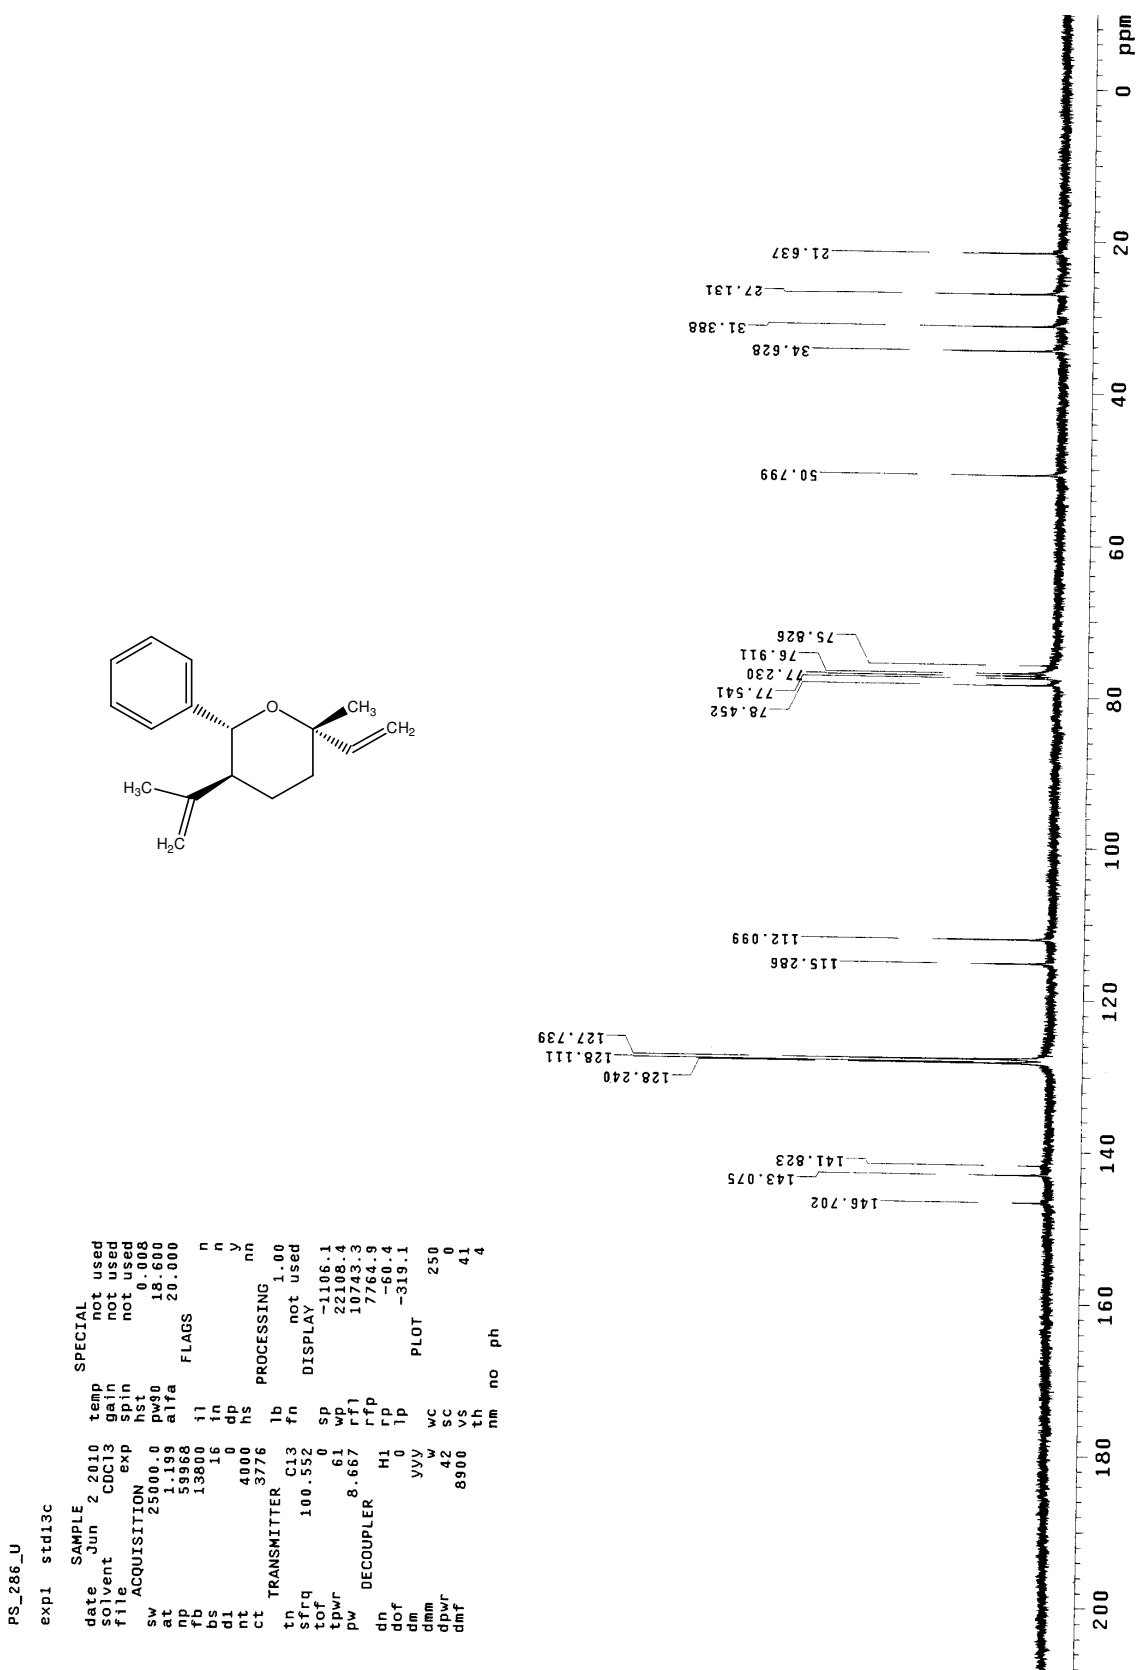



<sup>1</sup>H NMR spectra of 4e

```

PS_299H
exp1 s2pu1
SAMPLE
date Dec 17 2010
solvent CDC13
file CDC13
ACQUISITION
sw 6389.8
at 1.898
np 25528
fb not used
bs 8
di 1.000
nt 100
ct TRANSMITTER H1
tn 399.853
sfrq 362.8
tof 57
tpwr 9.650
pw DECOUPLER C13
dn 0
dm 0
dimm C
dpmf 50
dnt 15900
SPECIAL
temp not used
gain not used
spin not used
hst 0.008
pws0 19.700
alfa 20.080
FLAG
n
y
nm
0.10
65536
DISPLAY
-122.1
4240.2
793.7
109.5
-88.1
250
45
25
nm cdc ph
    
```

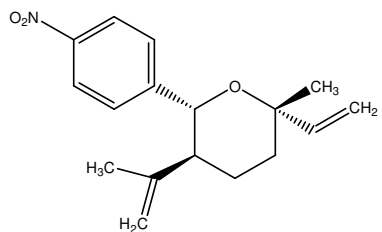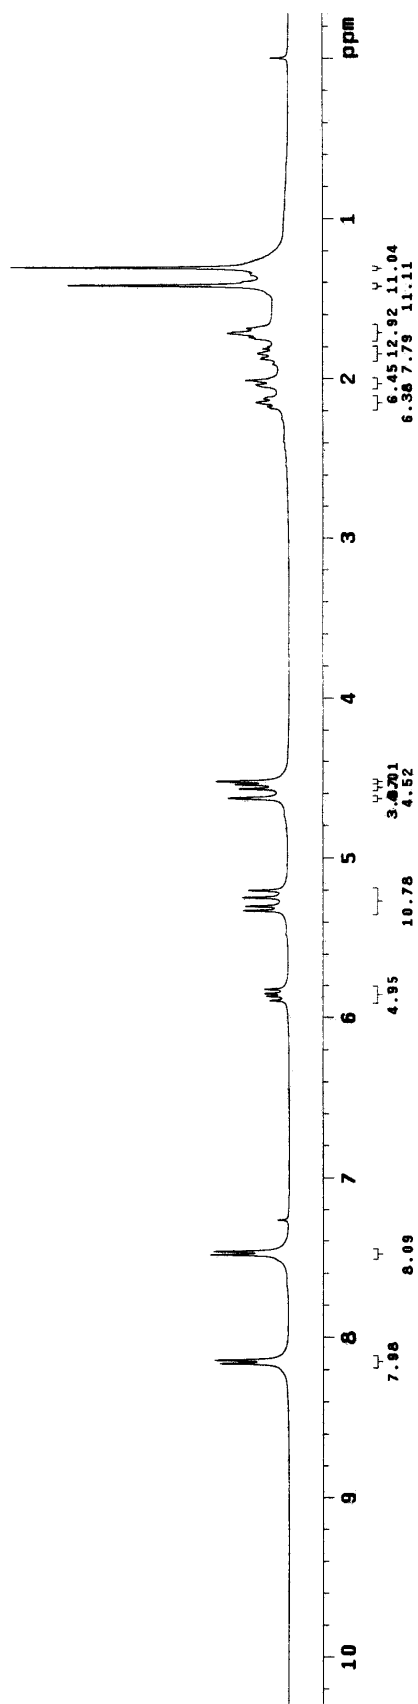

<sup>13</sup>C NMR spectra of 4e

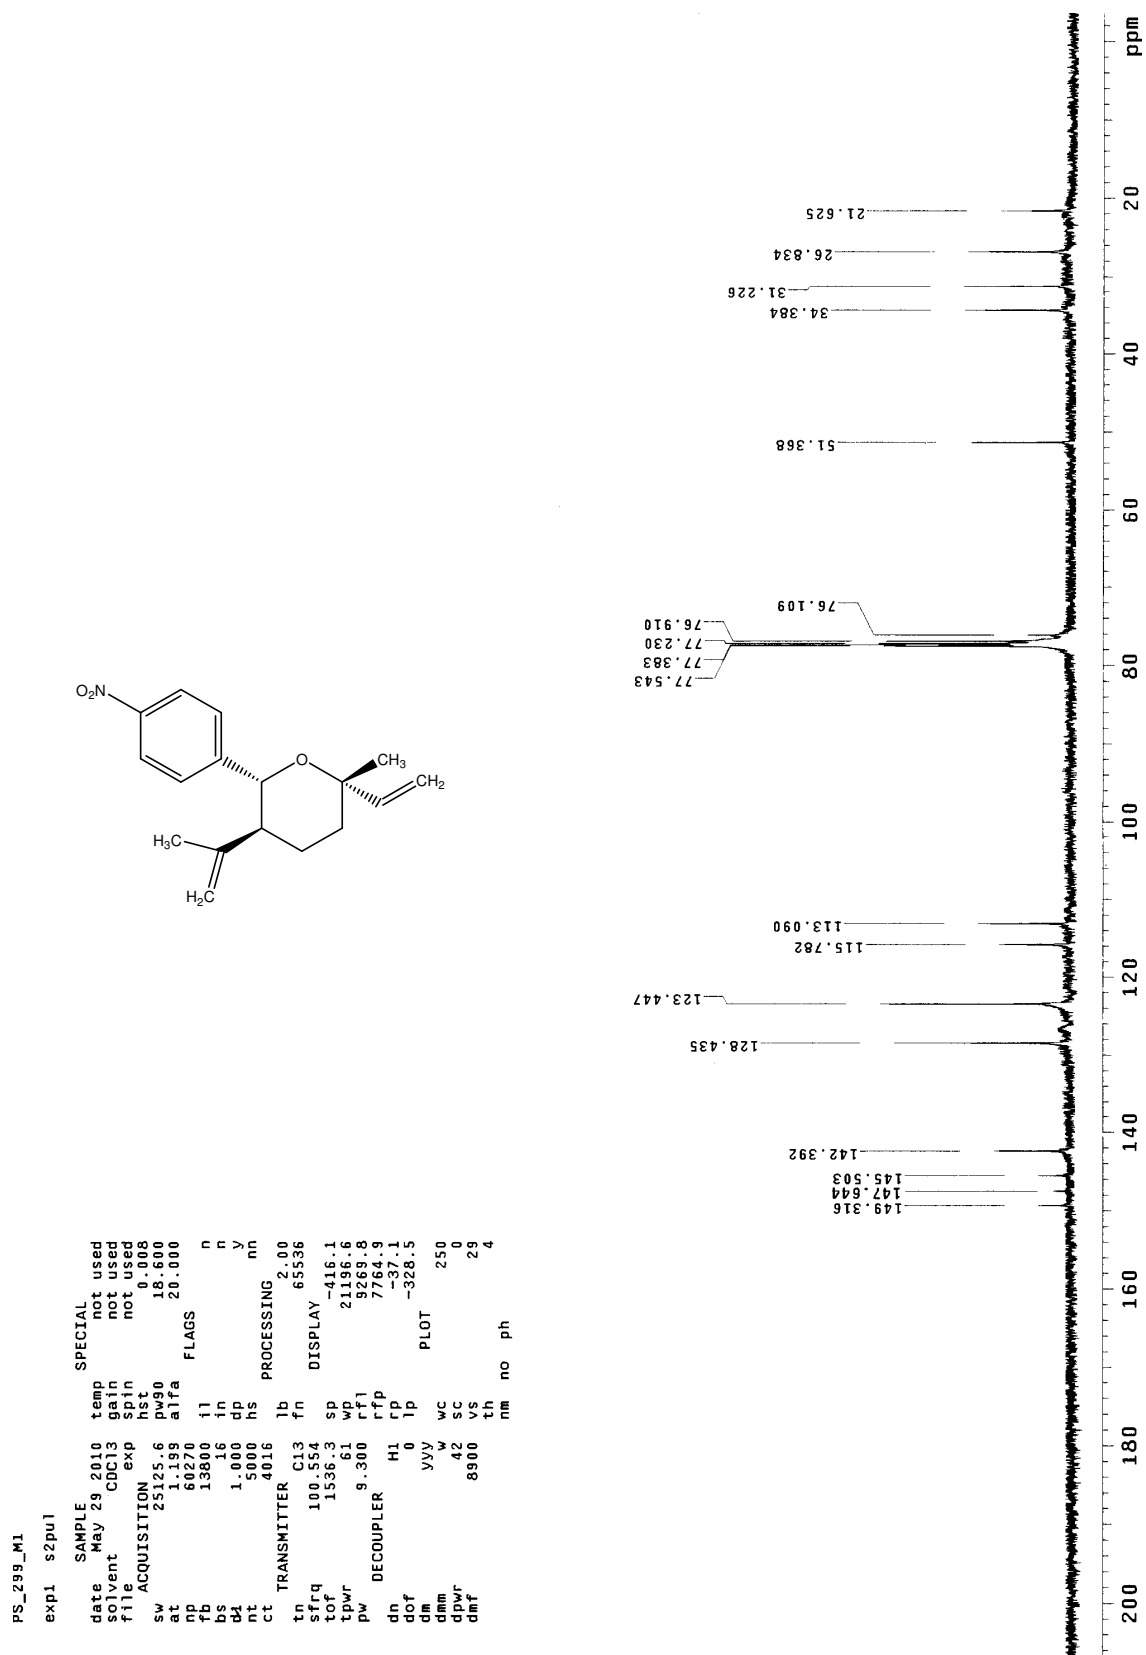



<sup>13</sup>C NMR spectra of 4n

```

PS_221_U
exp1 s2pul
SAMPLE
date Dec 24 2009 temp not used
solvent CDCl3 gain not used
file /export/home/~ spin not used
asaikria/PS_221_U_1~ hst 0.000
pw30 18.000
alpha 20.000
ACQUISITION
sw 25125.6
at 1.188 l1
np 60270 ln
fb 13800 dn
bs 16 hs
d1 1.000
nt 5000 lb
ct 2920 fn
PROCESSING
ct 85536
DISPLAY
tn -185.8
sfrq 100.554 wp
tof 1536.3 rfl
tpwr 61 rfp
pw 9.300 rp
DECOUPLER
dn HI
dof 0 wc
dm YYY sc
dmm w vs
dpwr 42 th
dmf 8900 nm no ph
    
```

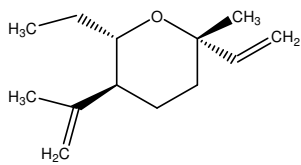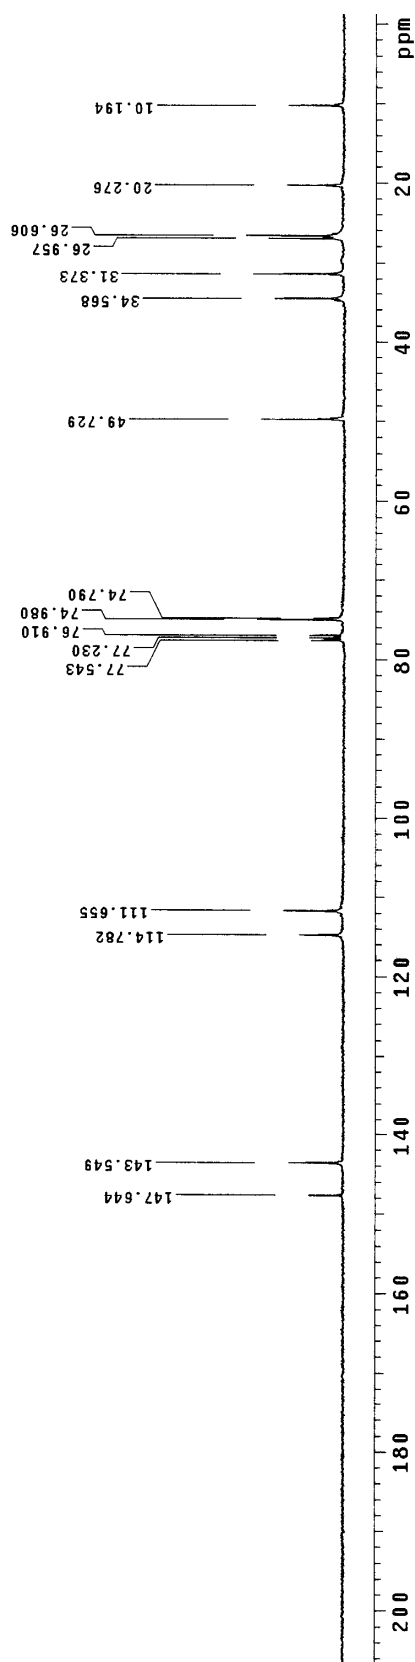

### <sup>1</sup>H NMR spectra of 4o & 5o

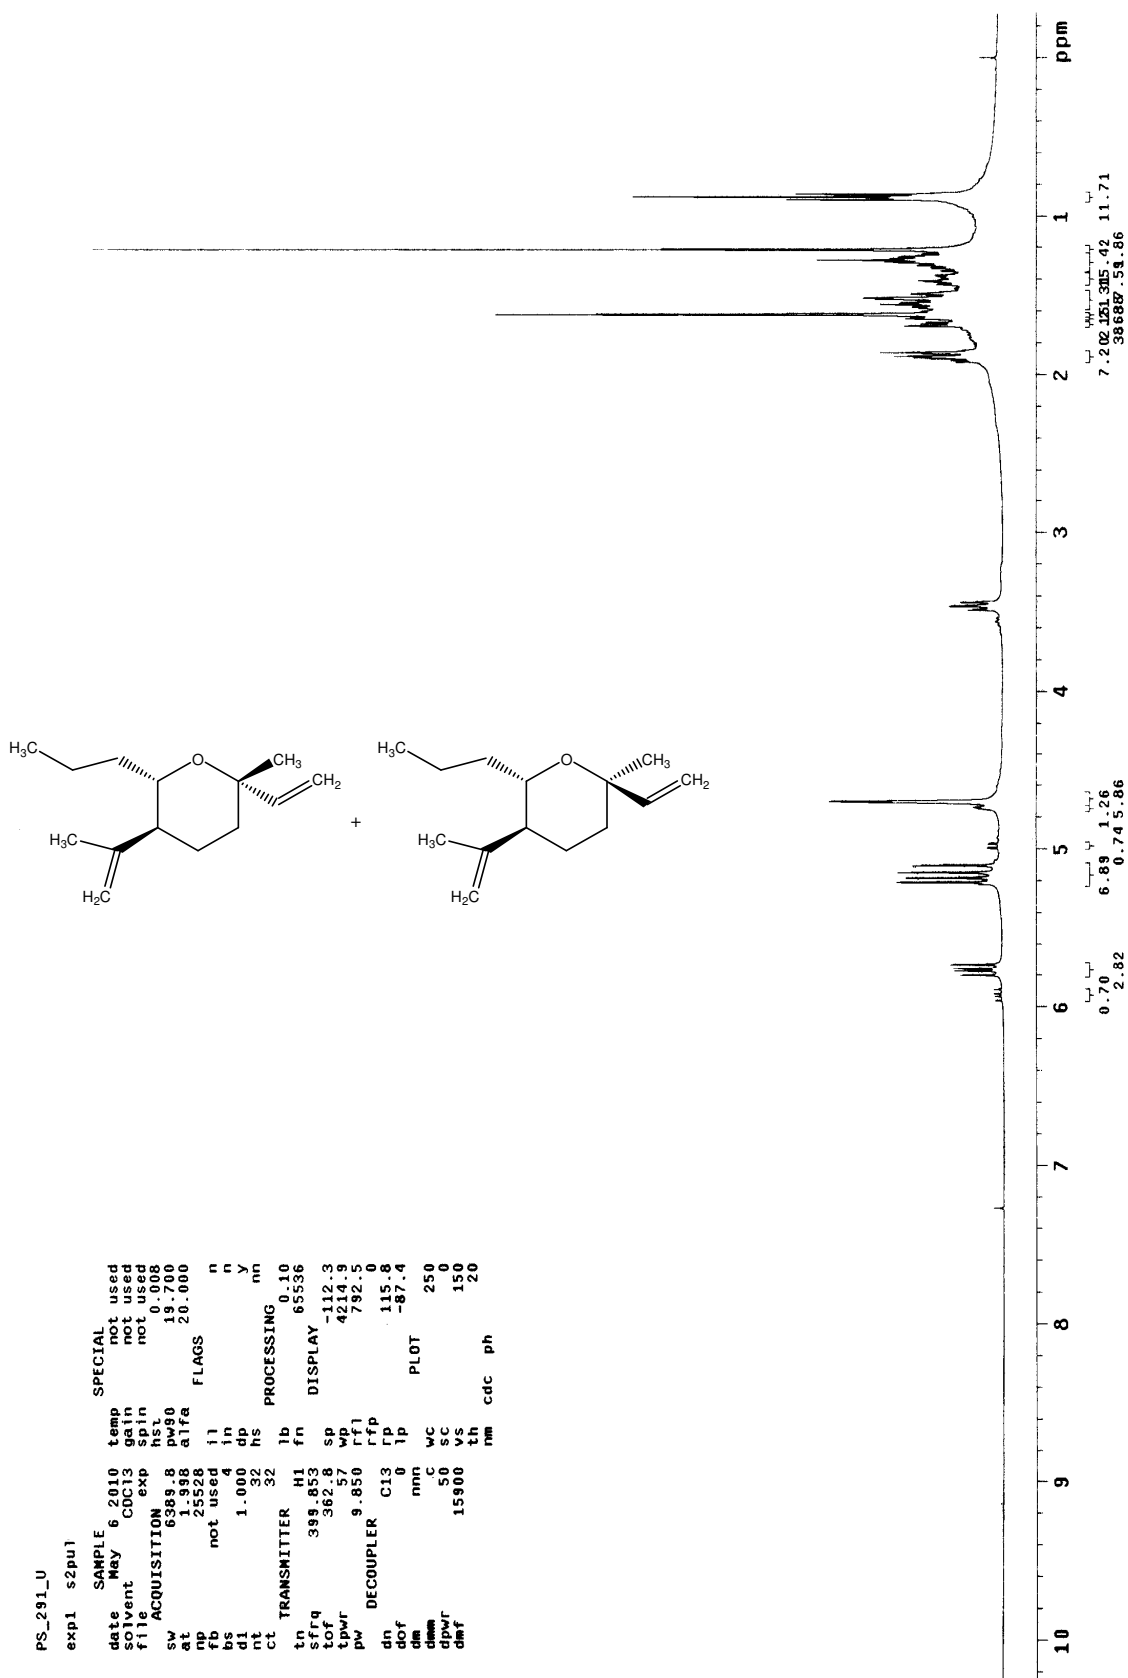

<sup>13</sup>C NMR spectra of 4o

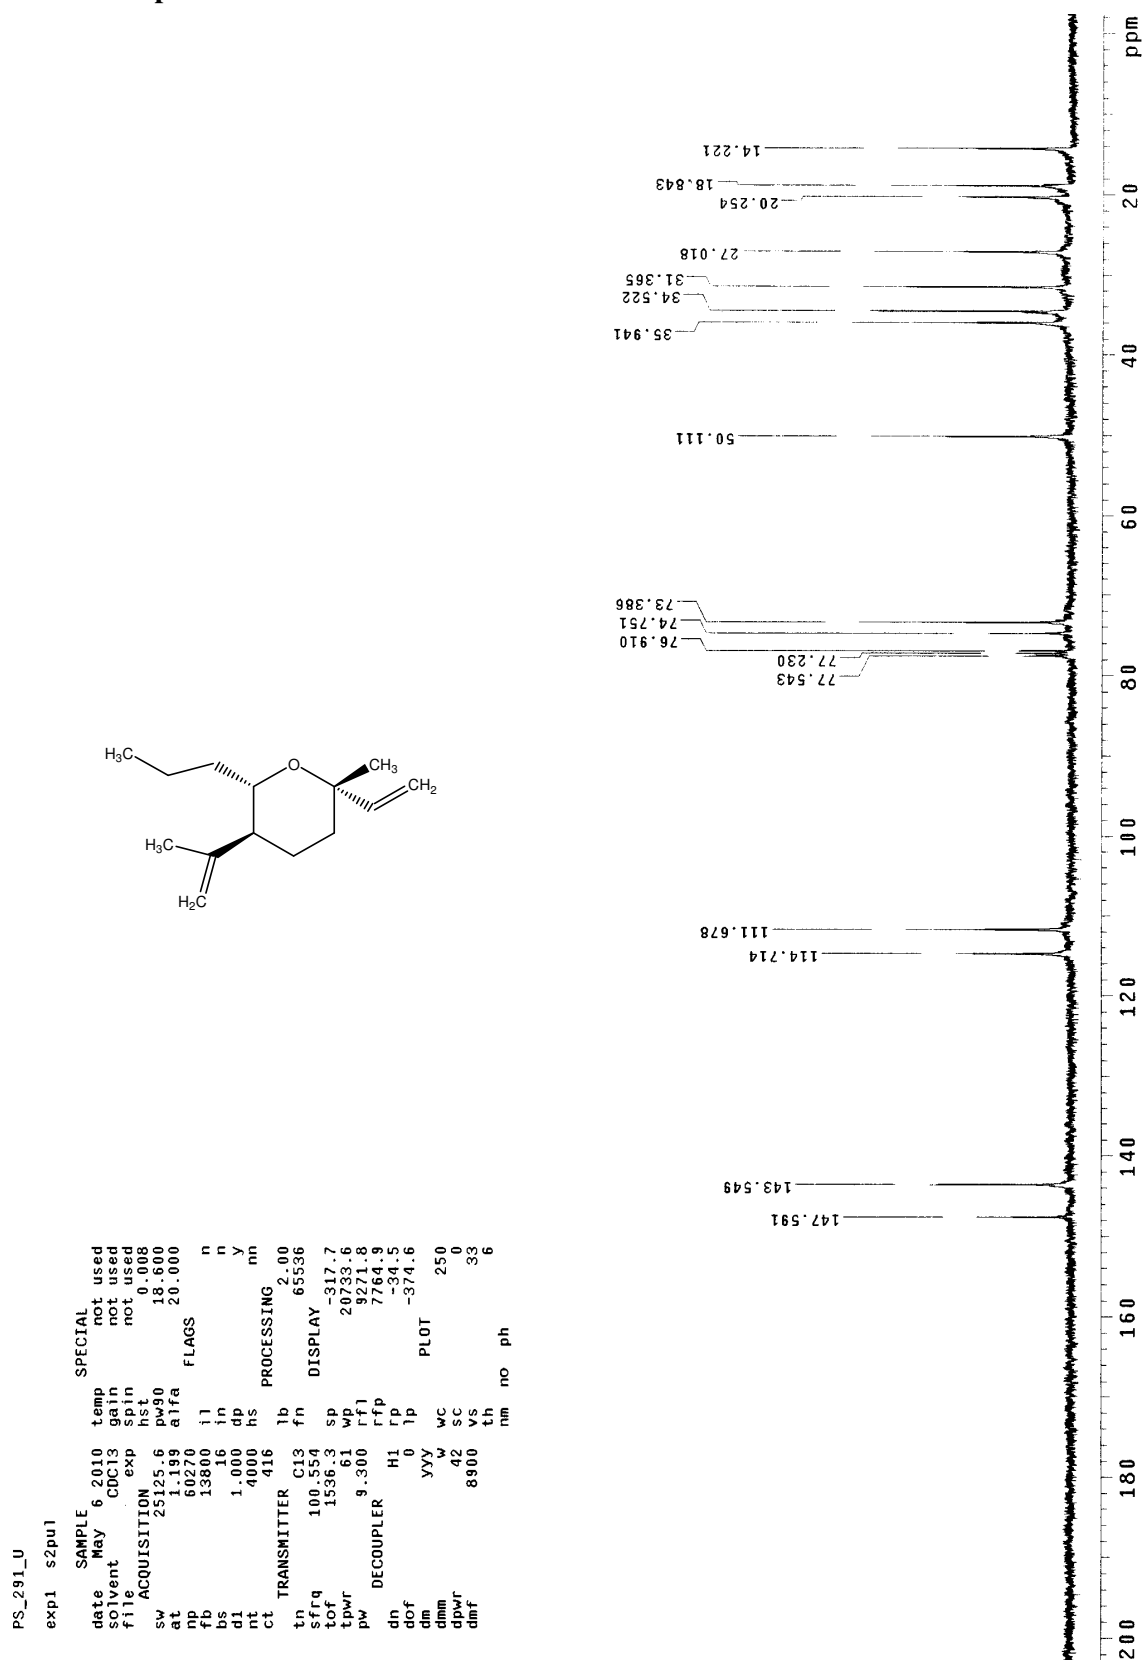

### <sup>1</sup>H NMR spectra of 4p & 5P

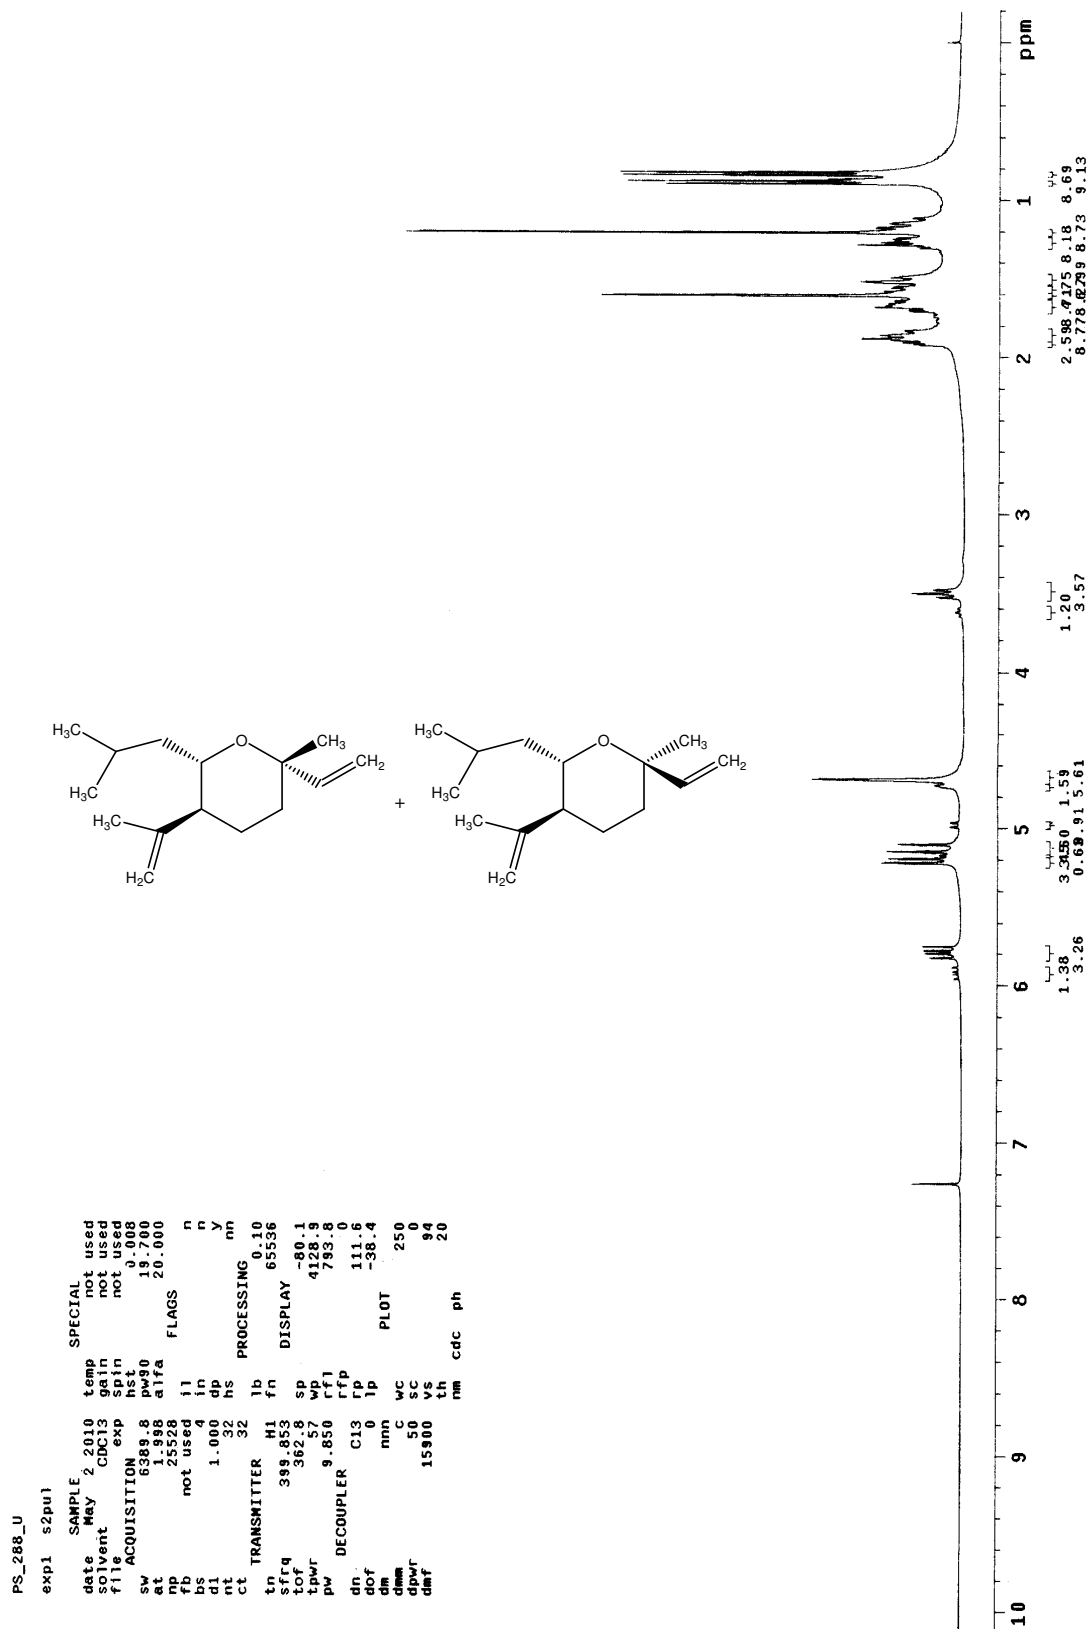

<sup>13</sup>C NMR spectra of 4p

```

PS_216M
exp1 s2pul1
date Dec 20 2009
solvent CDCl3
f1file CDC13
sw 23125.6
at 50275
pb 15670
rb 15610
d1 1.000
d2 10000
nt 16000
Ct 16000
tn 2.00
sfrq 100.554
tof 1536.3
tpwr 61
pw 9.300
dn DECOUPLER
dof H1
dm 0
dmm VVY
dppr W
dmf 42
8900
nm no ph
SPECIAL
temp not used
gain not used
spin not used
nst 0.008
pw90 18.000
alpha 20.000
FLAGS
n
y
m
PROCESSING
lb 2.00
fn 65536
DISPLAY
sp -250.2
wp 20568.7
rf1 9270.3
rfp 7764.9
rp -88.6
lp -271.4
PLOT
wc 250
sc 0
vs 35
th 10
    
```

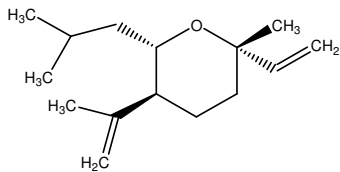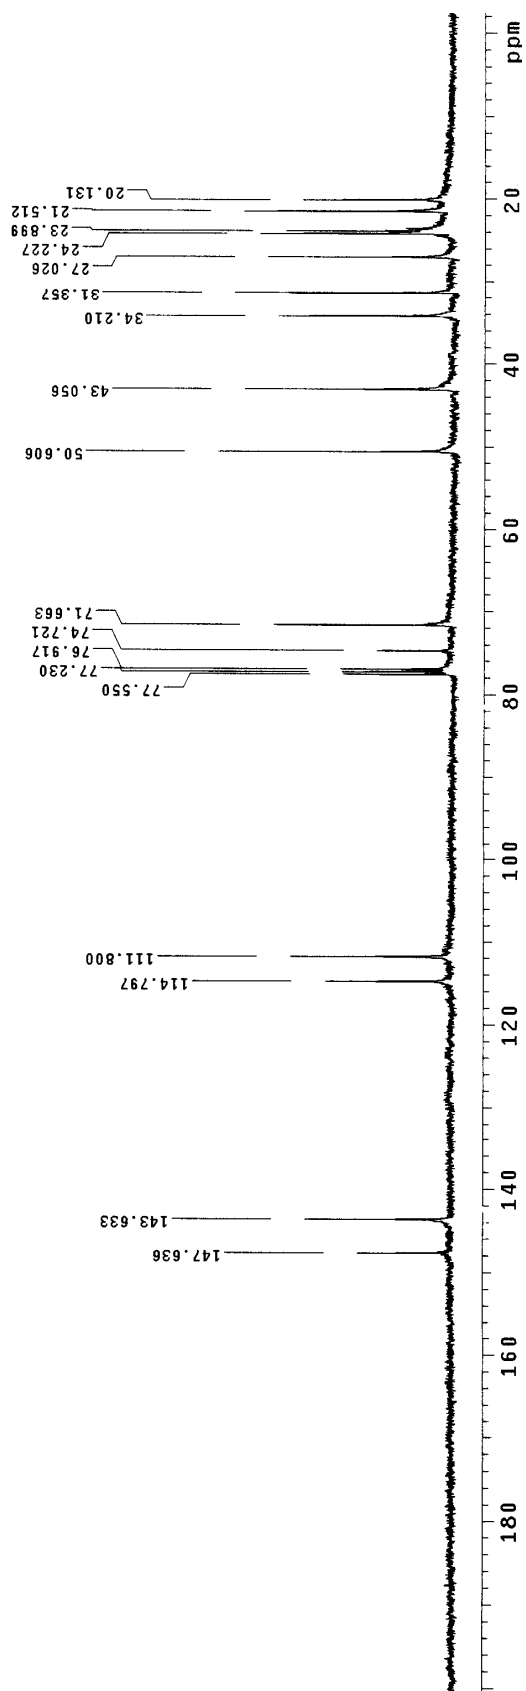



# <sup>1</sup>H NMR spectra of 4q & 5q

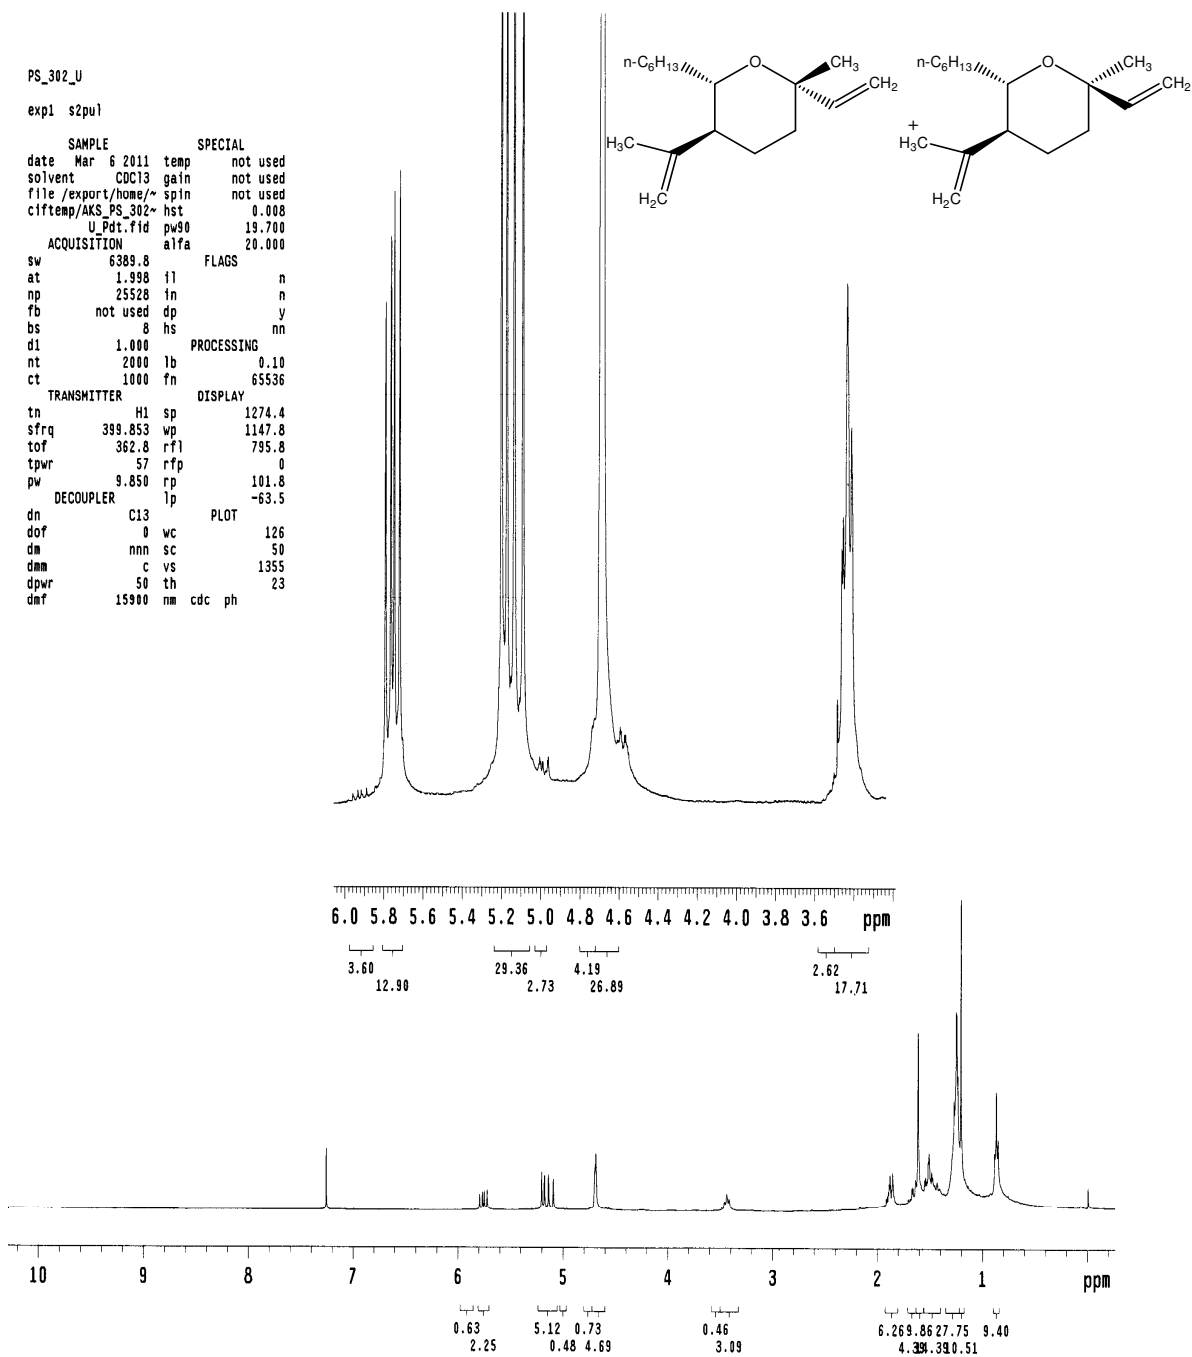

<sup>13</sup>C NMR spectra of 4q

```

PS_302_U
exp1 s2pu1
SAMPLE
date May 31 2010
solvent CDCl3
file not used
sw ACQUISITION exp not used
at 25125.6 hz n
np 60270 t1 20.000
fb 19800 t1 n
bs 16 t1 n
d1 1.000 dp n
nt 4000 hs n
ct 1056
TRANSMITTER
tn C13
strq 100.554 fb 2.00
tof 1536.3 fn 65536
tpwr 61 sp -413.8
pw 9.300 rfl 21262.5
d1 DECOUPLER H1 rfp 9267.5
dof 0 rp -57.5
dmm yyy w PLOT -322.6
dmm w WC 250
dpr 42 SC 0
dmf 8900 t1 21
nm no ph 5
    
```

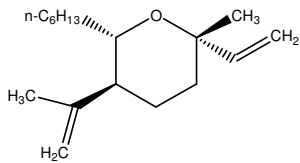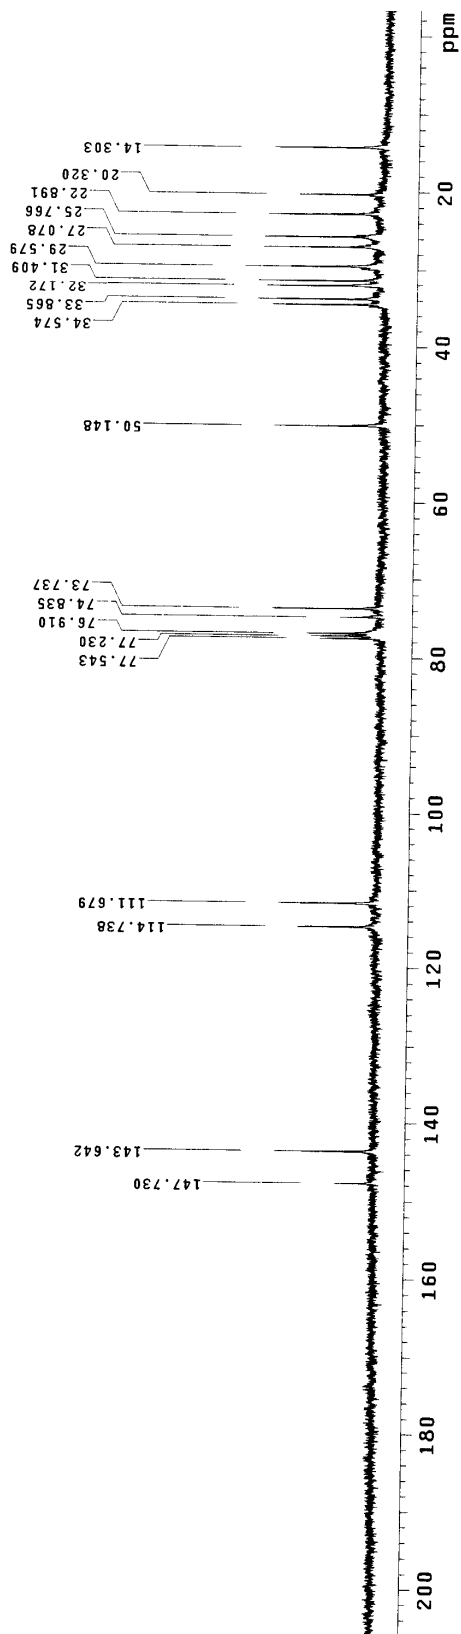

# <sup>1</sup>H NMR spectra of 4r & 5r

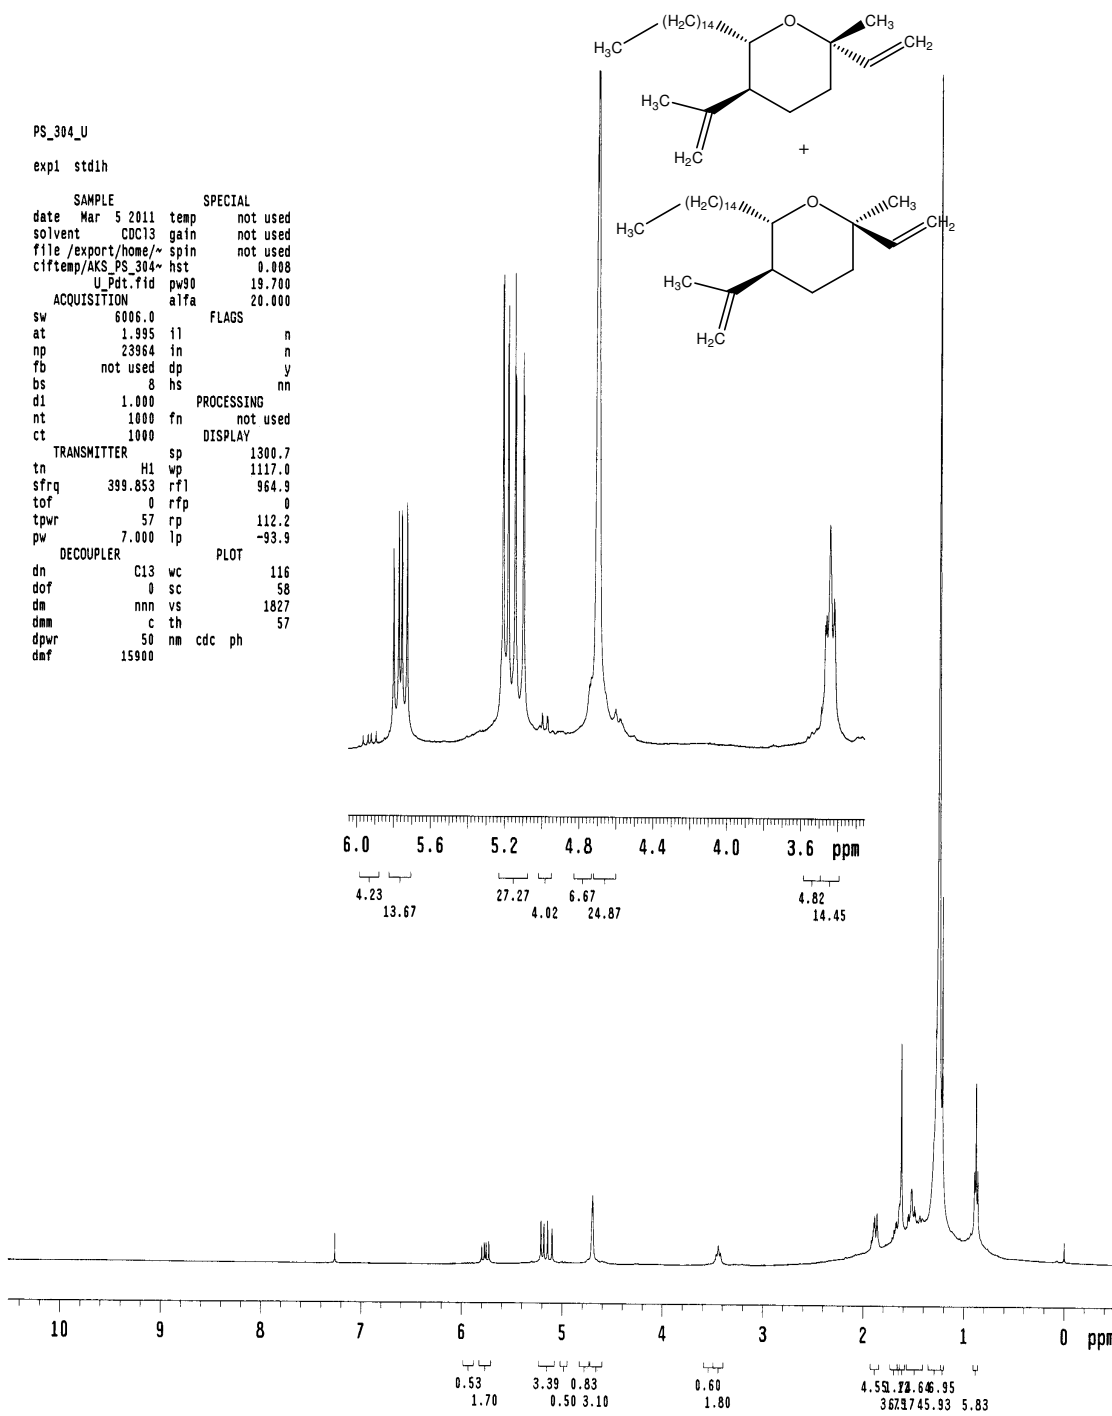

<sup>13</sup>C NMR spectra of 4r

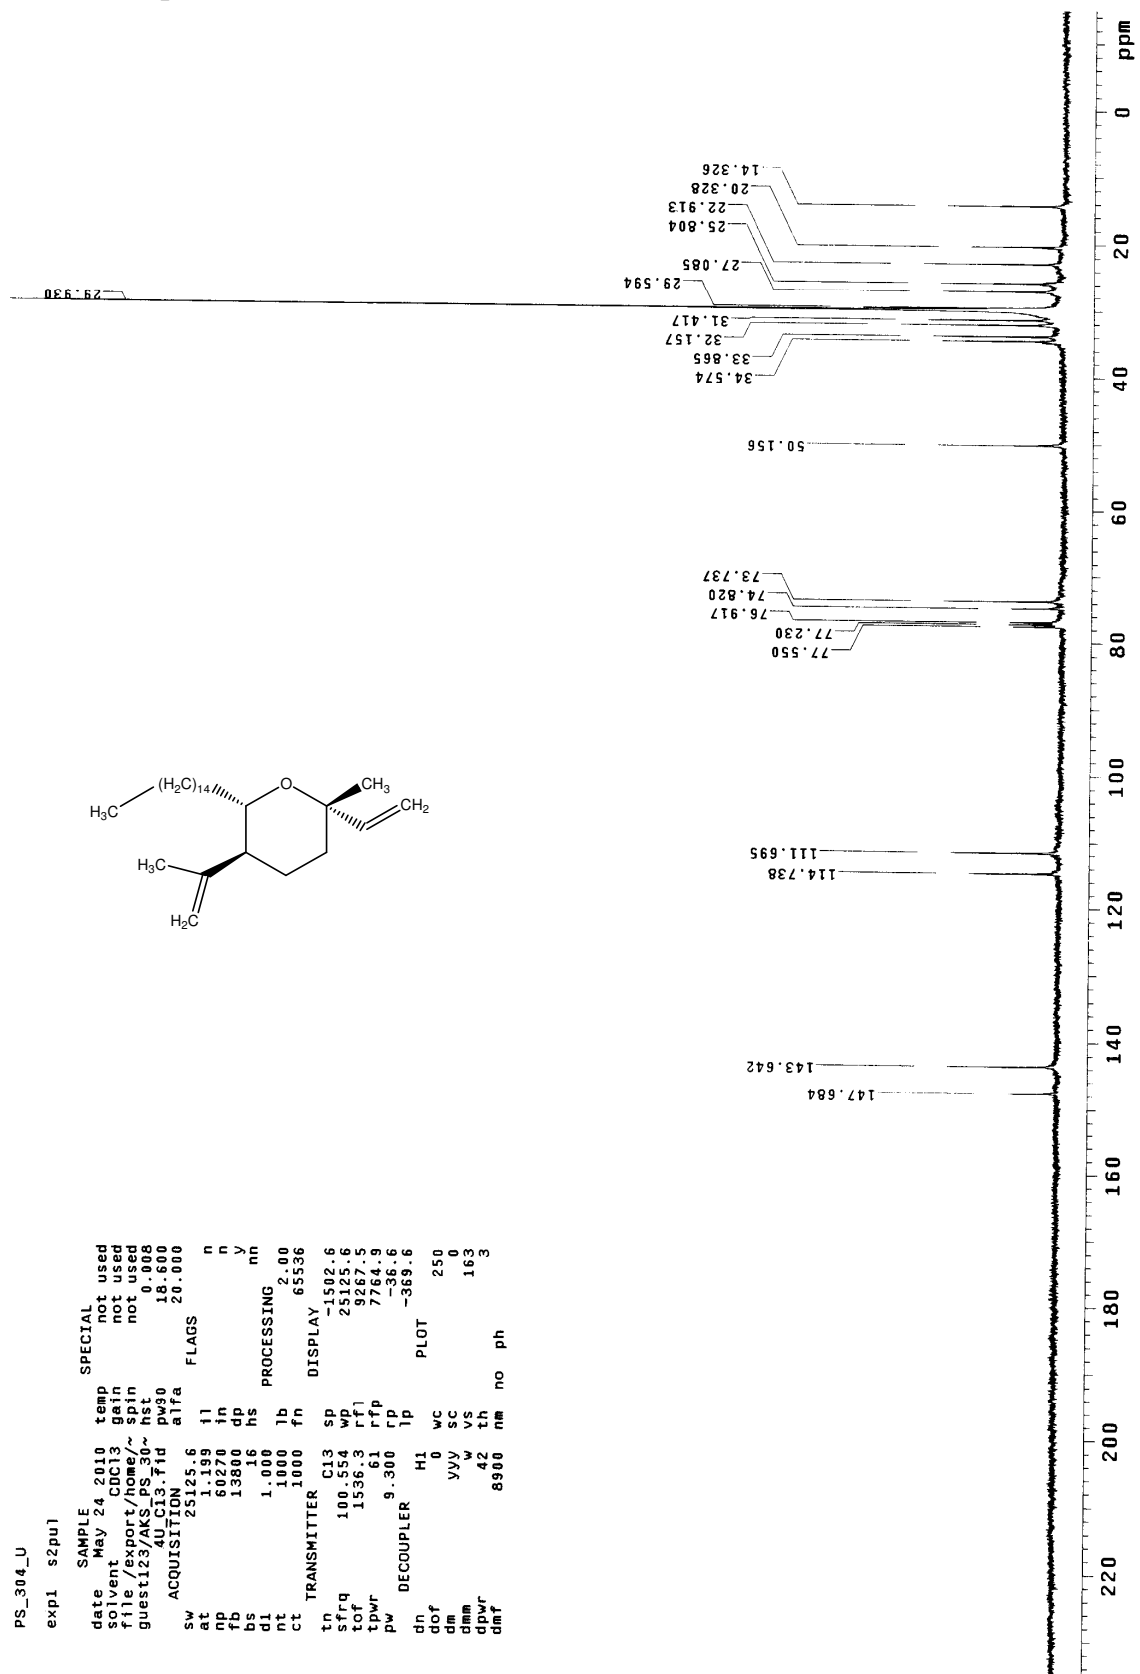

# <sup>1</sup>H NMR spectra of 15

```
PS_i68_L
exp1 s2pu1
date SAMPLE 4 2011
solvent var C6Cl3
file C6Cl3
ACQUISITION exp
sw 6389.8 hst 0.008
at 1.998 pw90 19.700
rs 2528 alfa 20.000
np not used fl n
pb not used h n
bs 1.000 dp v
d1 200 hs
ct TRANSMITTER 200
tn 0.10
sfrq 399.853 fn 65536
tof 362.9 sp -184.7
cpwr 9.850 wfl 4974.6
pw DECOUPLER C13 rfp 797.6
dn 103.2 rfp -68.8
dm 0 lp
dof nnn wc 250
dmm C
dpwr 50 sc 0
dmf 15900 vs 56
tn cdc ph 20
```

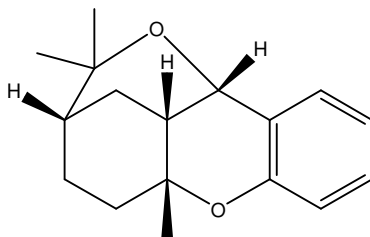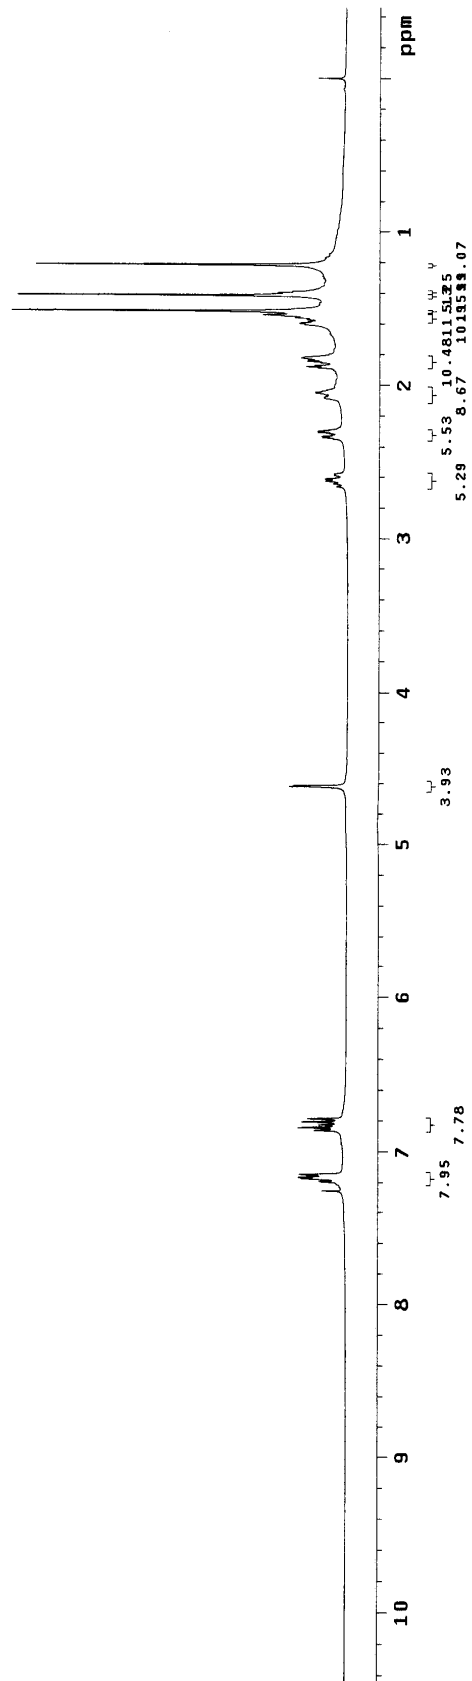

<sup>13</sup>C NMR spectra of 15

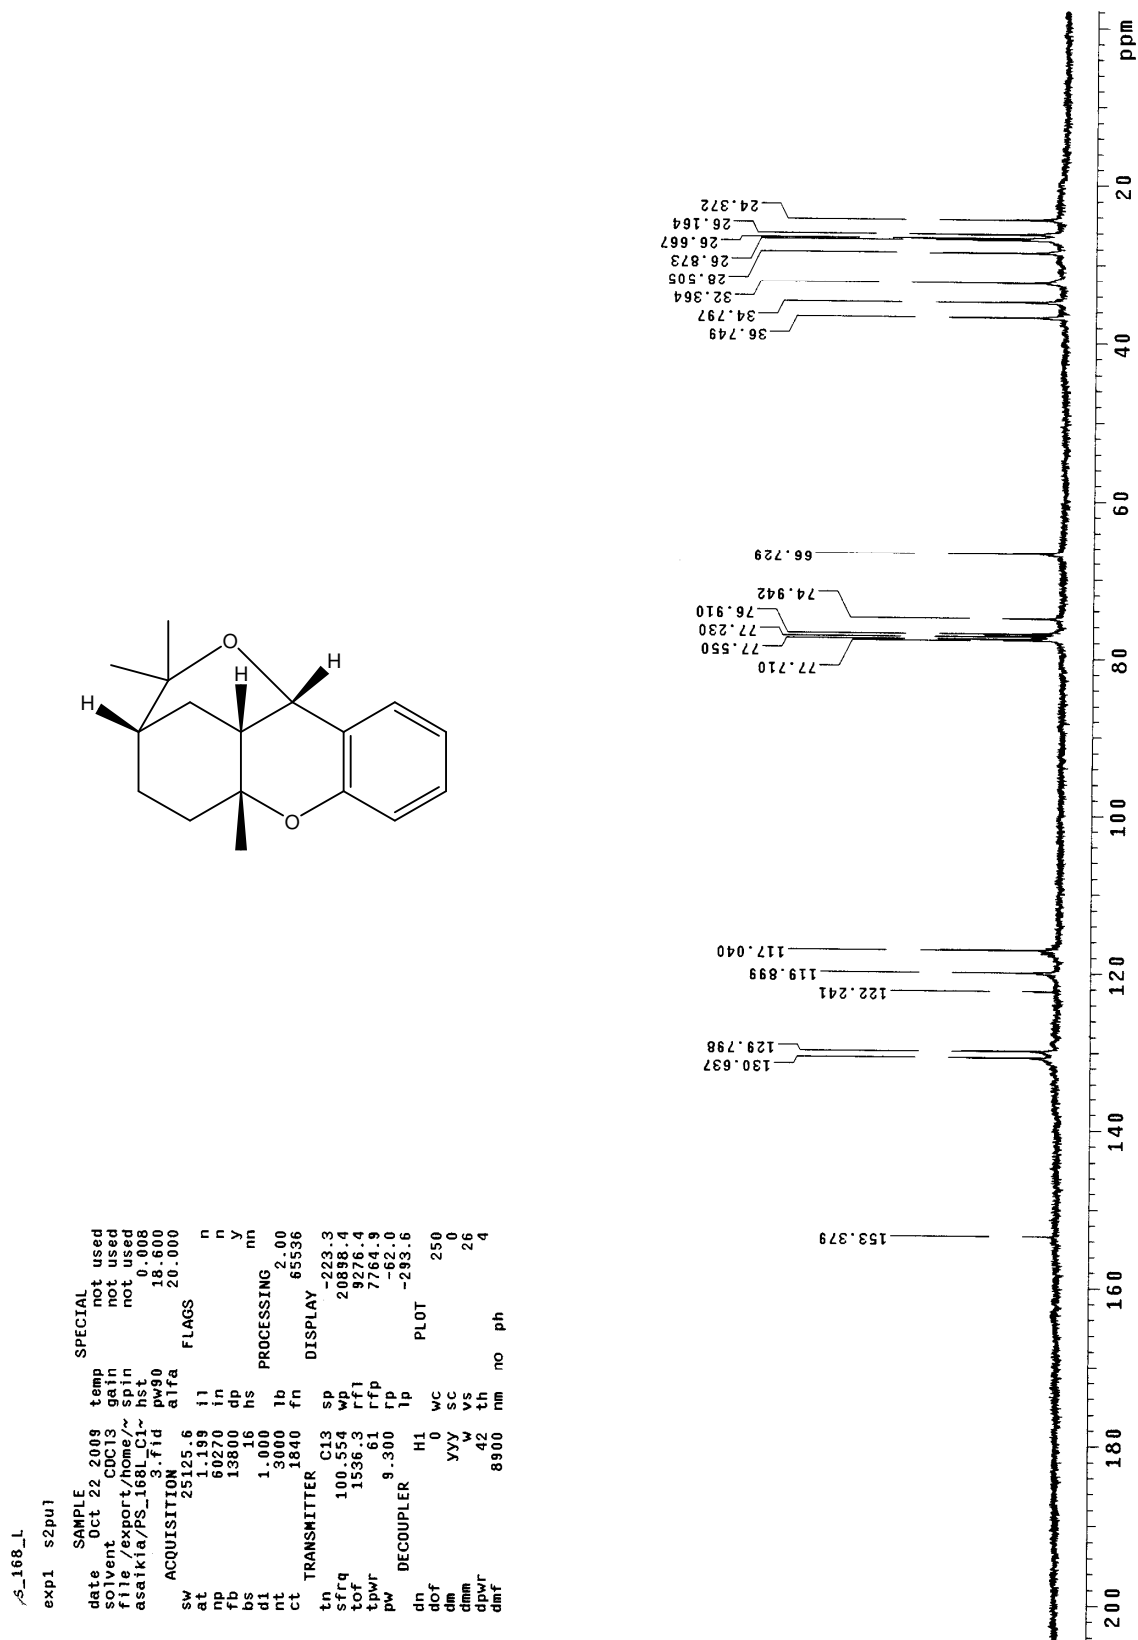

<sup>1</sup>H NMR spectra of 17b

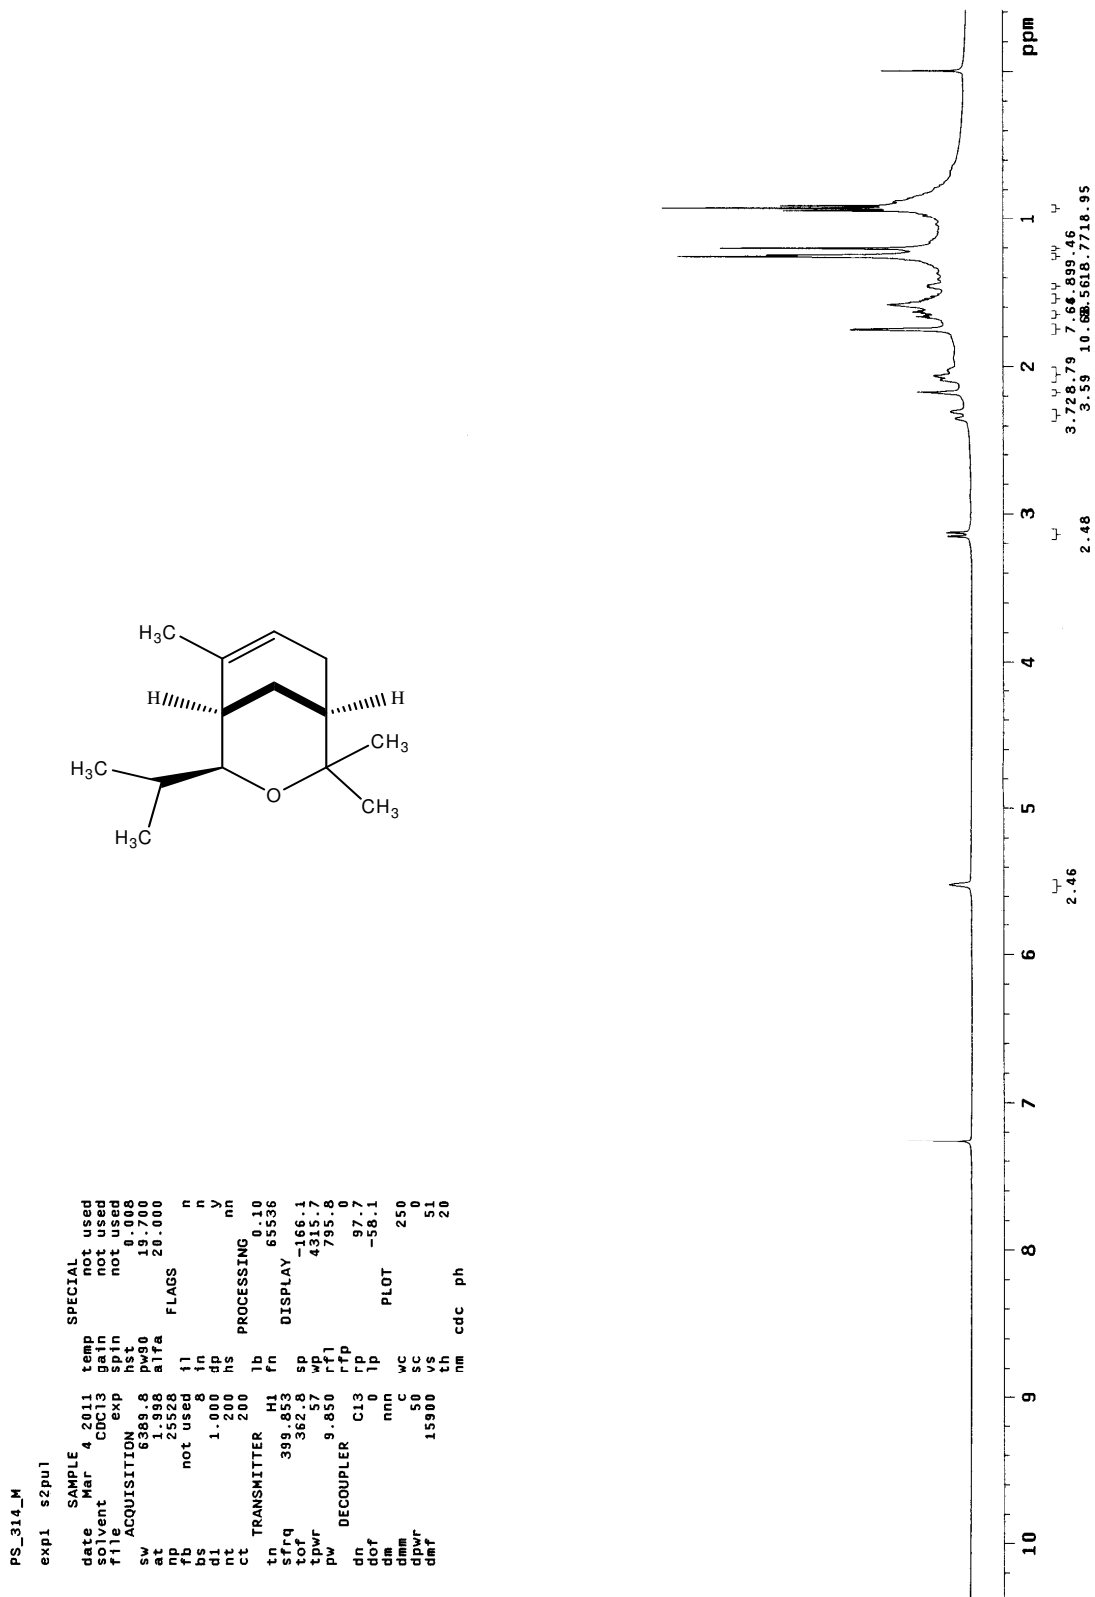









<sup>1</sup>H NMR spectra of 18d & 19d

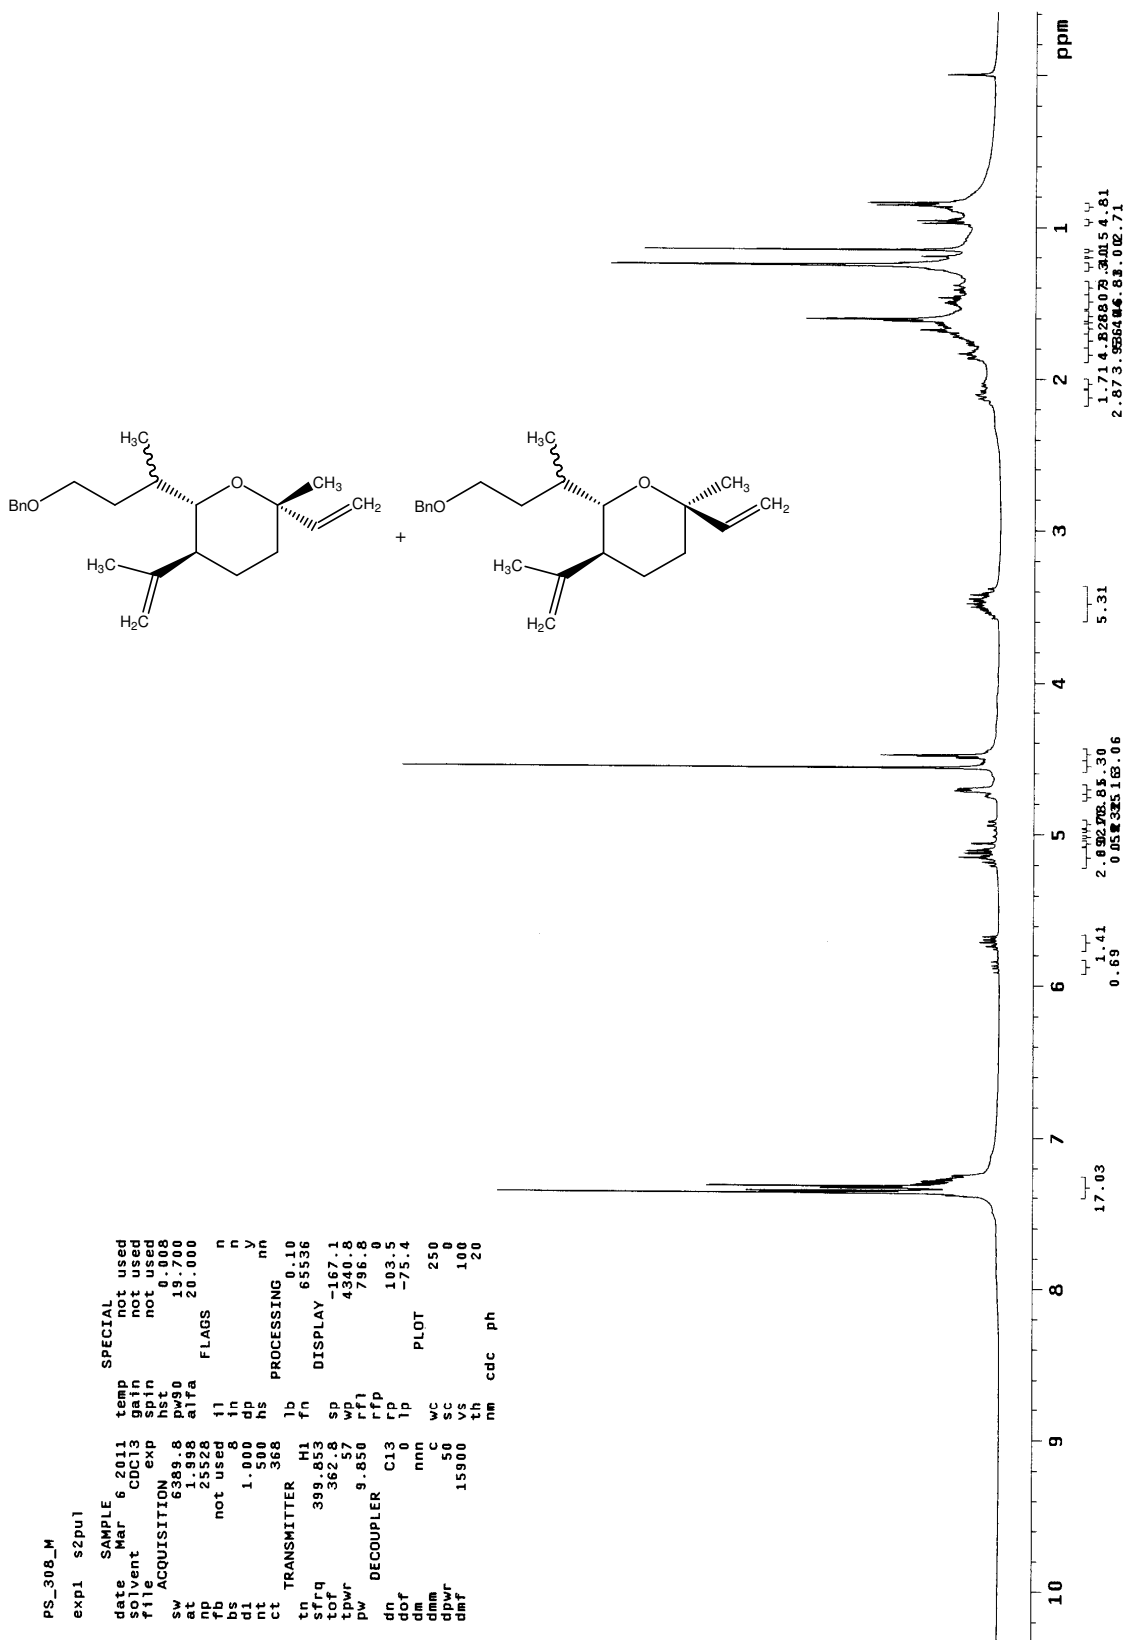

<sup>13</sup>C NMR spectra of 18d

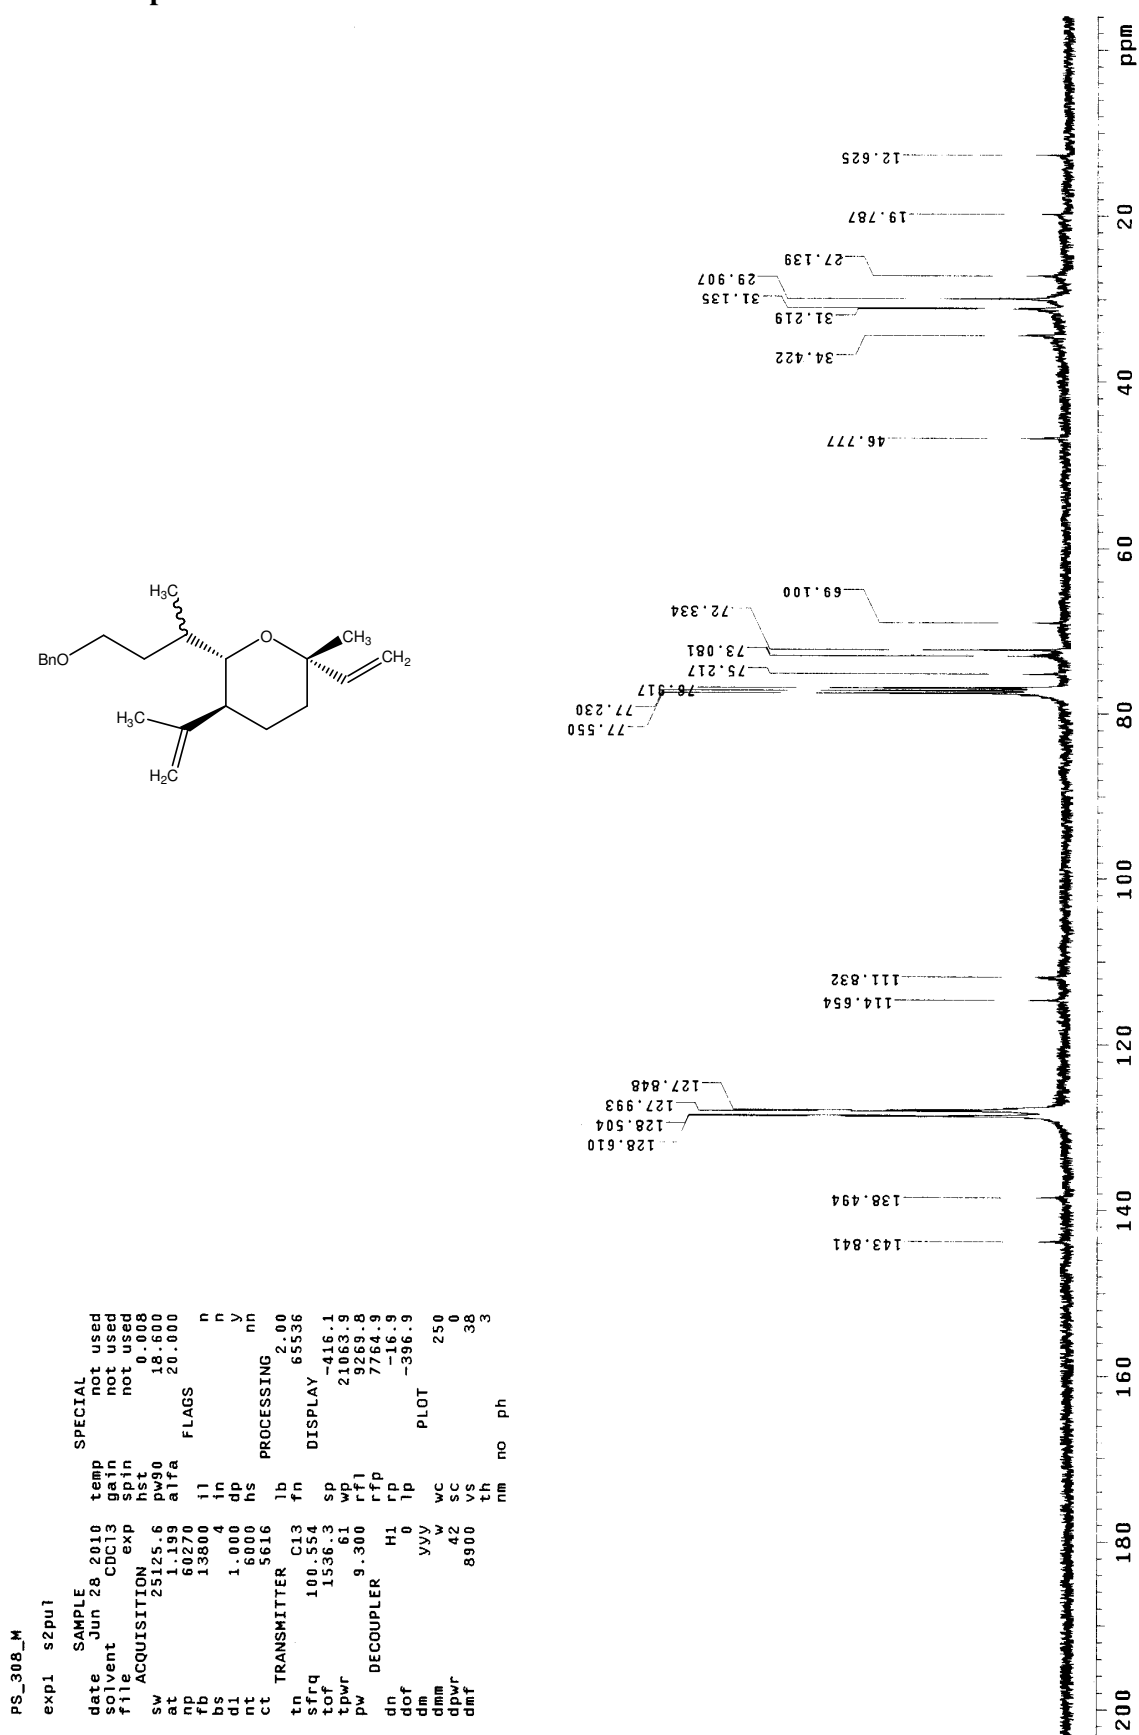



<sup>13</sup>C NMR spectra of 18e & 19e

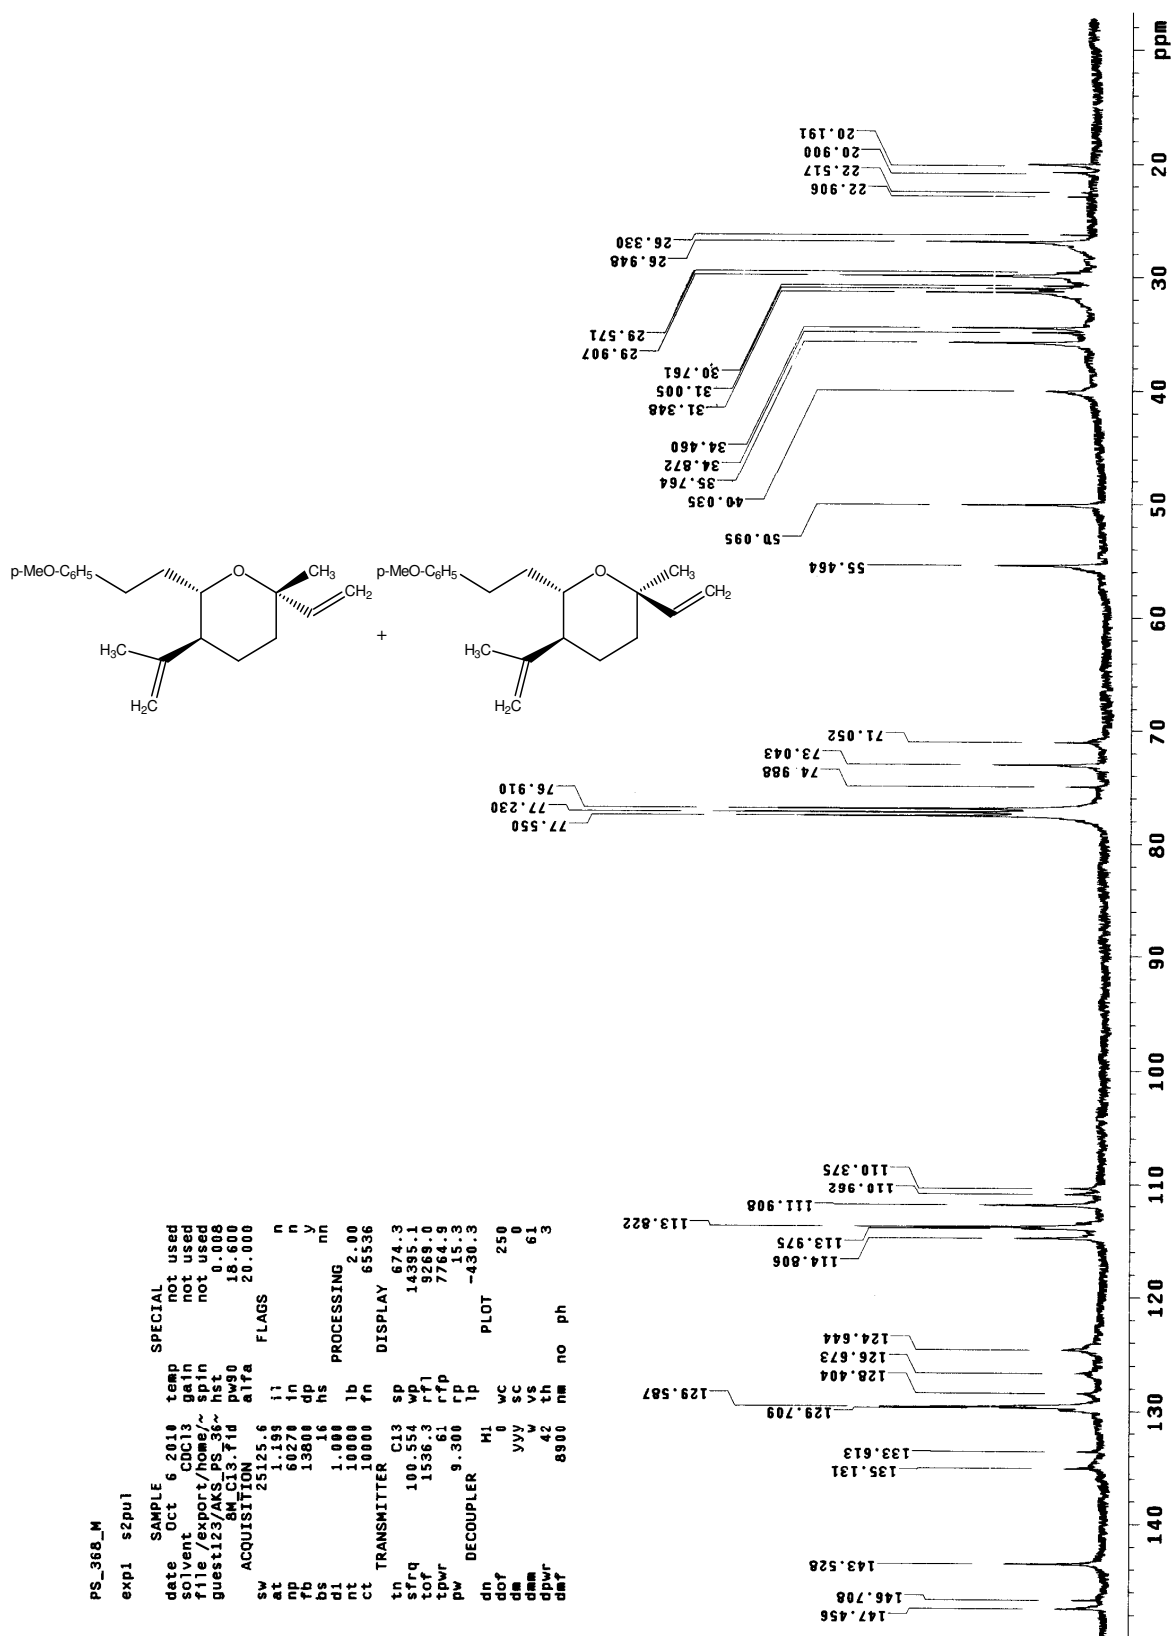



<sup>13</sup>C NMR spectra of 18f & 19f

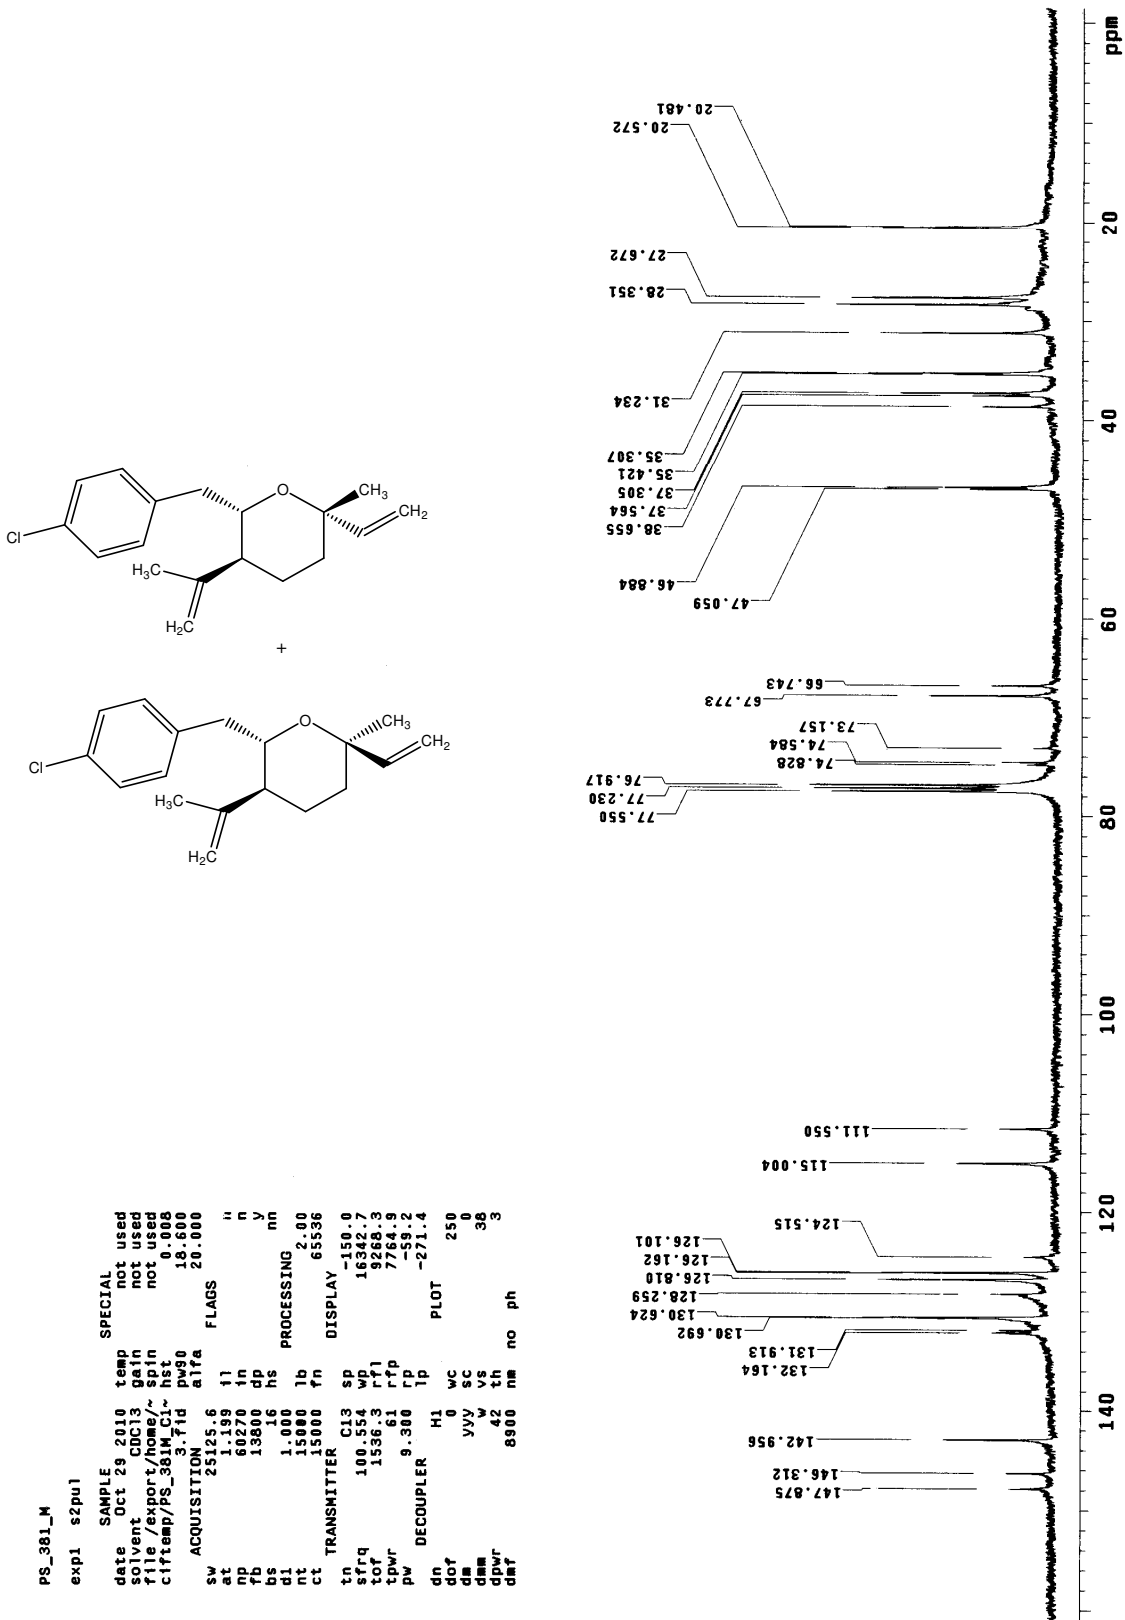



<sup>1</sup>H NMR spectra of 18g & 19g

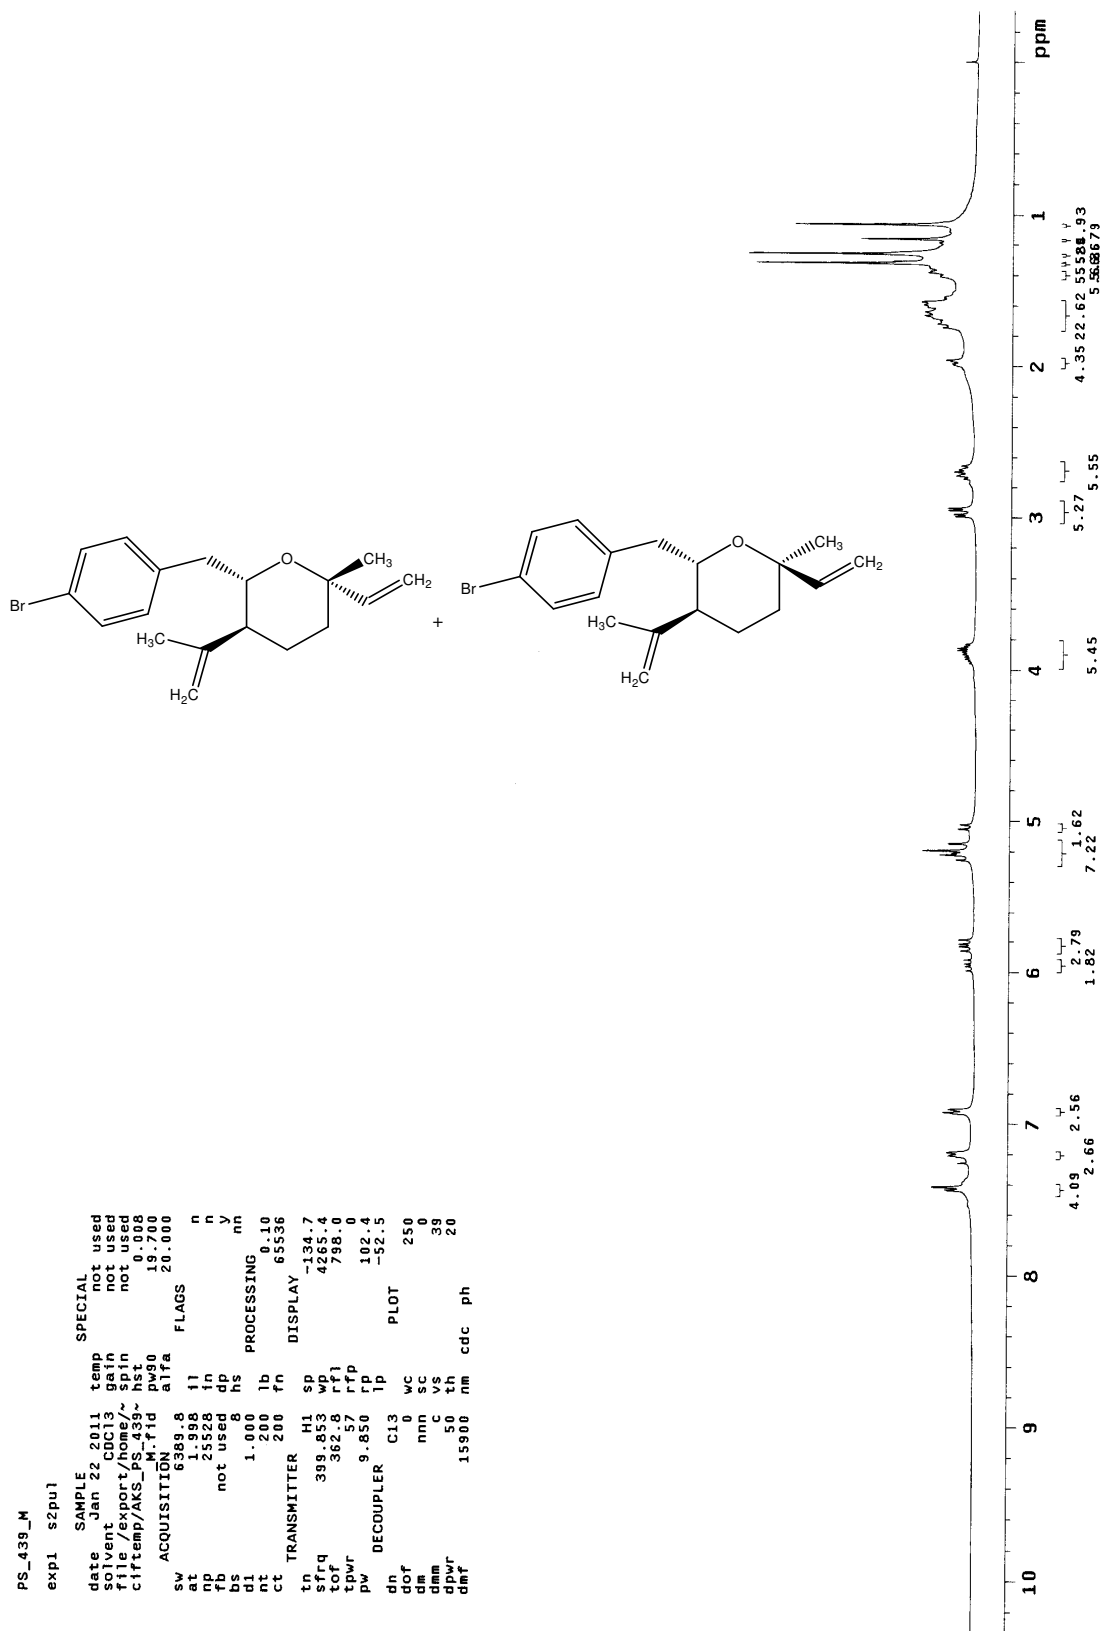

<sup>13</sup>C NMR spectra of 18g & 19g

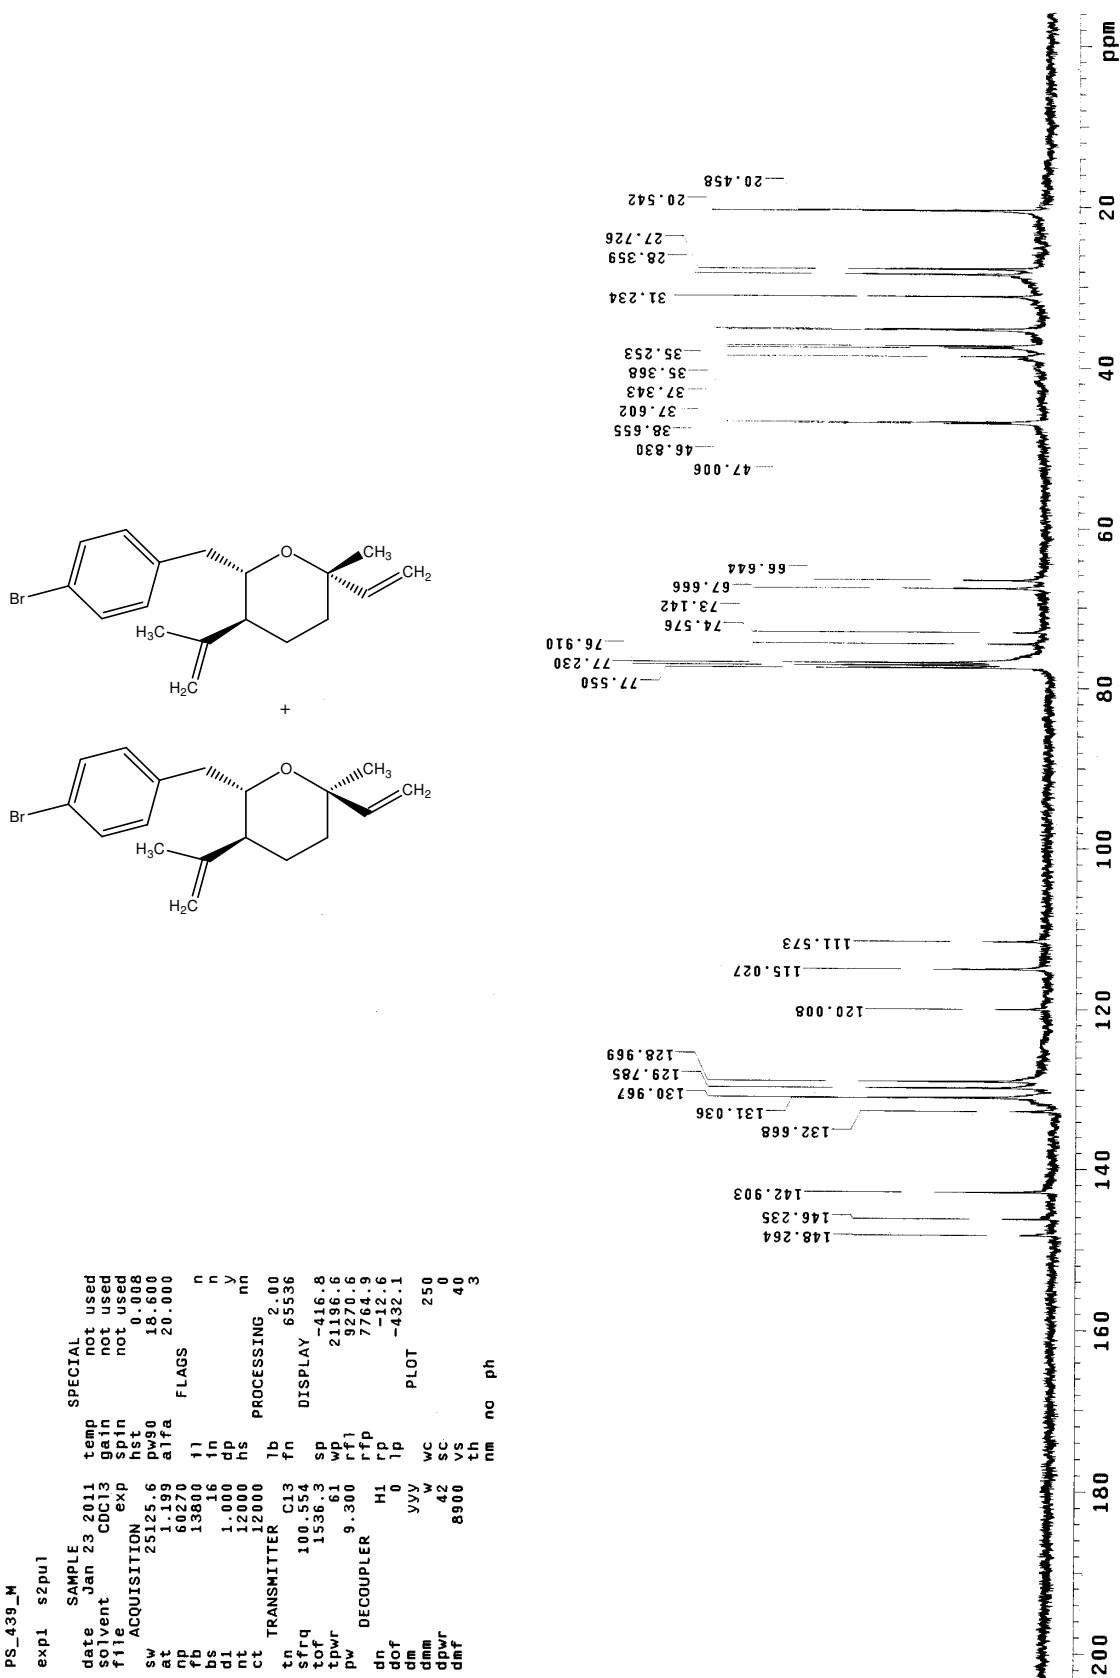

**Crude  $^1\text{H}$  NMR spectra showing 3n, 4n & 5n are in the ratio 1:3:1**

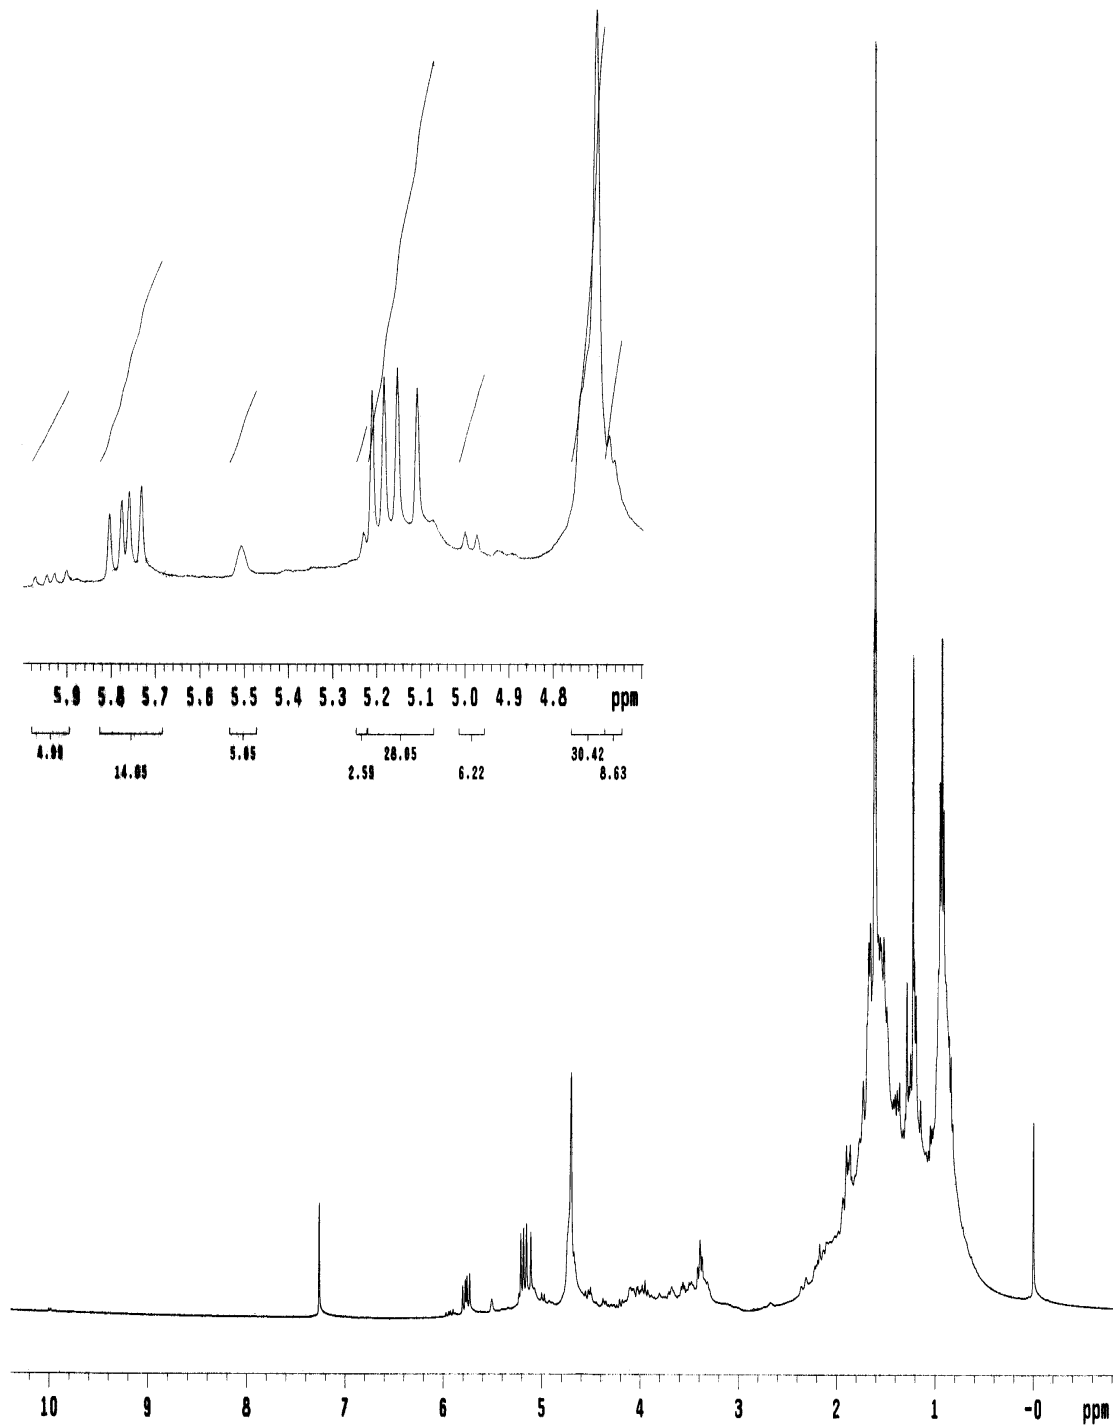

### NOESY spectra of 3a

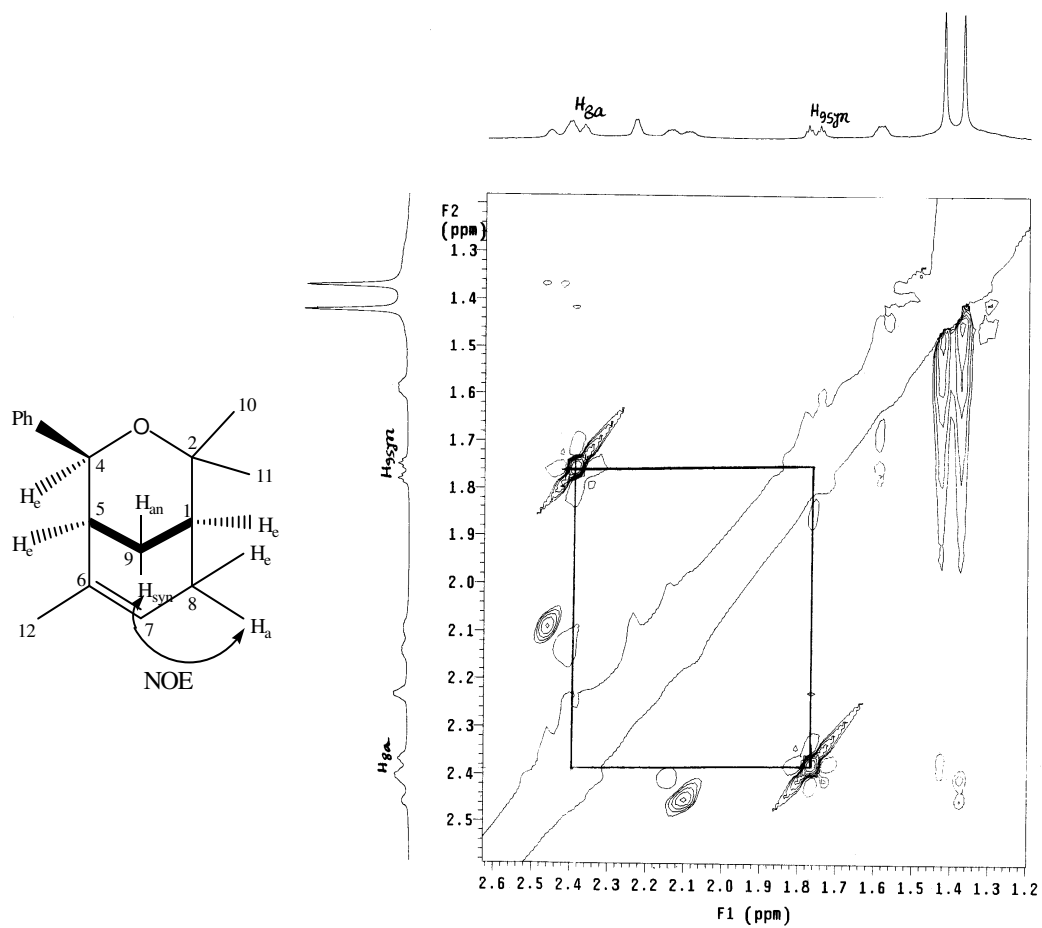

### NOESY spectra of 4e

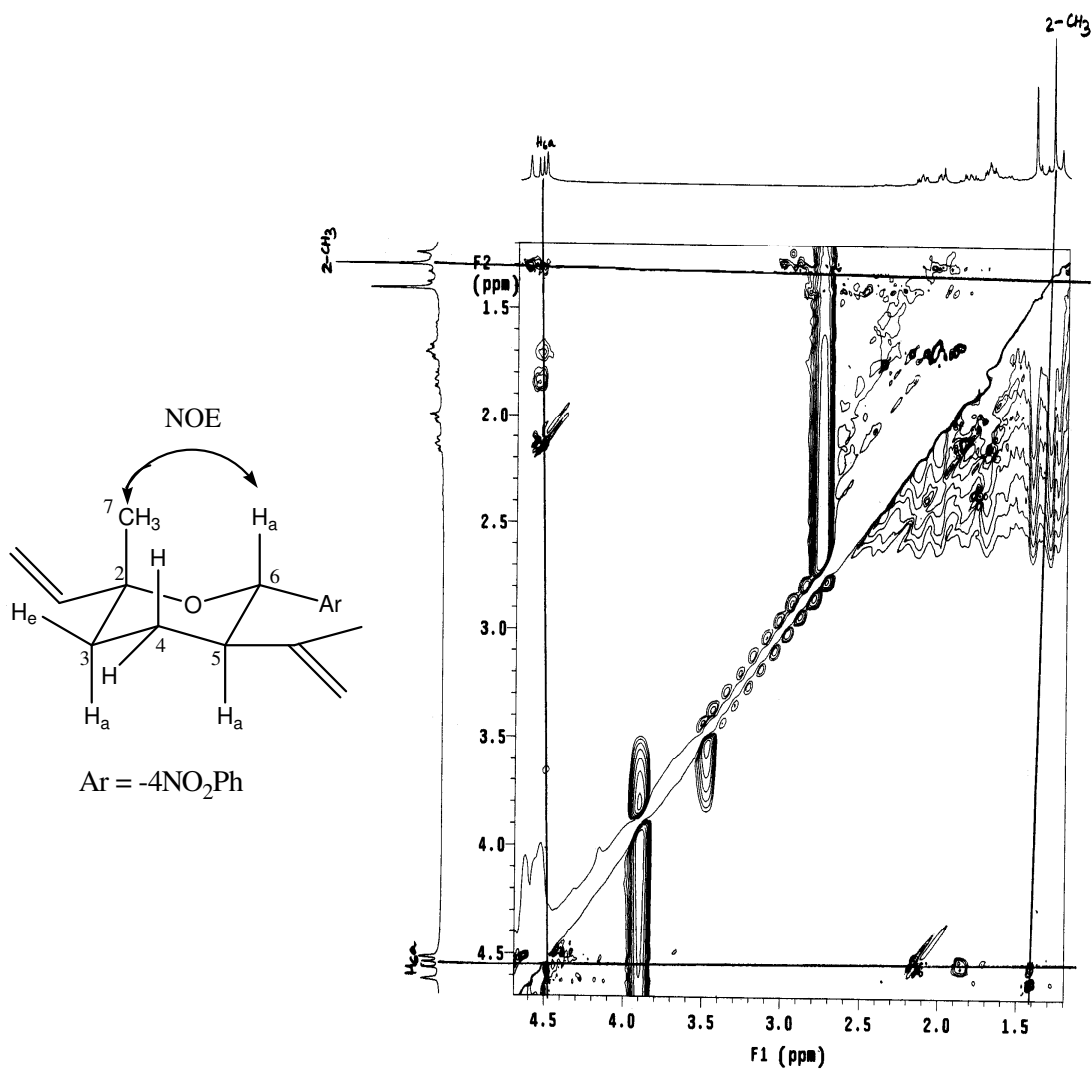

## NOESY spectra of 4e

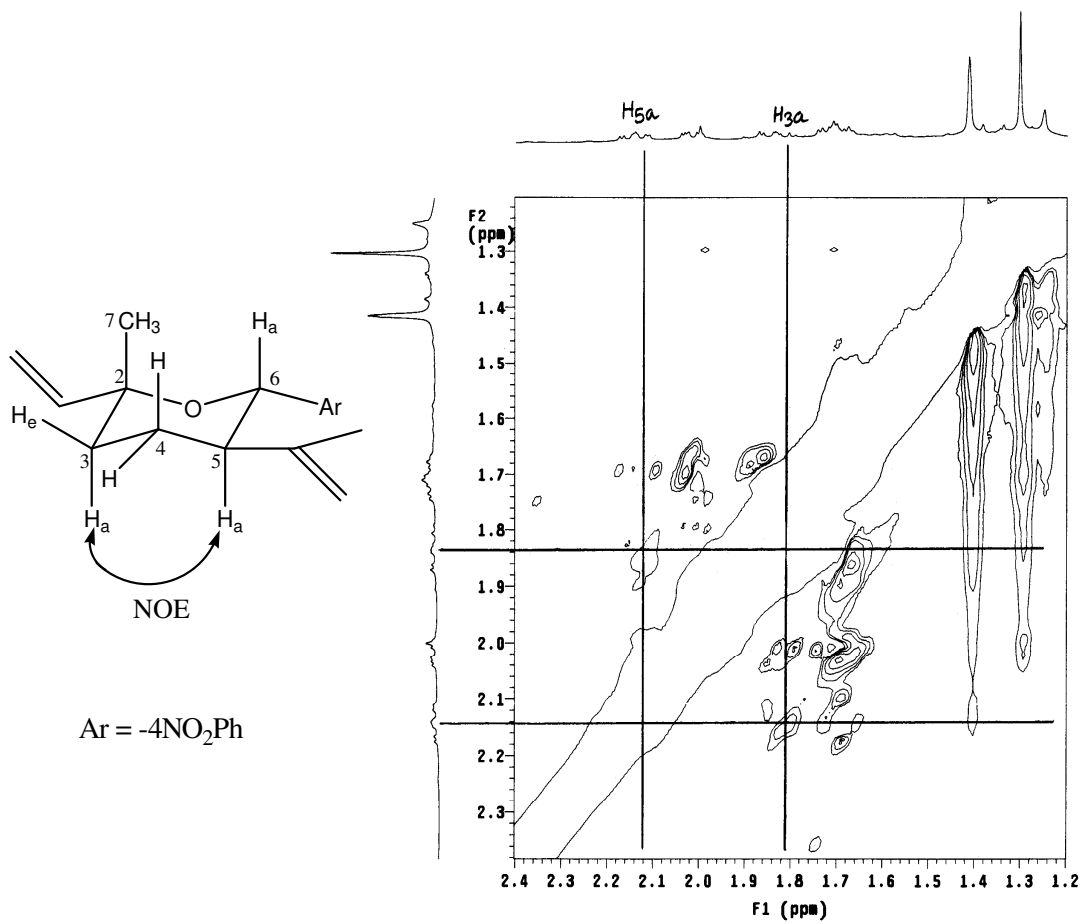

### NOESY spectra of 15

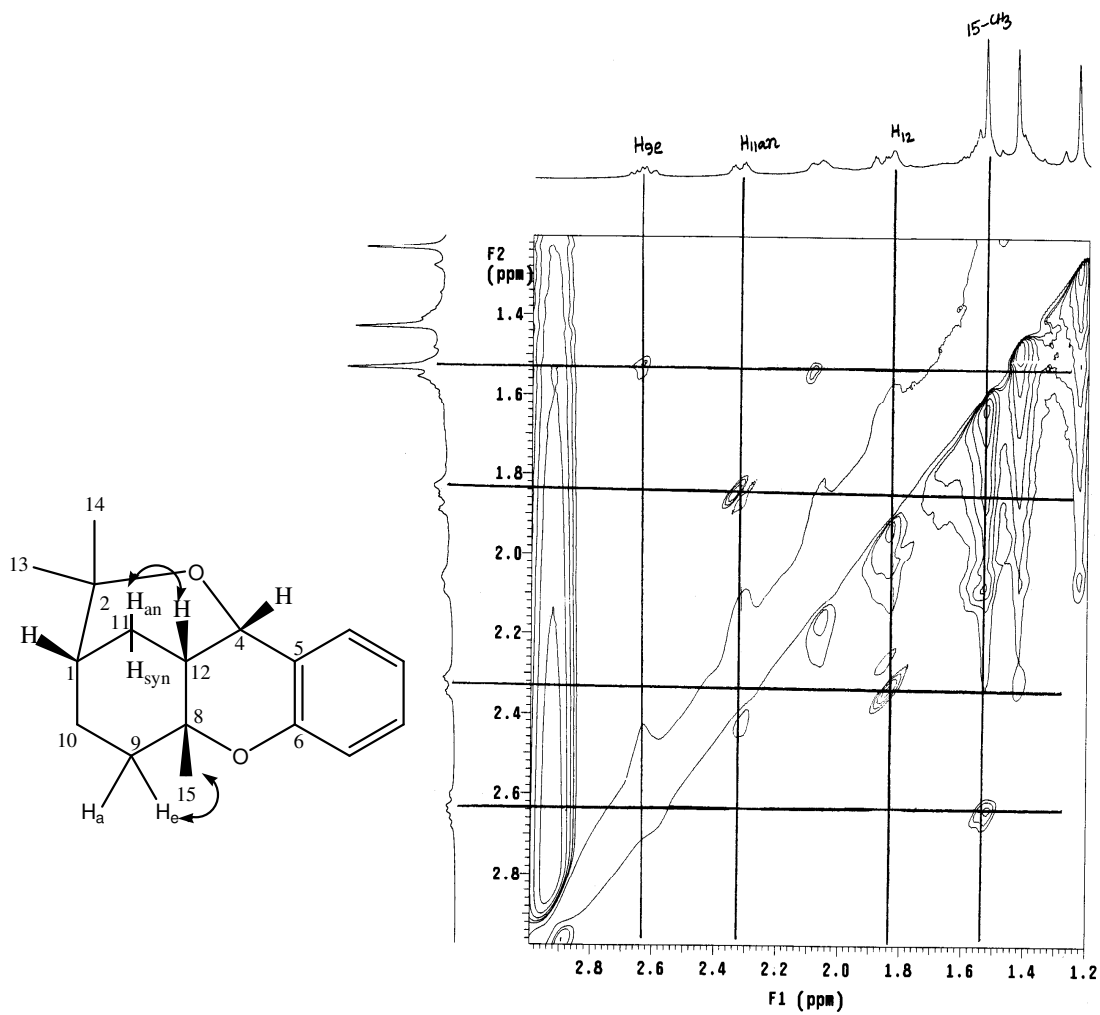

## NOESY spectra of 15

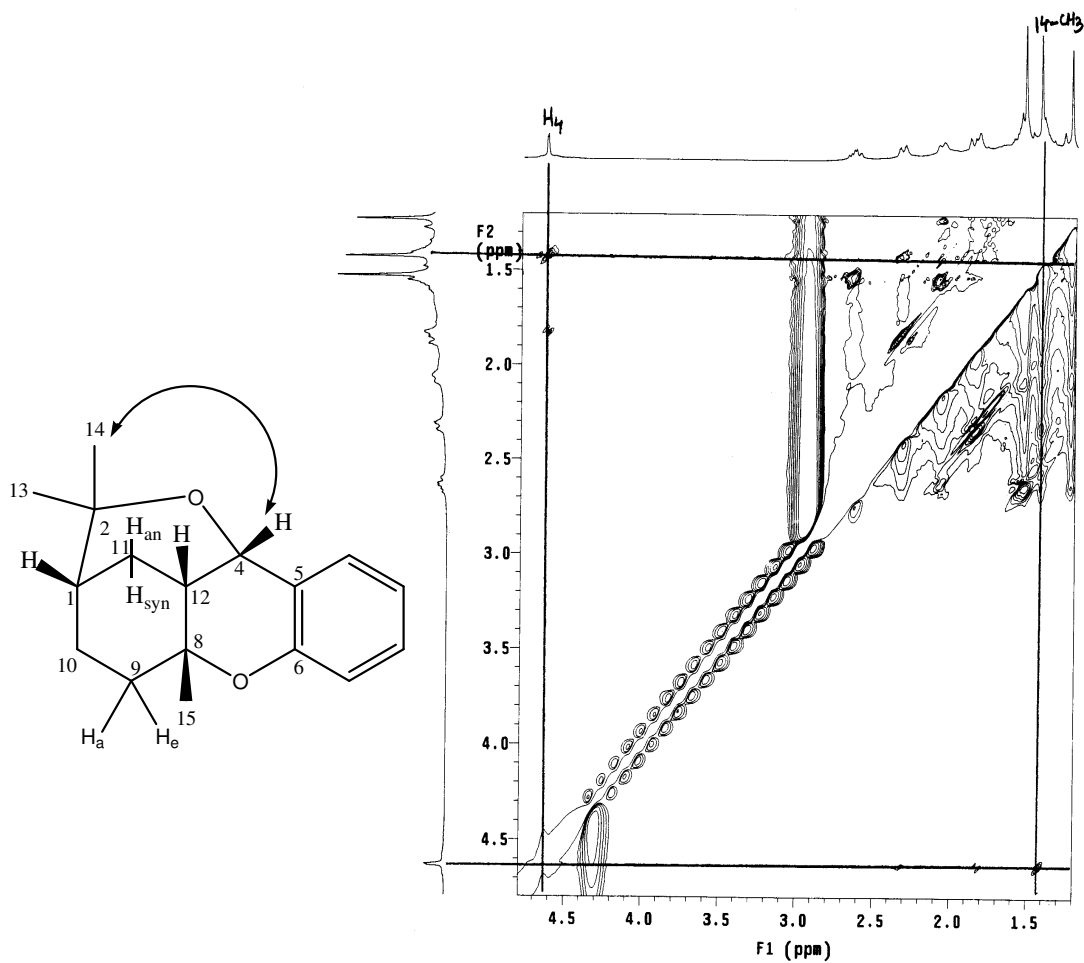



## COSY spectra of 15

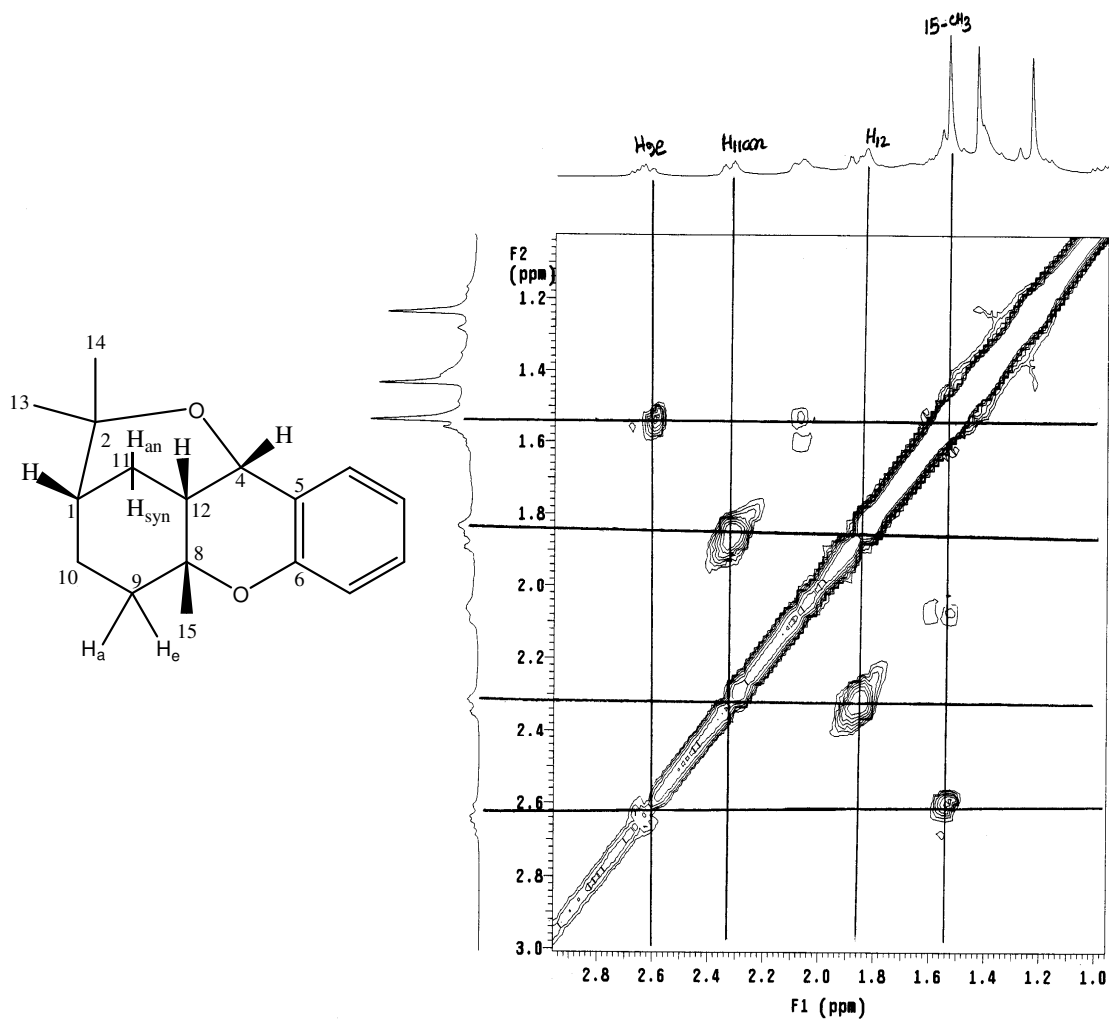

## COSY spectra of 15

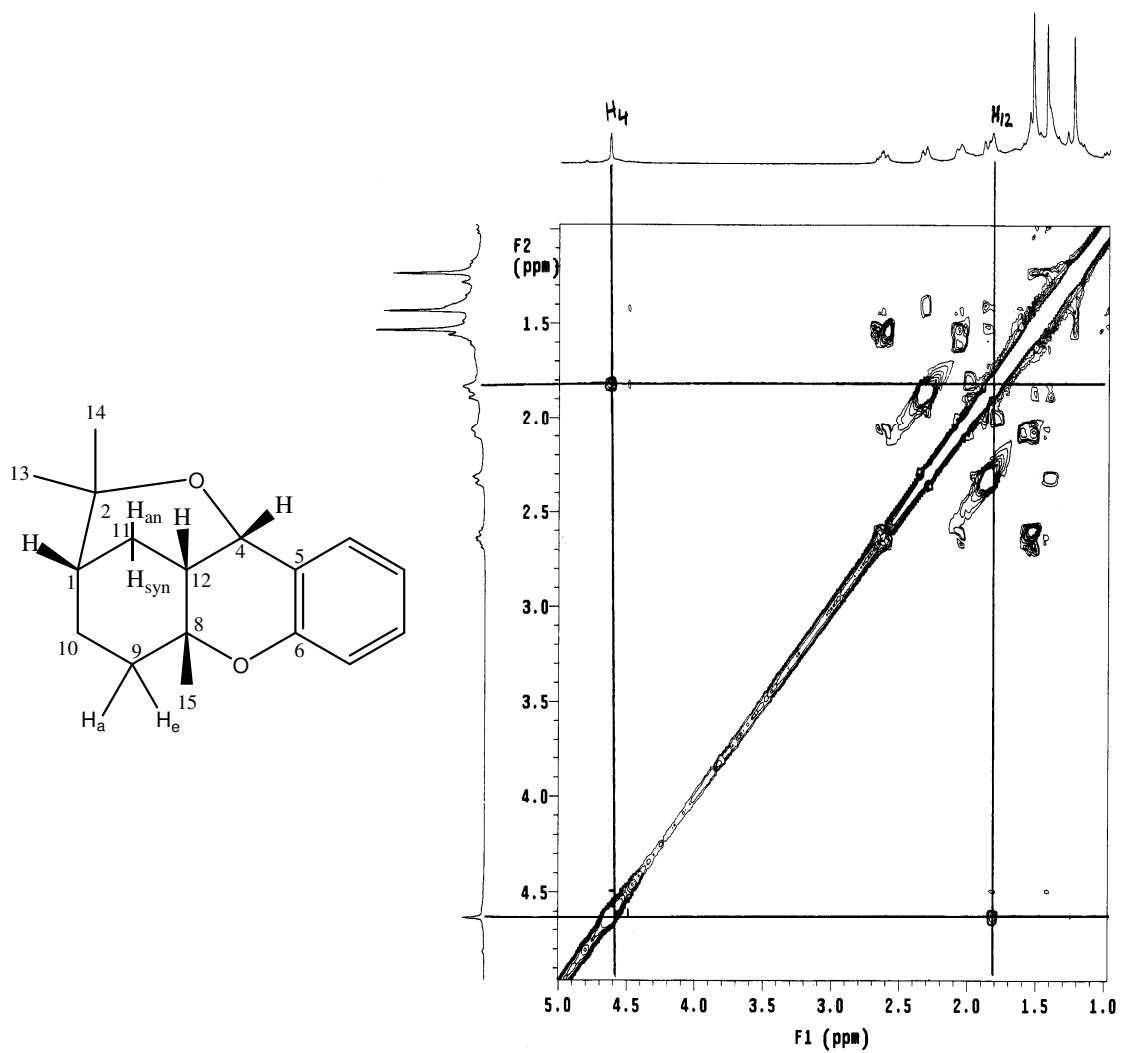

Supplement: c1ob05172e.pdf [file c1ob05172e.pdf]
