# Supplementary material for: La Mancha espera crecer un 5% en exportación
Source: Royal Society of Chemistry journal article supplement (doi:10.1039/c1ob05172e), 2011-01-01
Supplement: c1ob05172e_2.pdf [file c1ob05172e_2.pdf]

## HRMS spectra for Reference

### Synthesis of Oxabicyclo [3.3.1]nonenes and Substituted Tetrahydropyrans via (3,5)-Oxonium-Ene Reaction

Pipas Saha, Paramartha Gogoi and Anil K. Saikia\*

TOF MS  
PS\_286\_M 55 (1.135)

HAB273

06-Aug-2010  
1: TOF MS AP+  
5.47e4

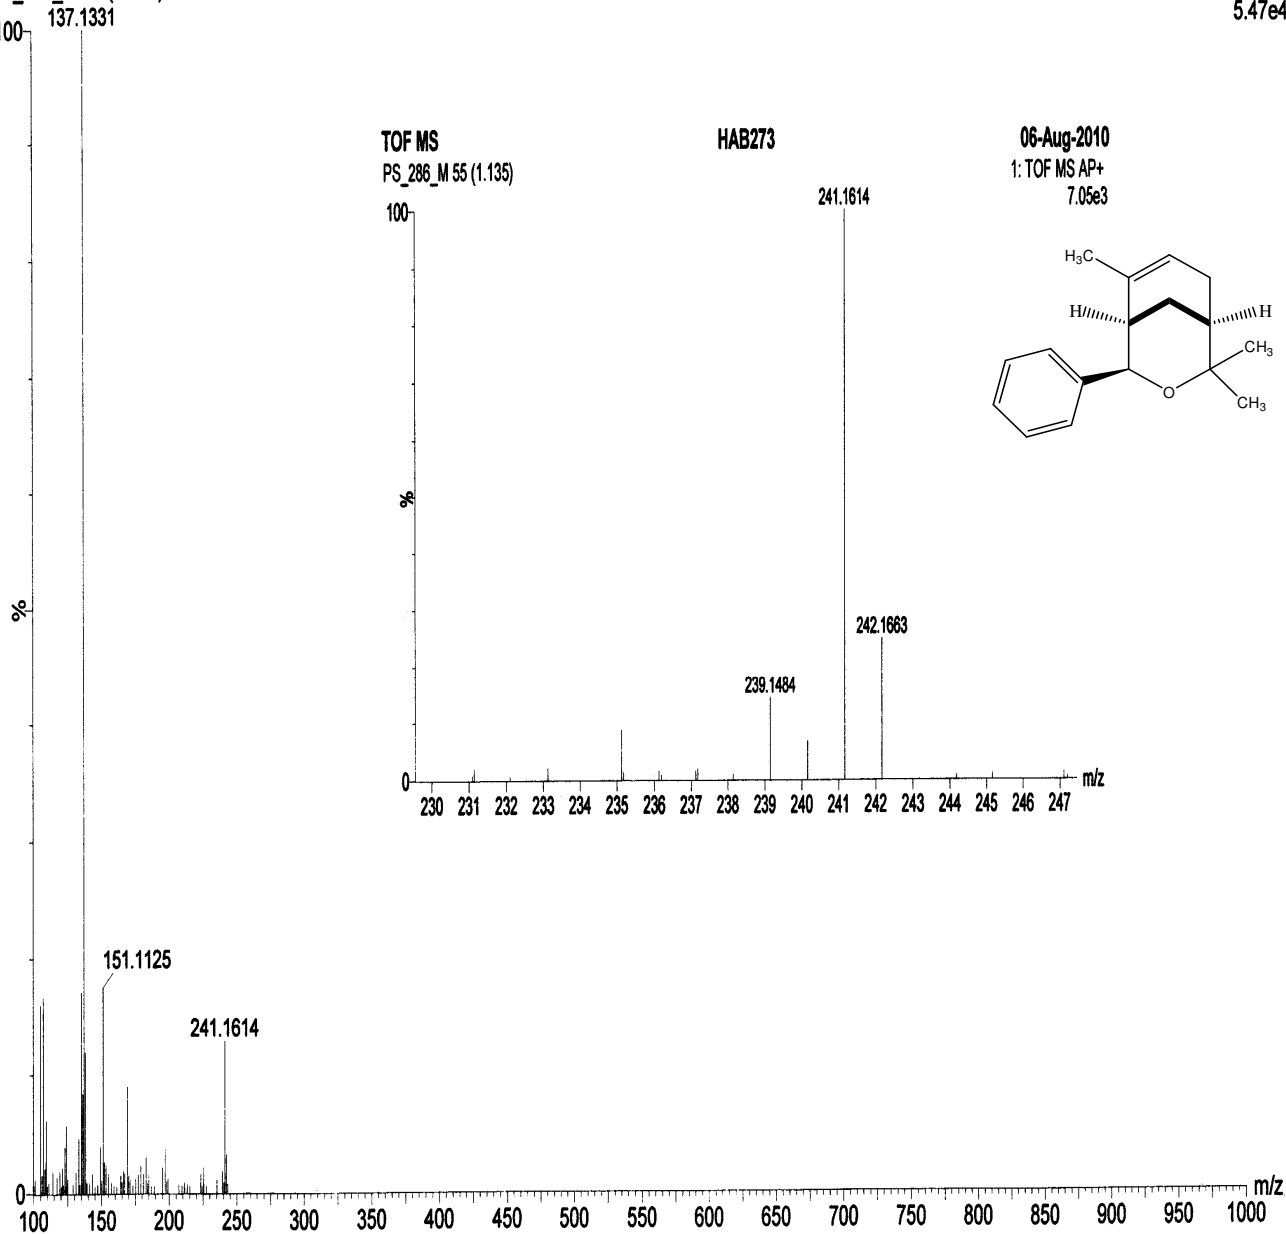

HRMS spectrum of 3a

TOF MS

PS\_169\_M1 30 (0.622)

100 137.1337

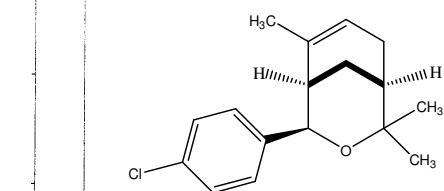

138.9964

%

151.1108

195.1252

275.1218

277.1205

0

100 150 200 250 300 350 400 450 500 550 600 650 700 750 800 850 900 950 1000 m/z

HAB273

TOF MS

PS\_169\_M1 30 (0.622)

100

%

273.2588

274

HAB273

275.1218

276.1269

277.1205

0

273

274

275

276

277

m/z

16-Aug-2010

1: TOF MS AP+

2.03e4

16-Aug-2010

1: TOF MS AP+

6.39e3

HRMS spectrum of 3b

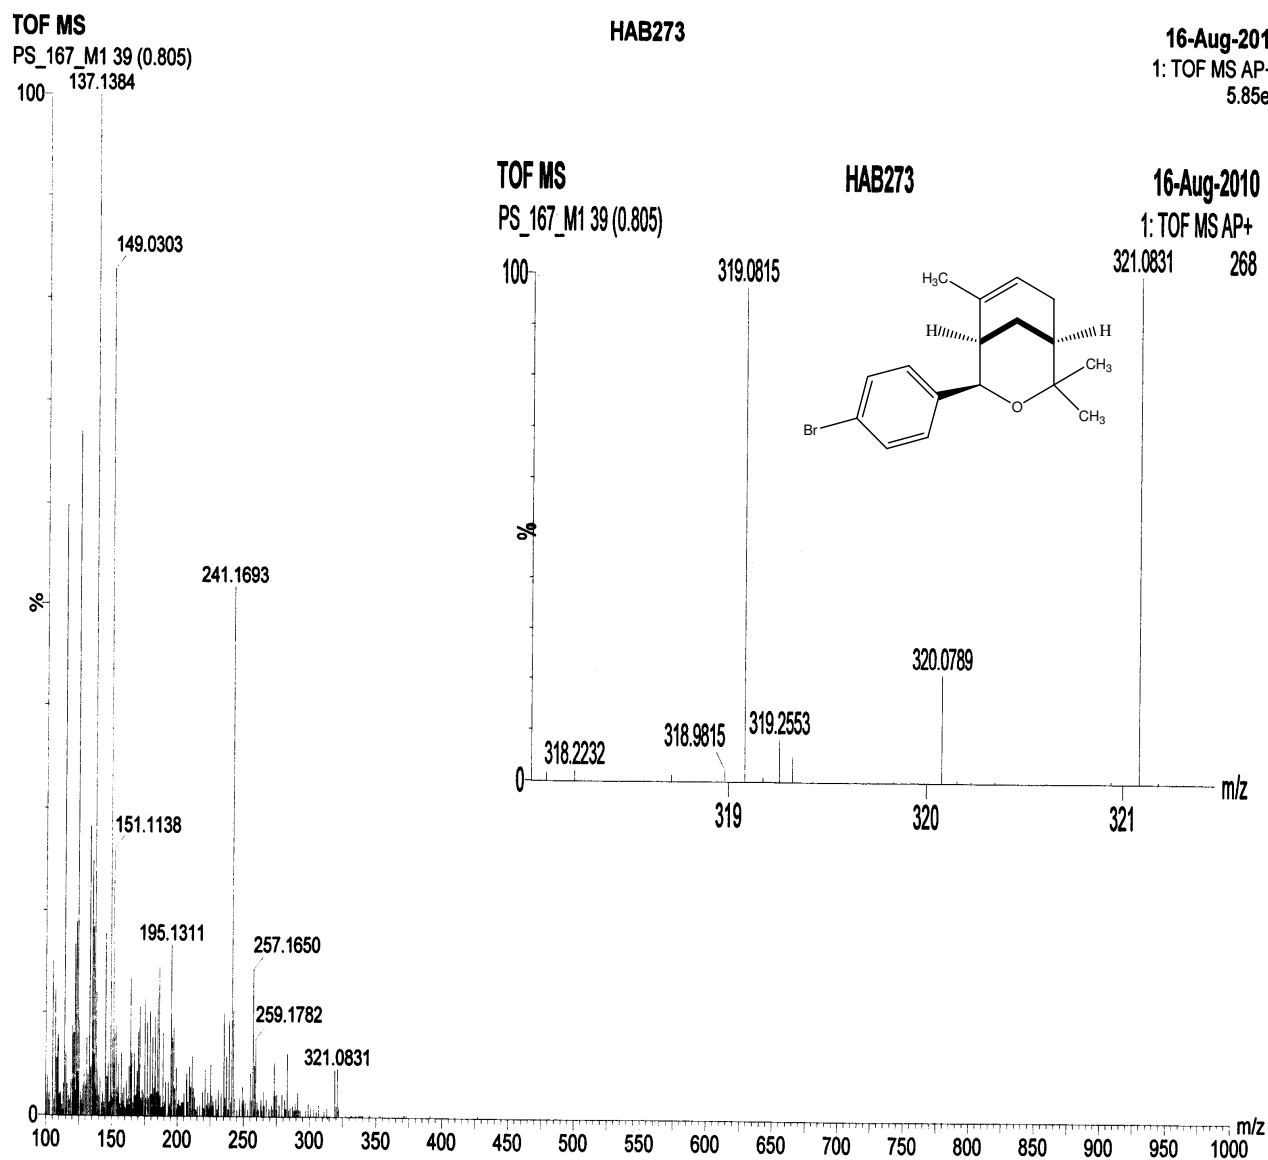

HRMS spectrum of 3c

TOF MS

PS\_170\_M1 68 (1.418)

137.1337

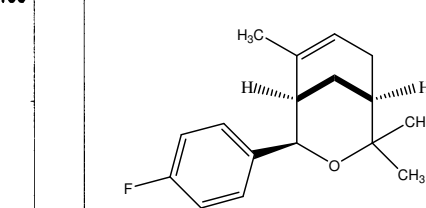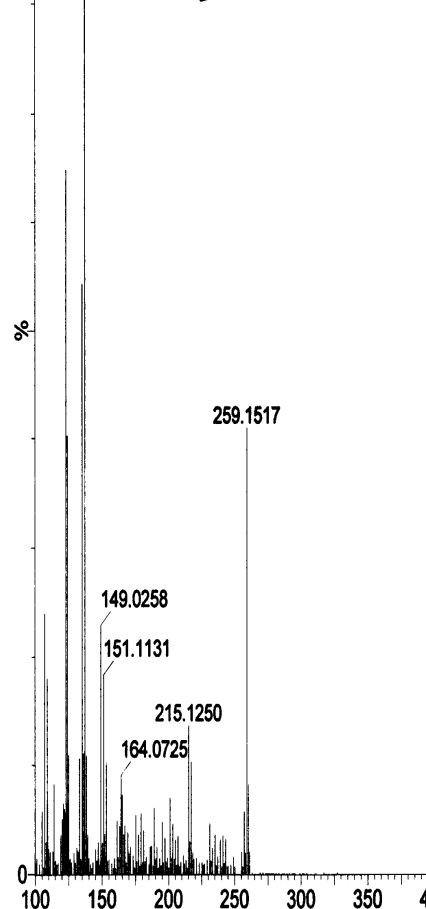

HAB273

09-Aug-2010

1: TOF MS AP+  
4.03e4

TOF MS

PS\_170\_M1 68 (1.418)

100

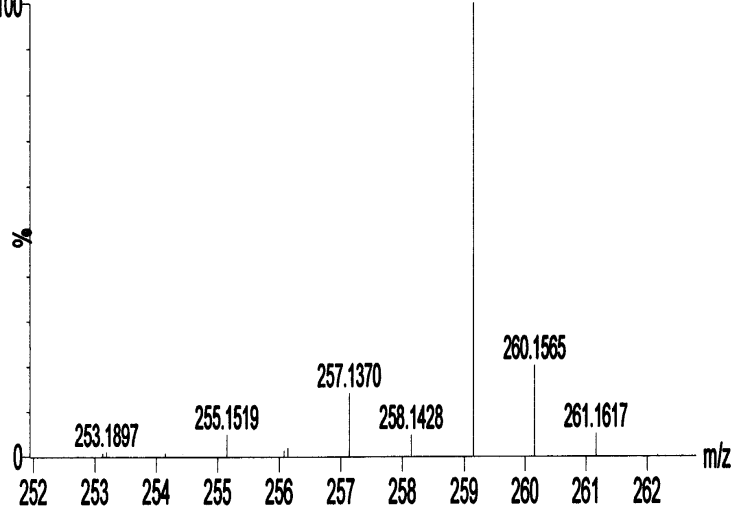

HAB273

09-Aug-2010

1: TOF MS AP+  
1.65e4

HRMS spectrum of 3d

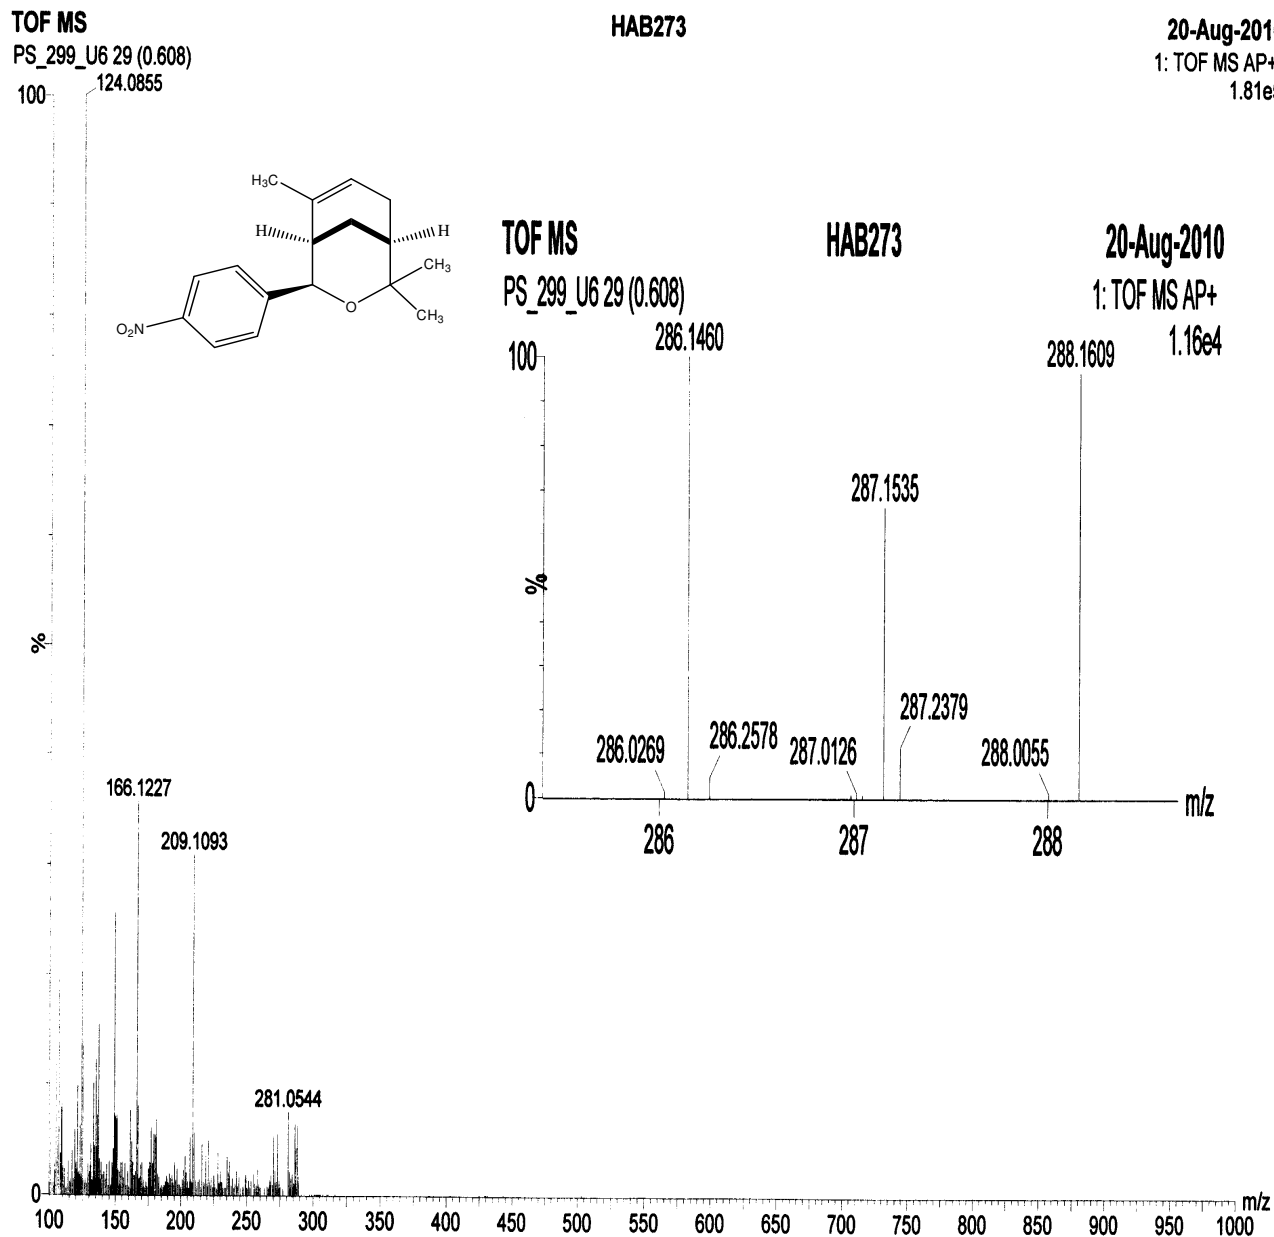

TOF MS

PS\_175\_M 49 (1.032)

137.1347

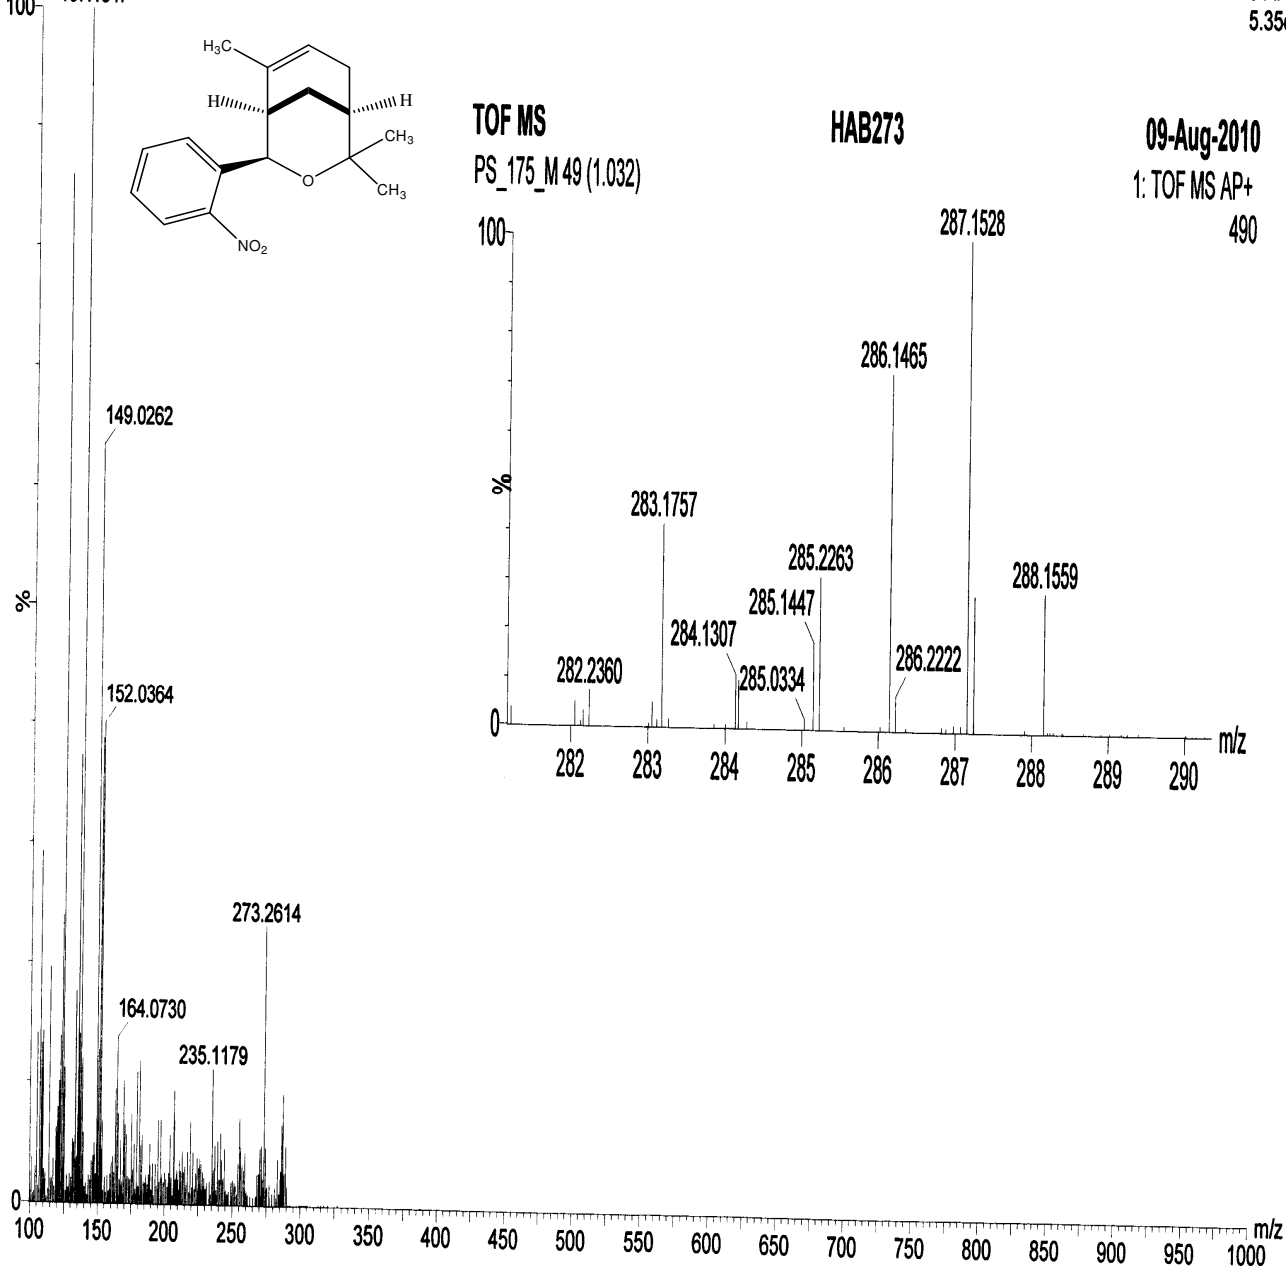

HAB273

09-Aug-2010

1: TOF MS AP+

5.35e3

TOF MS

PS\_175\_M 49 (1.032)

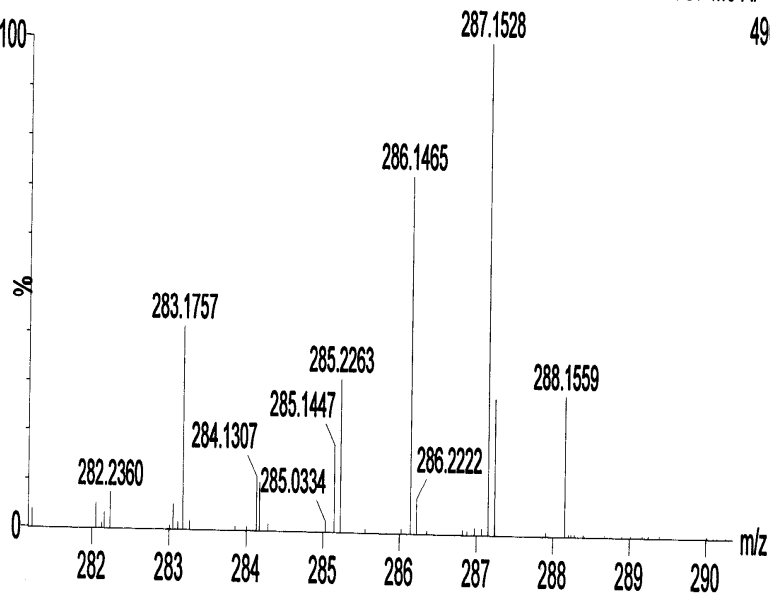

HAB273

09-Aug-2010

1: TOF MS AP+

490

HRMS spectrum of 3f

TOF MS

PS\_163\_M 95 (1.958)

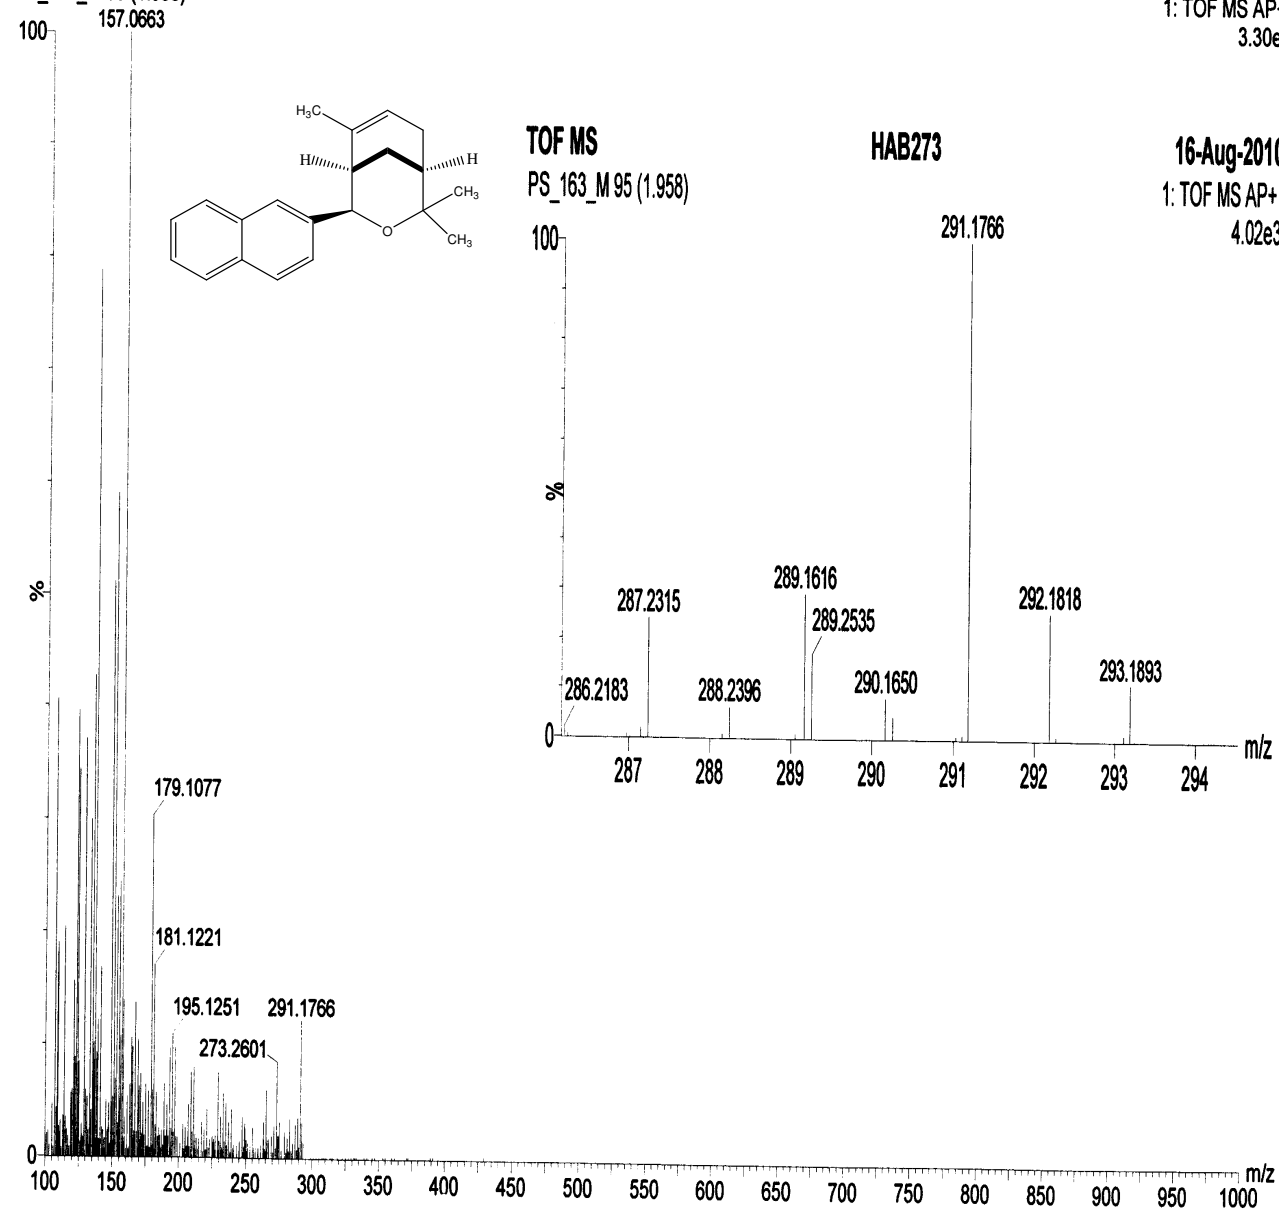

HAB273

16-Aug-2010

1: TOF MS AP+  
3.30e4

TOF MS

PS\_163\_M 95 (1.958)

HAB273

16-Aug-2010

1: TOF MS AP+  
4.02e3

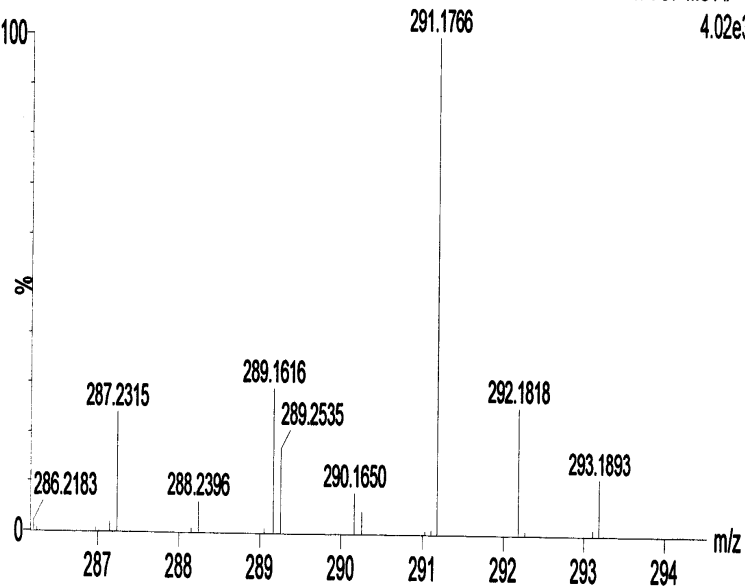

HRMS spectrum of 3g



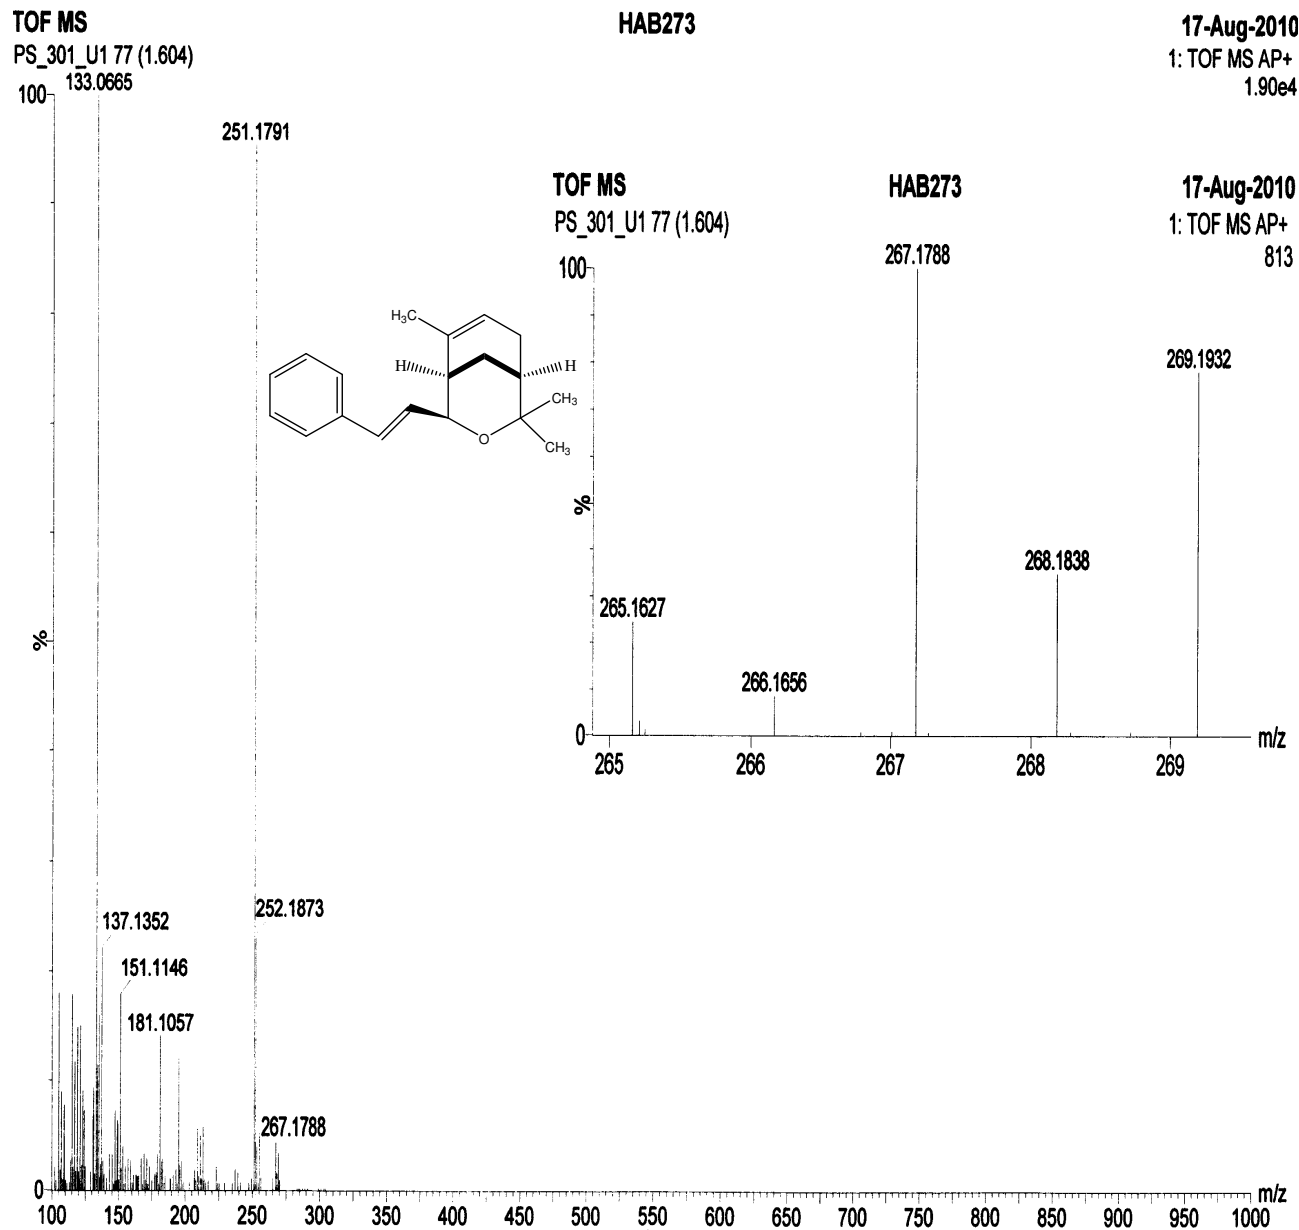

**HRMS spectrum of 3h**

**TOF MS**

PS\_297\_M 17 (0.366)

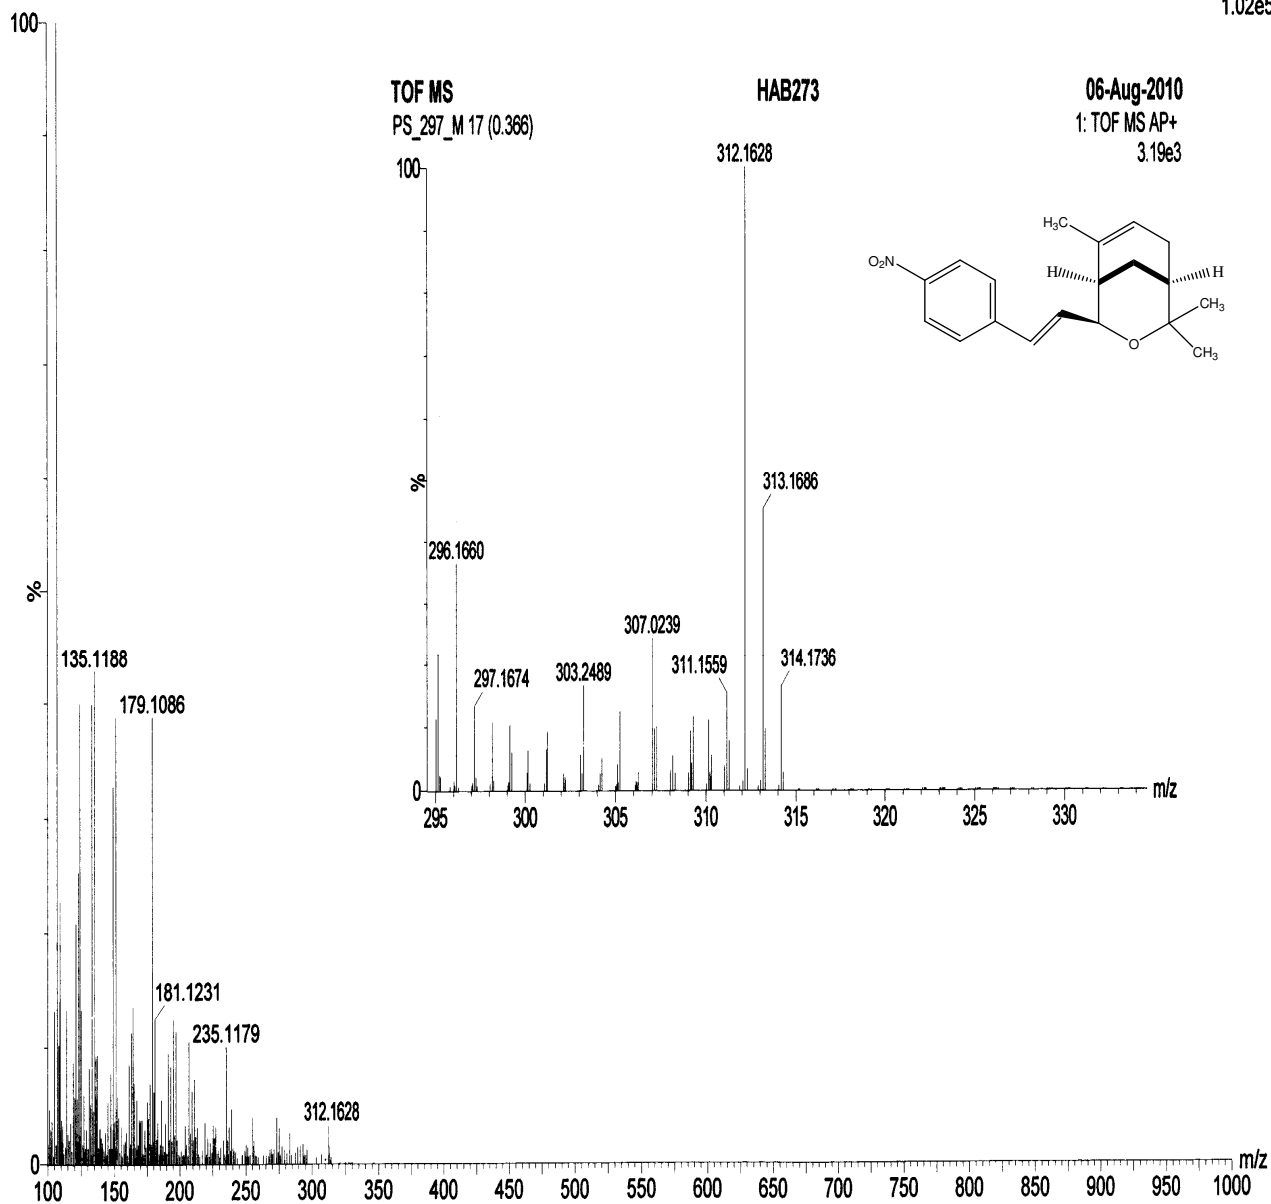

**HAB273**

06-Aug-2010

1: TOF MS AP+  
1.02e5

**TOF MS**

PS\_297\_M 17 (0.366)

**HAB273**

06-Aug-2010

1: TOF MS AP+  
3.19e3

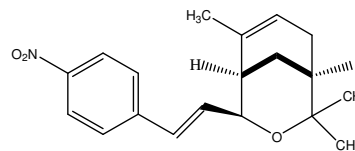

**HRMS spectrum of 3i**

TOF MS

PS\_172\_M5 7 (0.147)

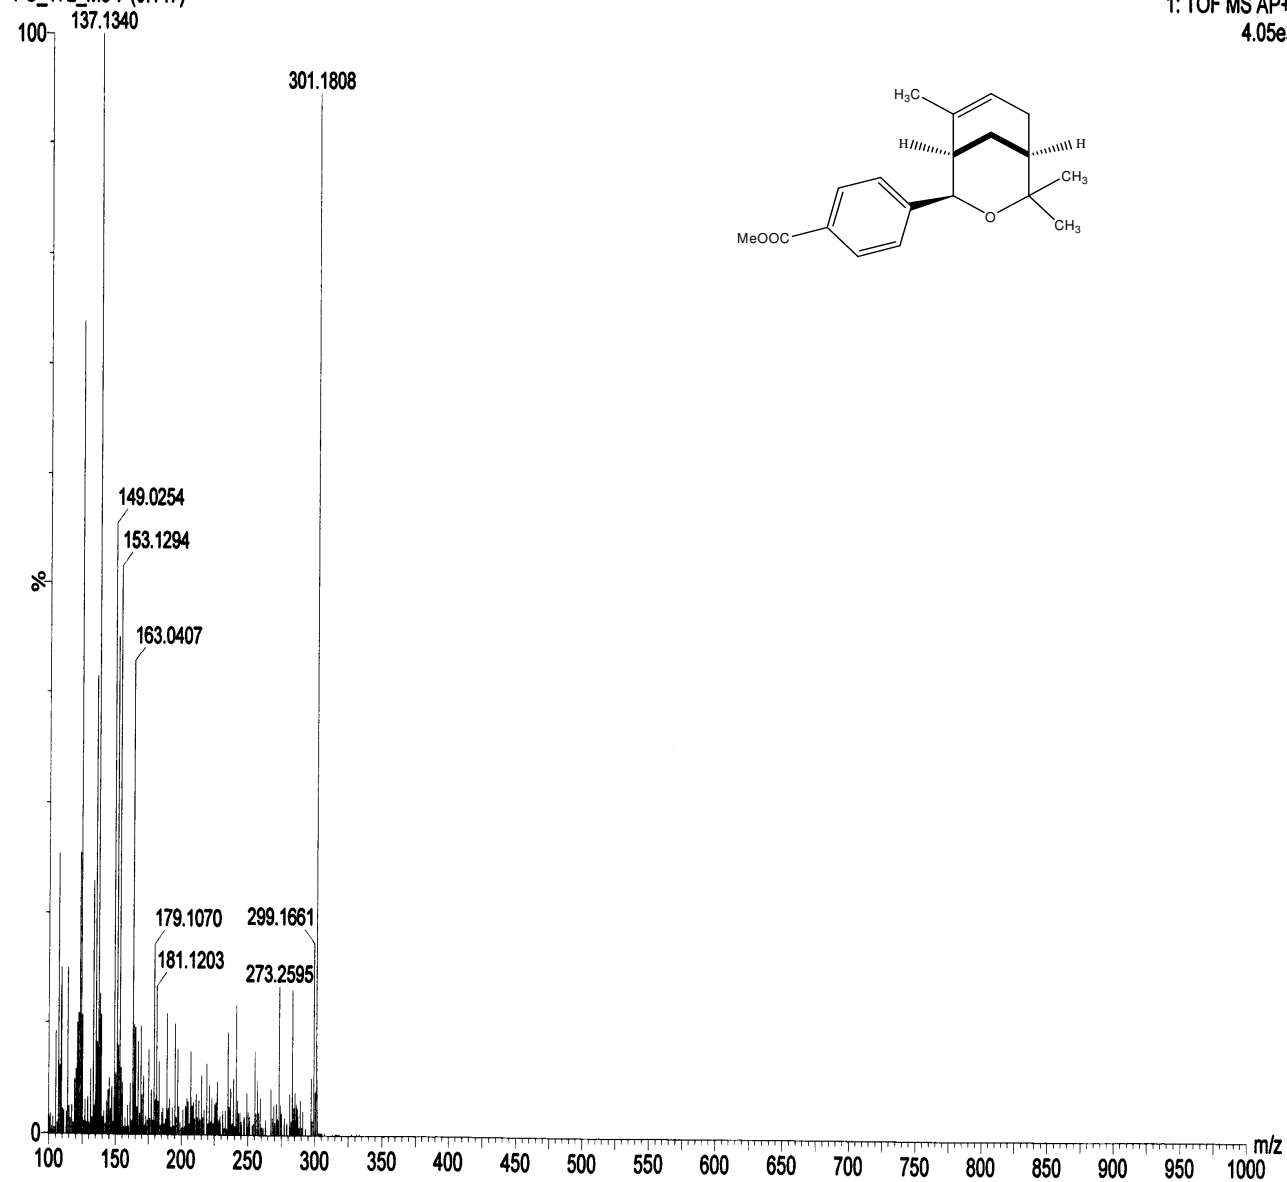

HAB273

09-Aug-2010

1: TOF MS AP+  
4.05e3

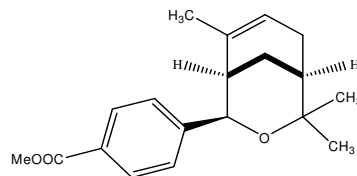

HRMS spectrum of 3j

TOF MS

PS\_313\_L1 21 (0.443)

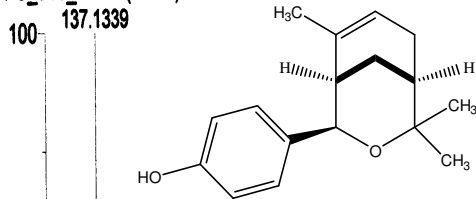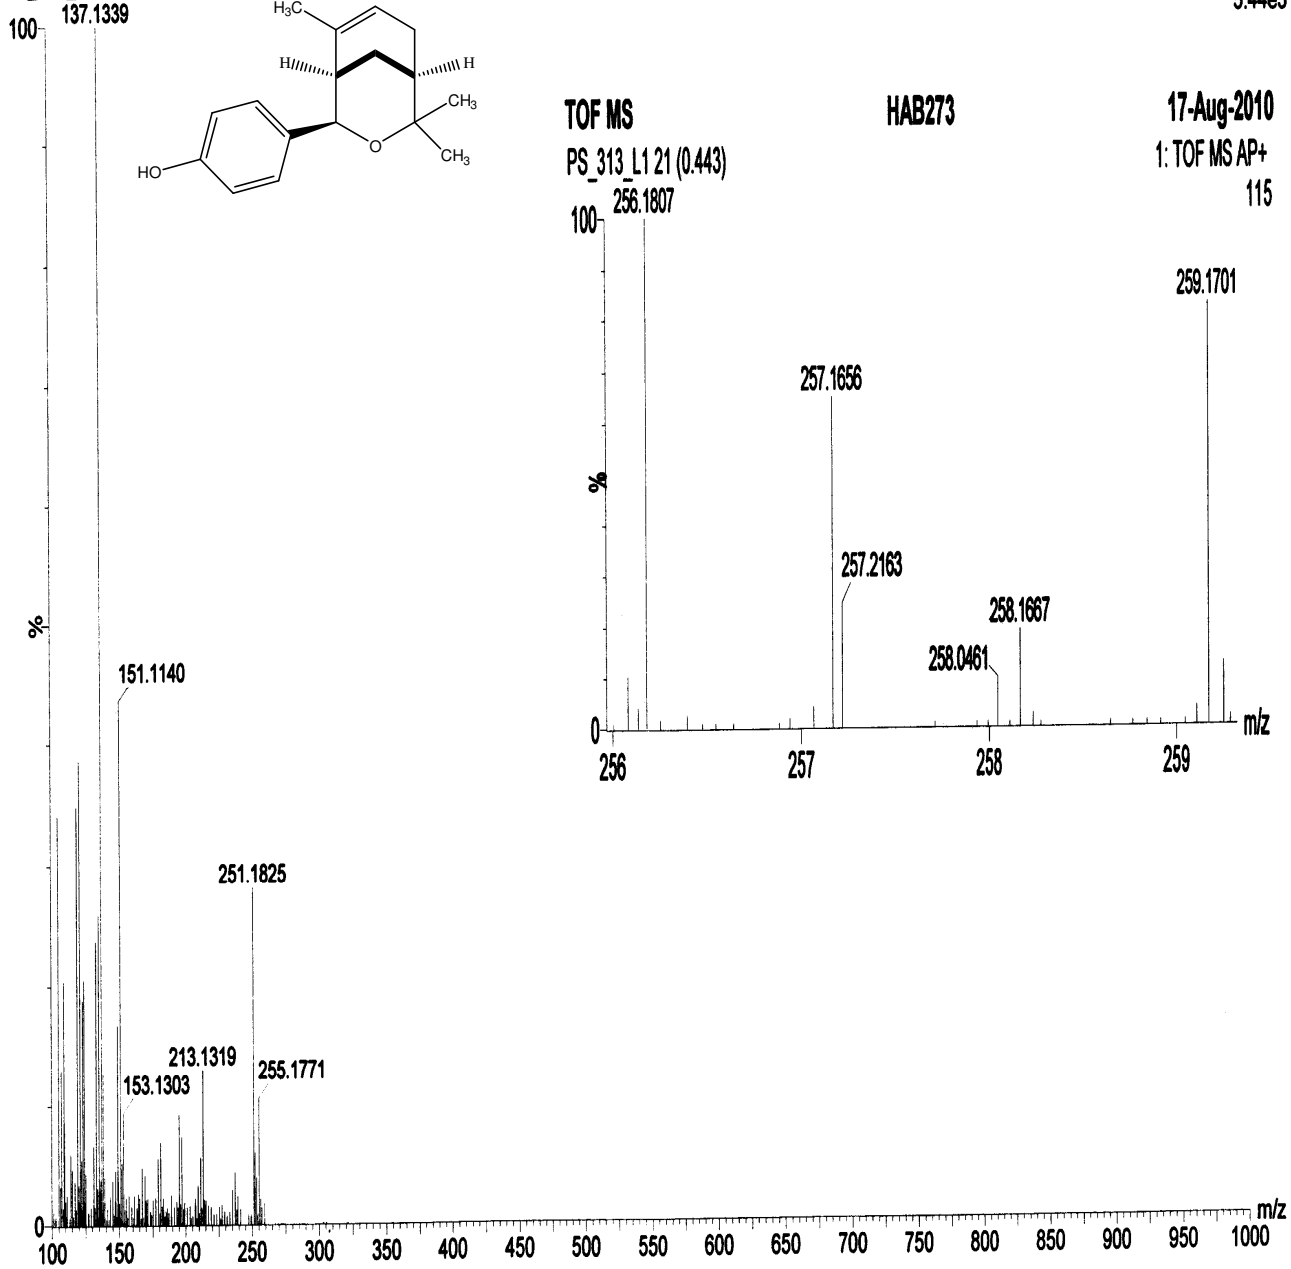

HAB273

17-Aug-2010

1: TOF MS AP+  
5.44e3

TOF MS

PS\_313\_L1 21 (0.443)

HAB273

17-Aug-2010

1: TOF MS AP+  
115

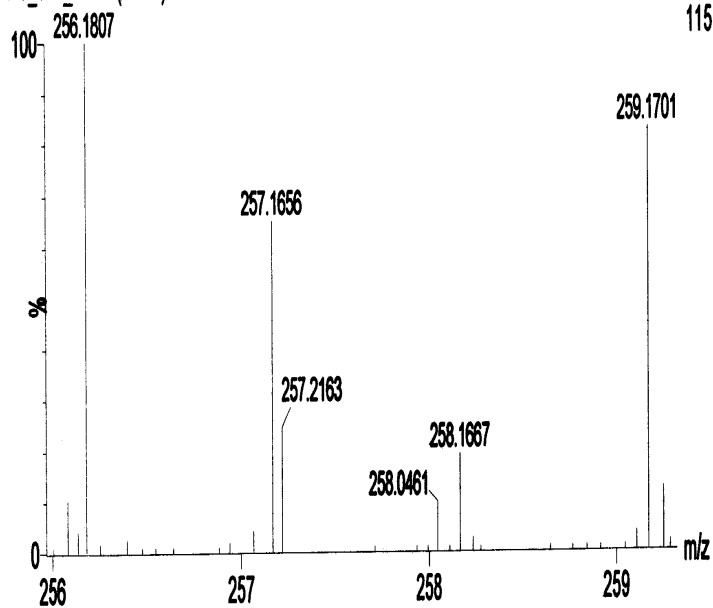

HRMS spectrum of 3k

**TOF MS**

PS\_209M1\_1 63 (1.311)

100 137.1346

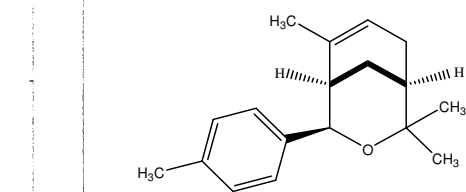

%

151.1144 255.1783

153.1303

213.1313

0 100 150 200 250 300 350 400 450 500 550 600 650 700 750 800 850 900 950 1000 m/z

**HRMS spectrum of 31**

**HAB273**

**TOF MS**

PS\_209M1\_1 63 (1.311)

100

**HAB273**

255.1783

%

253.1616

256.1827

257.1914

0 250 251 252 253 254 255 256 257 258 259 260 m/z

17-Aug-2010

1: TOF MS AP+

3.60e4

17-Aug-2010

1: TOF MS AP+

9.69e3

TOF MS

PS\_293\_M2 11 (0.238)

137.1317

100

%

138.1373

151.1037

249.2224

0

100 150 200 250 300 350 400 450 500 550 600 650 700 750 800 850 900 950 1000

m/z

HRMS spectrum of 3m

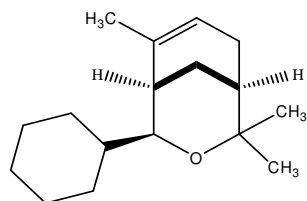

HAB273

16-Aug-2010

1: TOF MS AP+

8.87e4

TOF MS

PS\_293\_M2 11 (0.238)

100

%

0

247.2078

248.2144

249.2224

245 246 247 248 249 250 251 252 253 254 255 256 257

m/z

HAB273

16-Aug-2010

1: TOF MS AP+

3.92e3

**TOF MS**

PS\_196\_M1 37 (0.775)

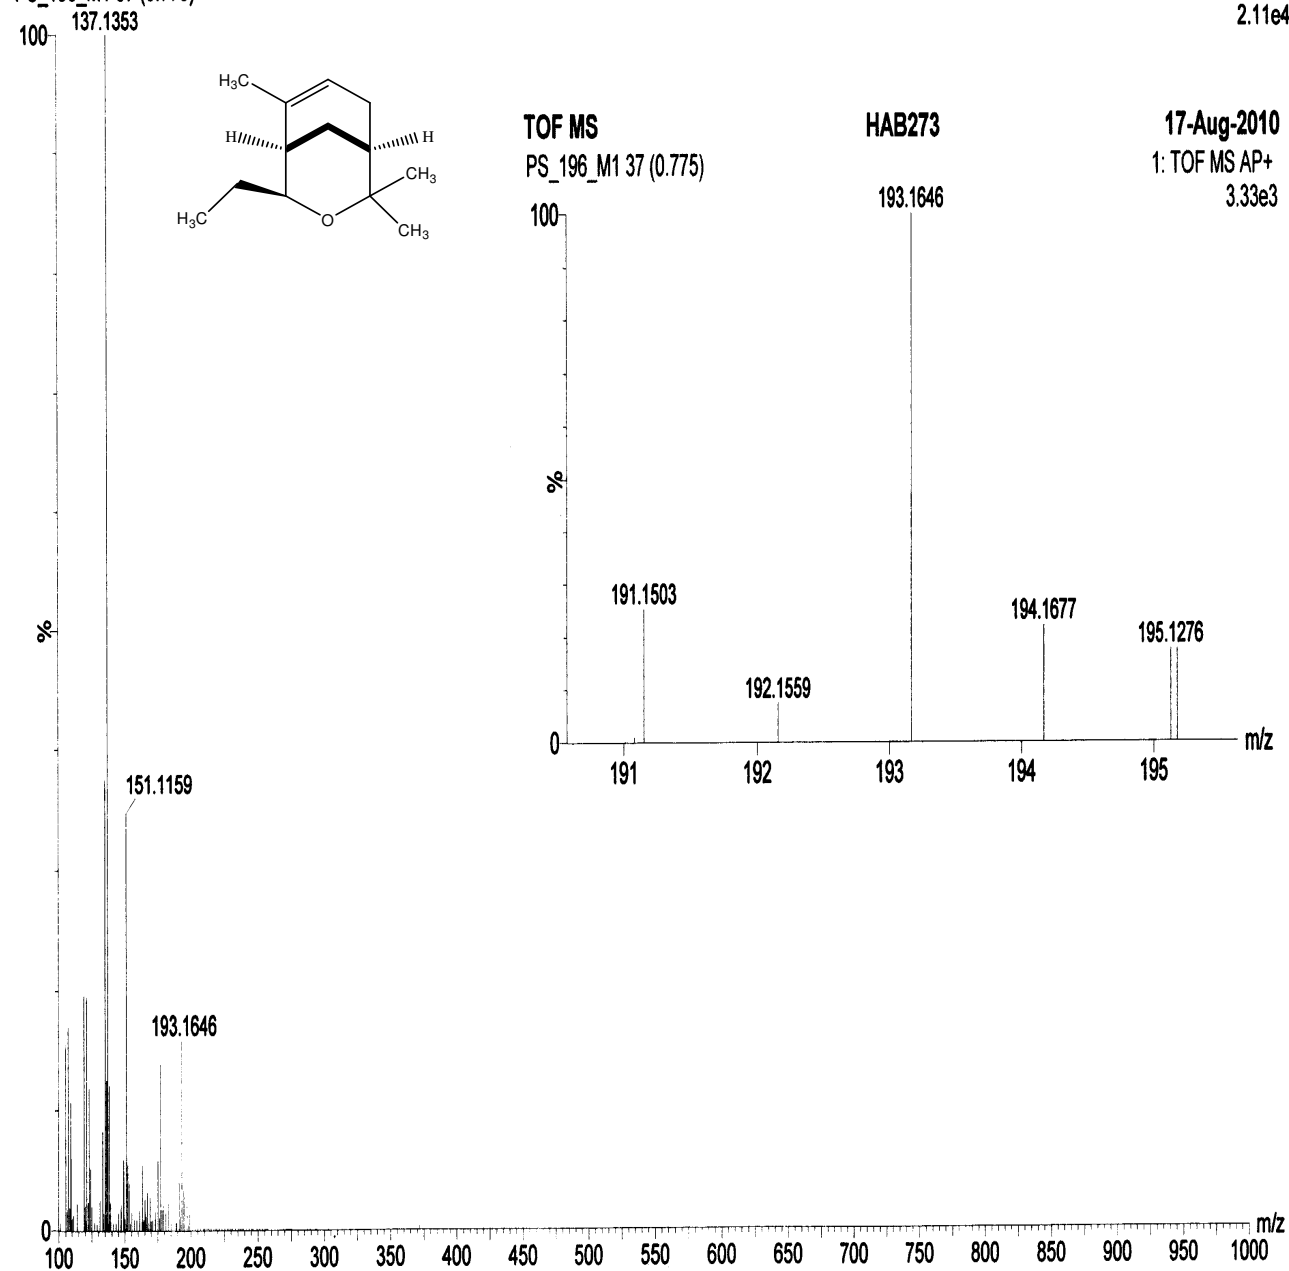

**HAB273**

17-Aug-2010

1: TOF MS AP+  
2.11e4

**TOF MS**

PS\_196\_M1 37 (0.775)

**HAB273**

17-Aug-2010

1: TOF MS AP+  
3.33e3

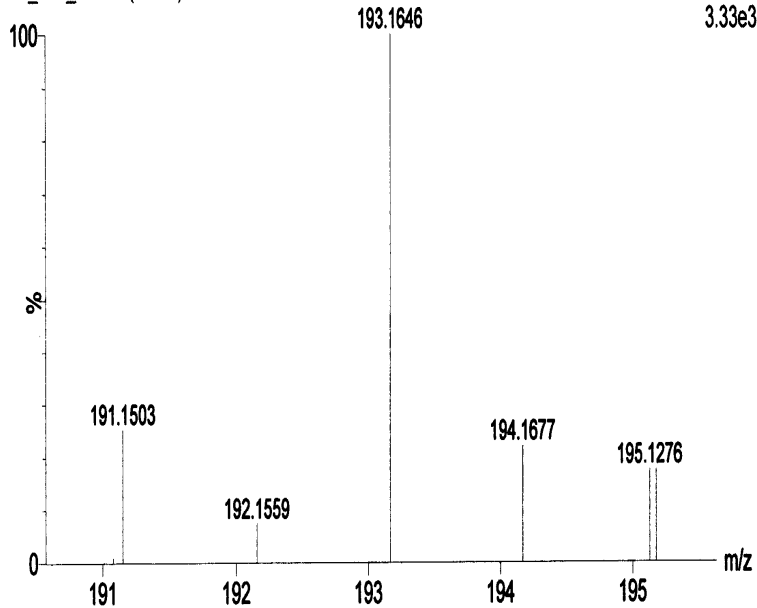

**HRMS spectrum of 3n**

TOF MS

PS\_291\_M1 58 (1.208)

137.1333

100

%

0

138.1380

151.1138

207.1775

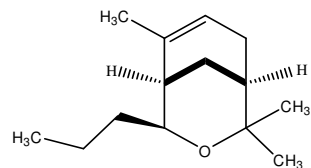

HAB273

18-Aug-2010

1: TOF MS AP+

5.10e4

TOF MS

PS\_291\_M1 58 (1.208)

100

%

0

205.1626

207.0873

207.1775

208.1824

209.1921

m/z

205

206

207

208

209

HAB273

18-Aug-2010

1: TOF MS AP+

2.61e3

HRMS spectrum of 30



TOF MS

PS\_216\_M 34 (0.714)

137.1335

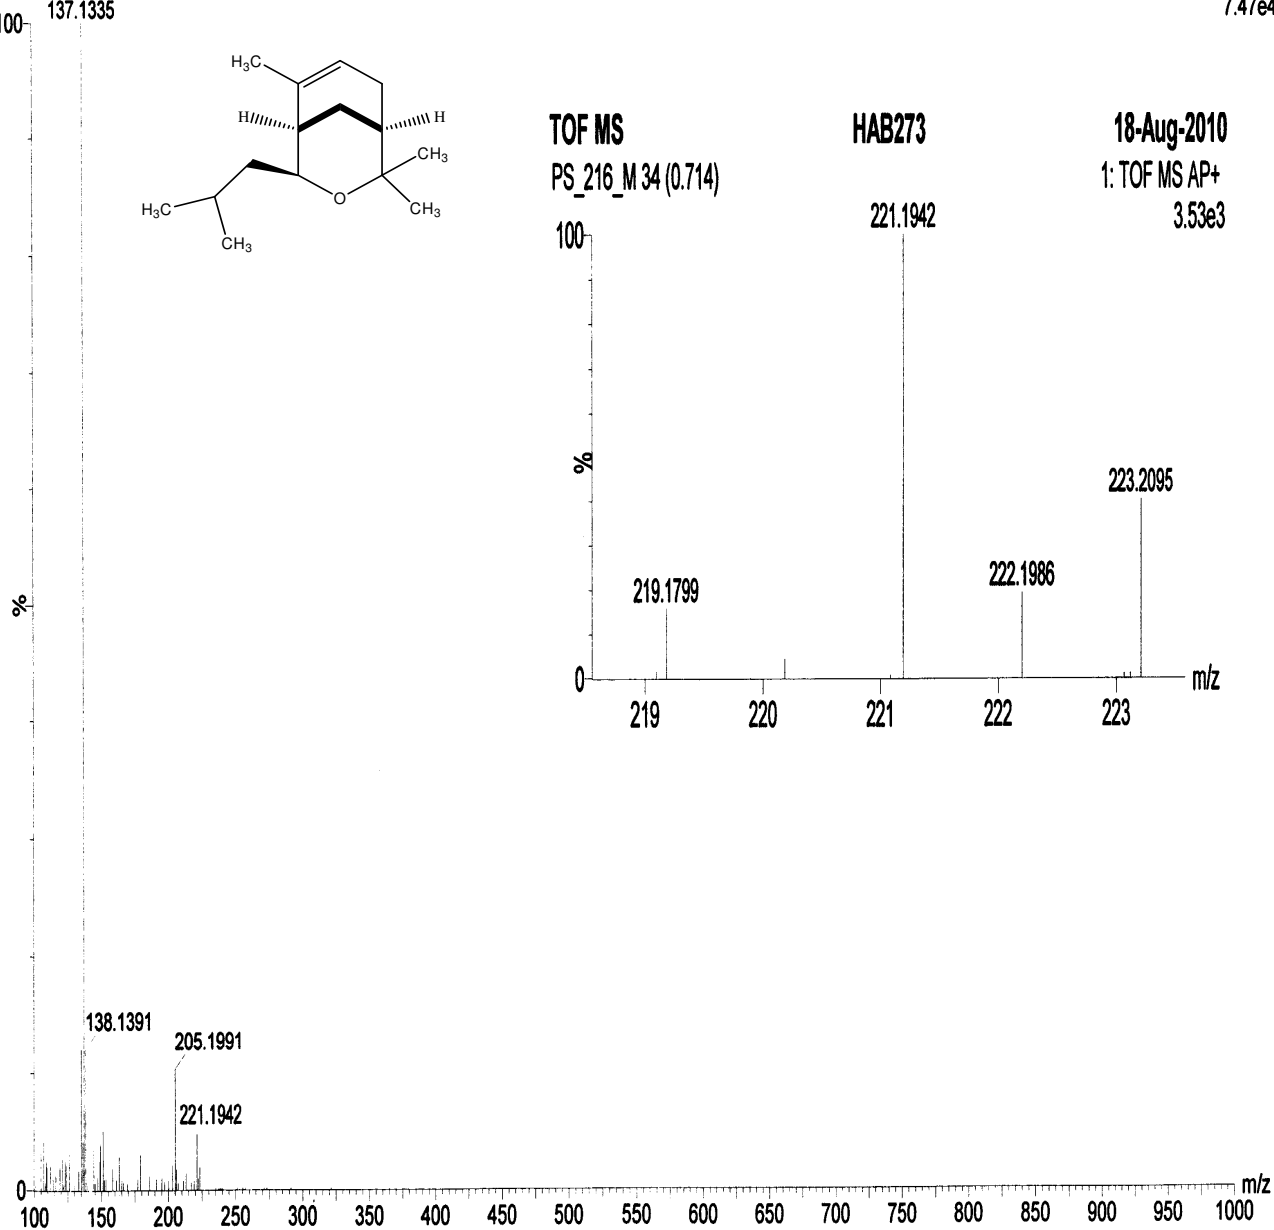

HAB273

18-Aug-2010

1: TOF MS AP+

7.47e4

TOF MS

PS\_216\_M 34 (0.714)

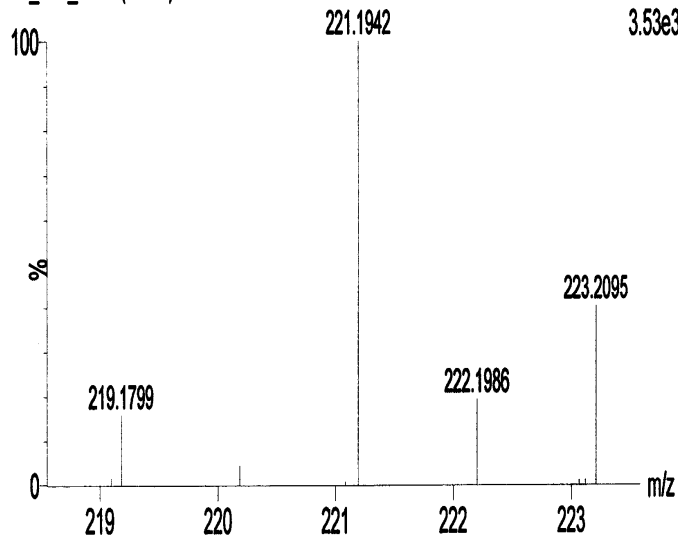

HAB273

18-Aug-2010

1: TOF MS AP+

3.53e3

HRMS spectrum of 3p

**TOF MS**

PS\_302\_M2 56 (1.162)

**HAB273**

**20-Aug-2010**

1: TOF MS AP+  
1.37e5

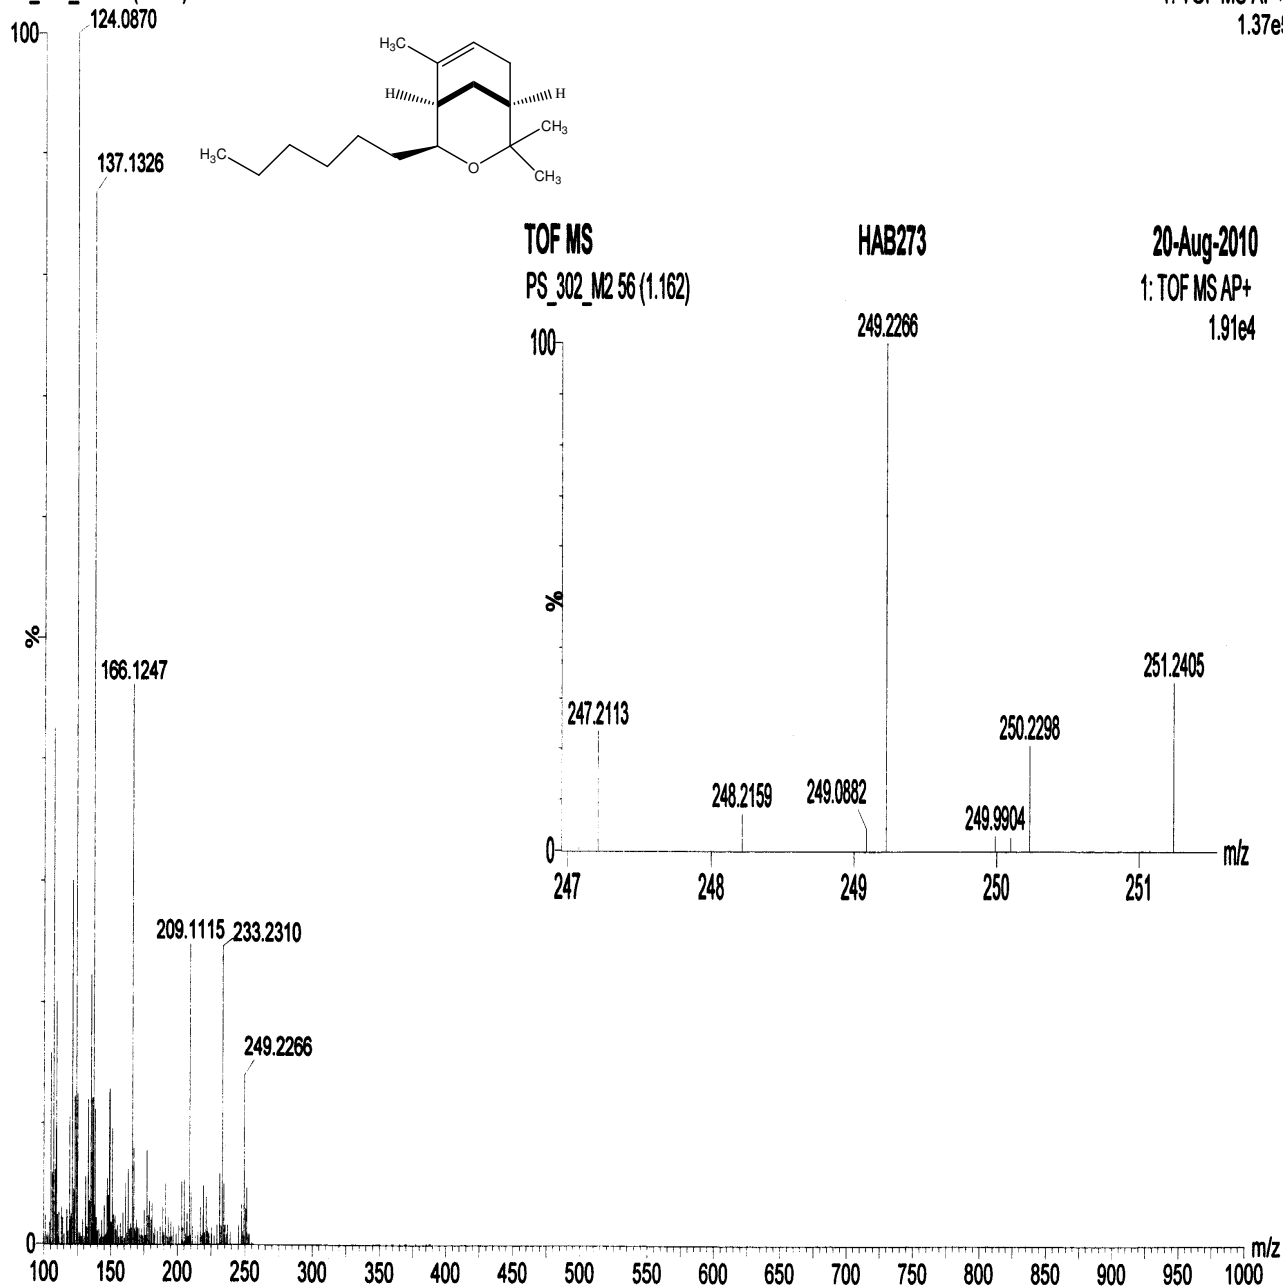

**HRMS spectrum of 3q**

TOF MS

PS\_304\_M1 59 (1.236)

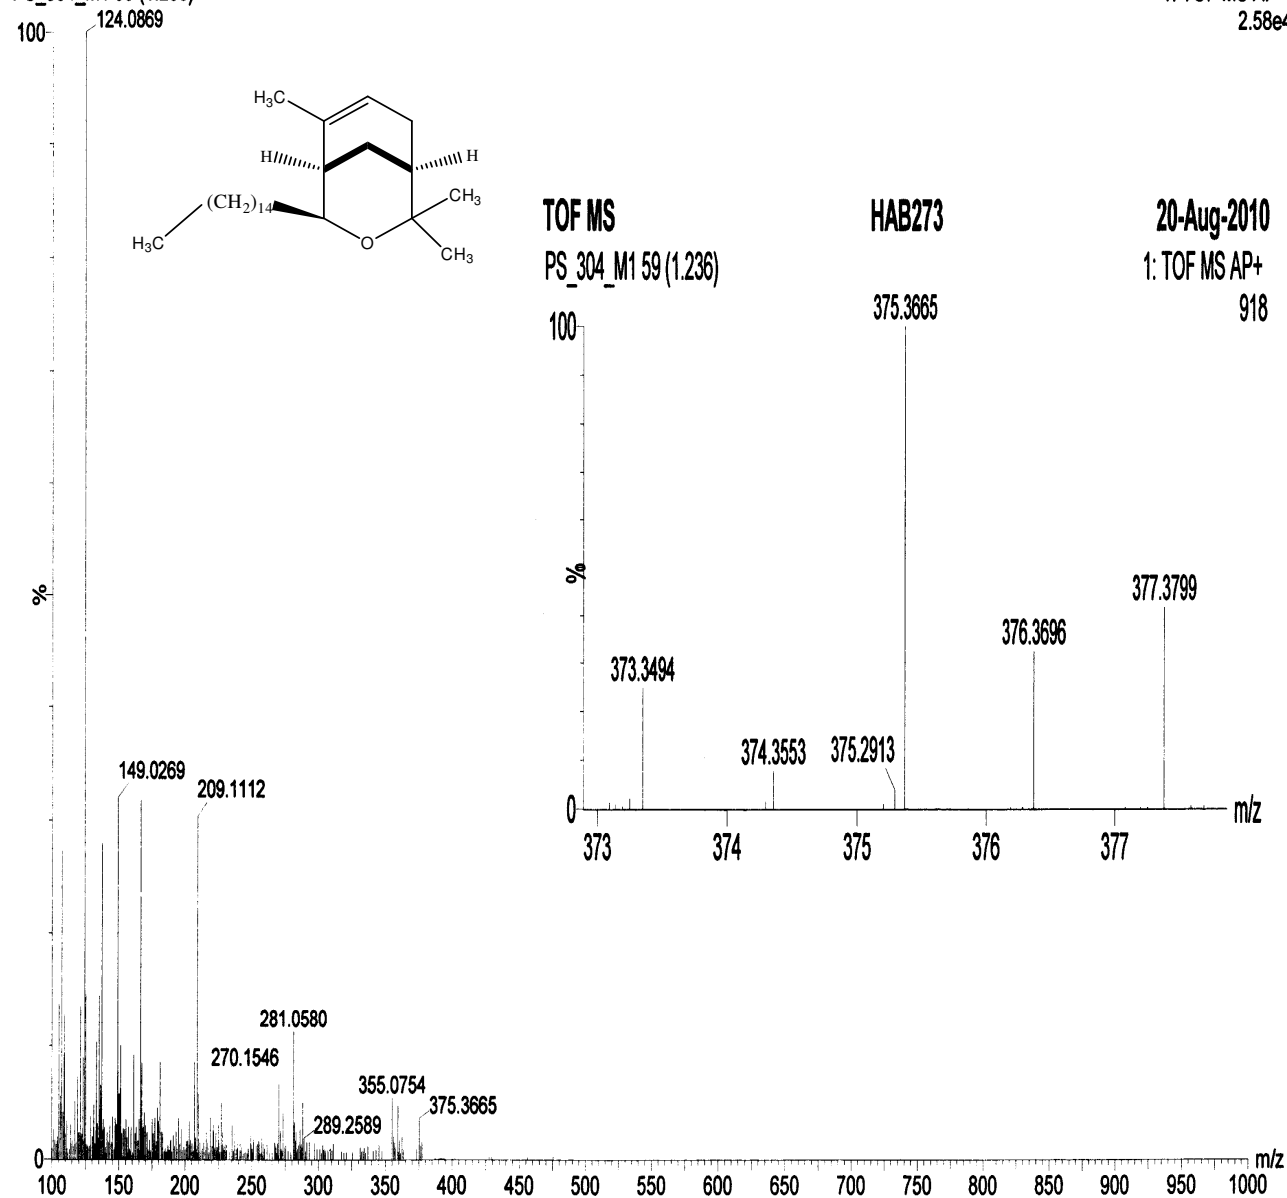

HAB273

20-Aug-2010

1: TOF MS AP+  
2.58e4

TOF MS

PS\_304\_M1 59 (1.236)

HAB273

20-Aug-2010

1: TOF MS AP+  
918

HRMS spectrum of 3r

TOF MS

PS\_286\_U1 54 (1.116)

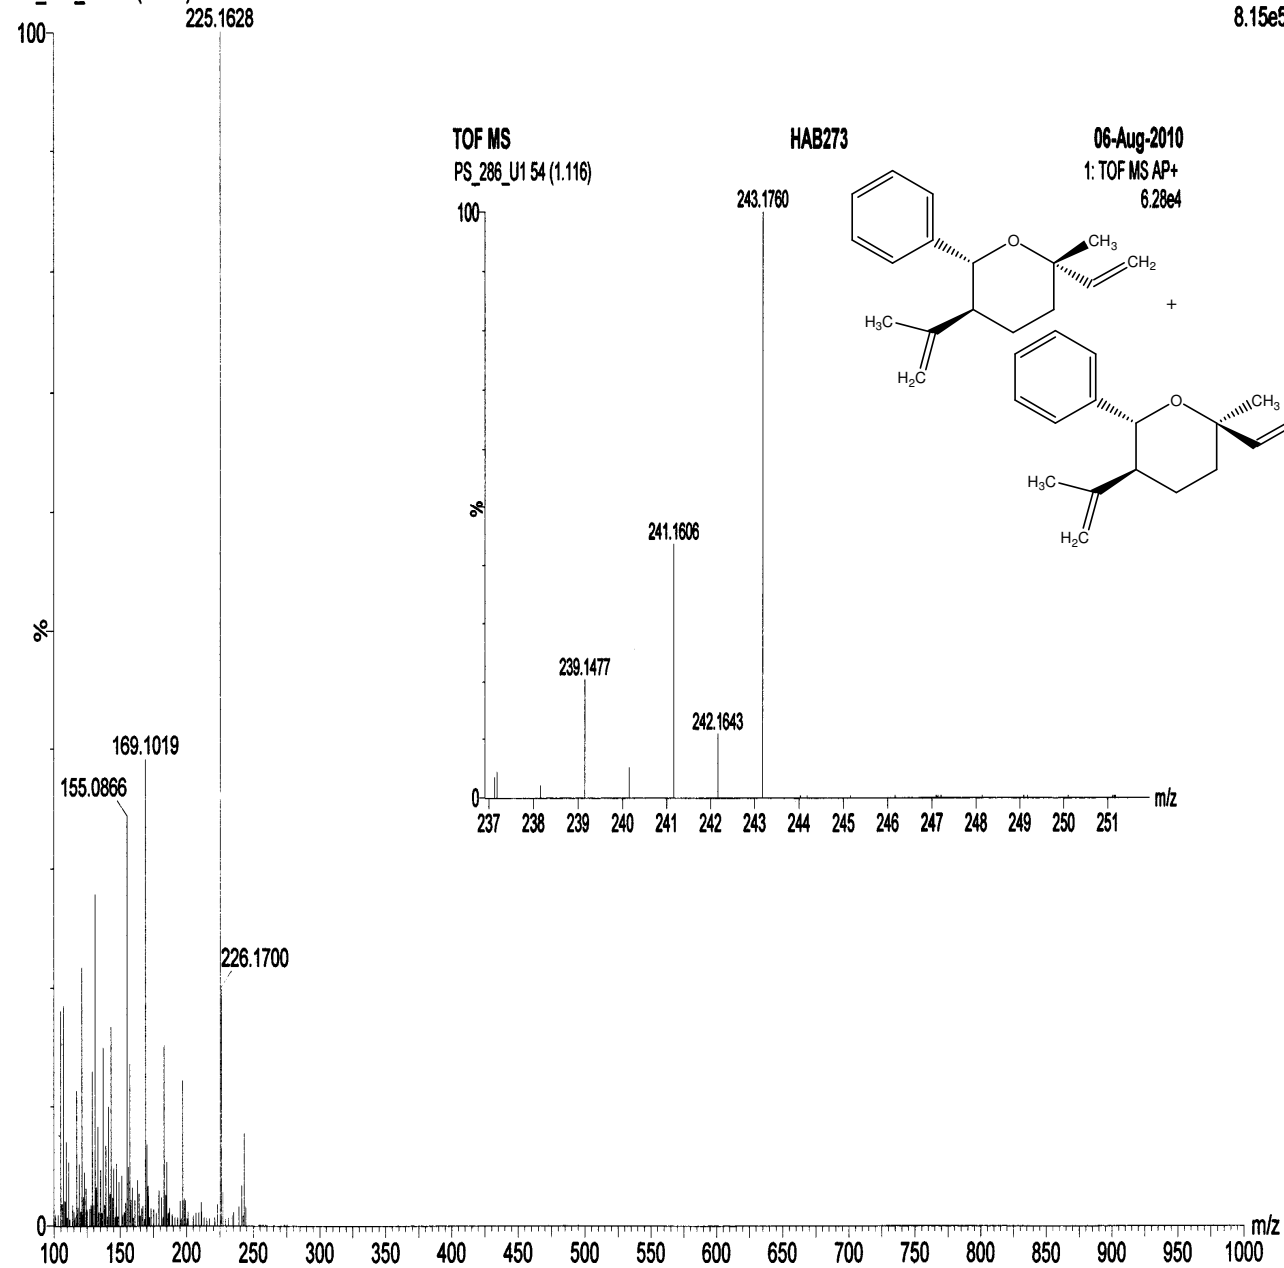

HAB273

06-Aug-2010

1: TOF MS AP+

8.15e5

TOF MS

PS\_286\_U1 54 (1.116)

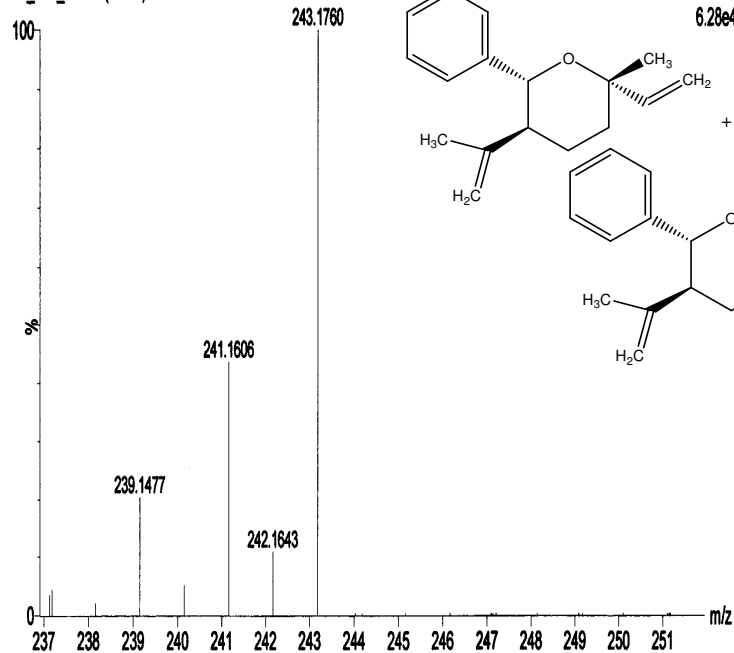

HRMS spectrum of 4a & 5a

TOF MS

PS\_299\_M1 42 (0.884)

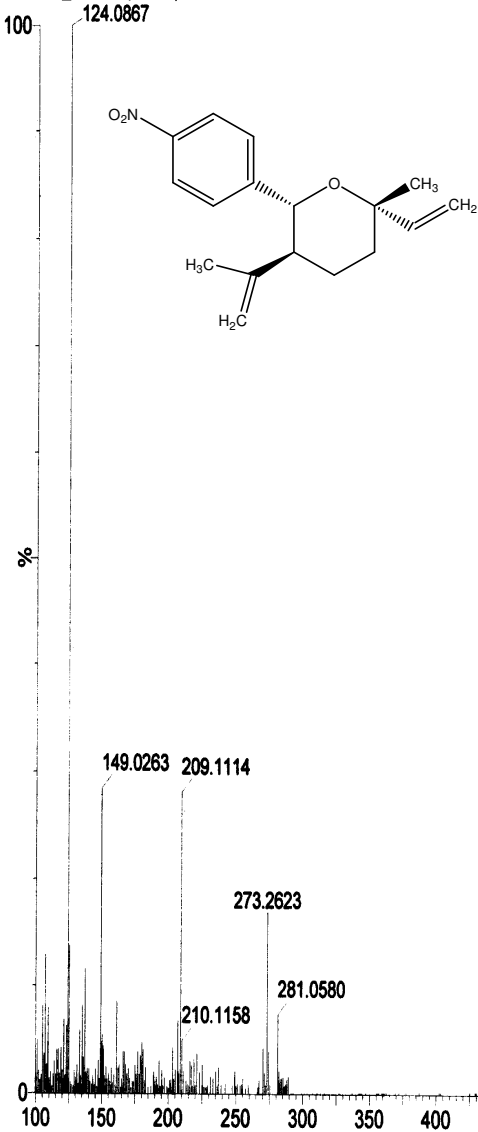

HAB273

20-Aug-2010  
1: TOF MS AP+  
2.94e4

TOF MS

PS\_299\_M1 42 (0.884)

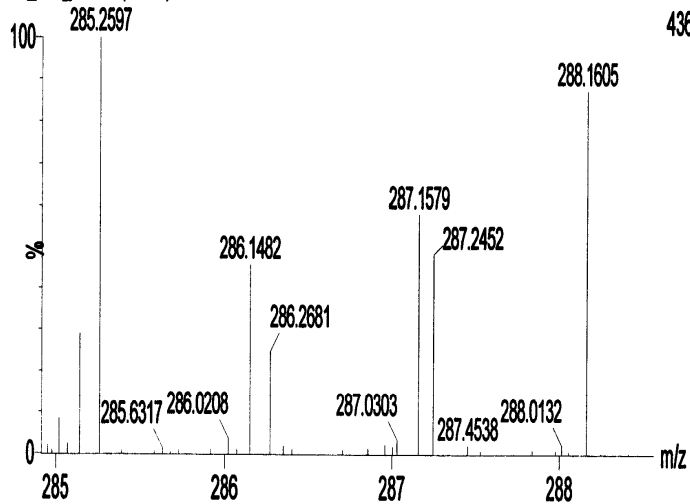

20-Aug-2010  
1: TOF MS AP+  
436

HRMS spectrum of 4e

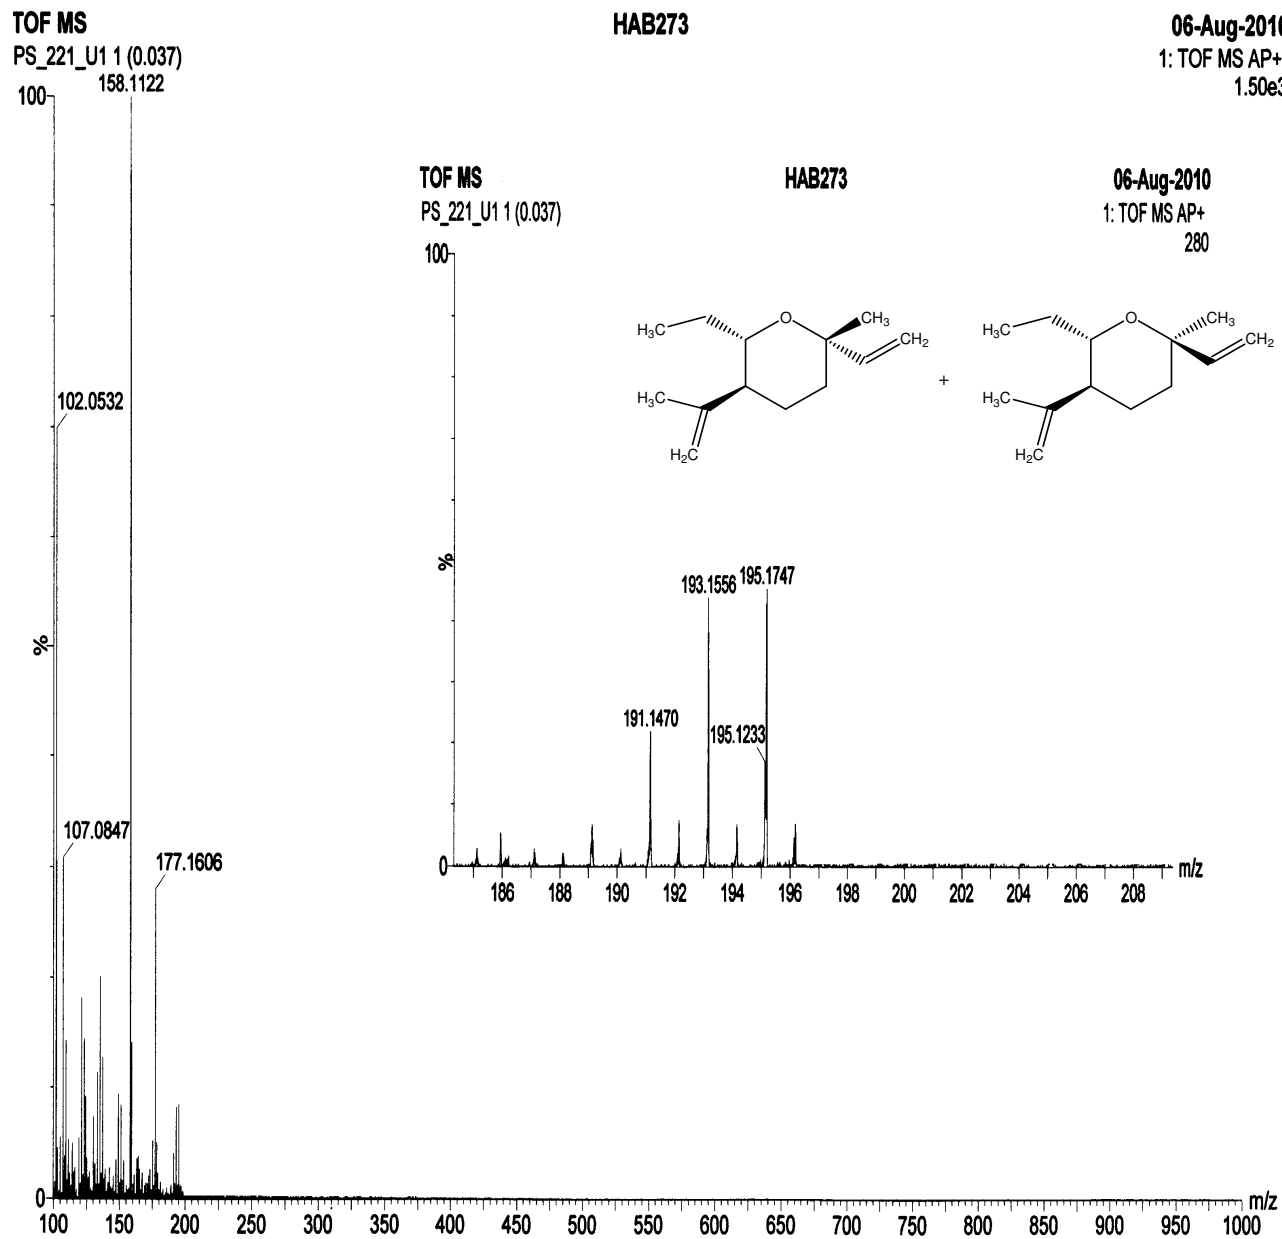

HRMS spectrum of 4n & 5n

TOF MS

PS\_299\_U 49 (1.025)

HAB273

09-Aug-2010

1: TOF MS AP+

7.61e4

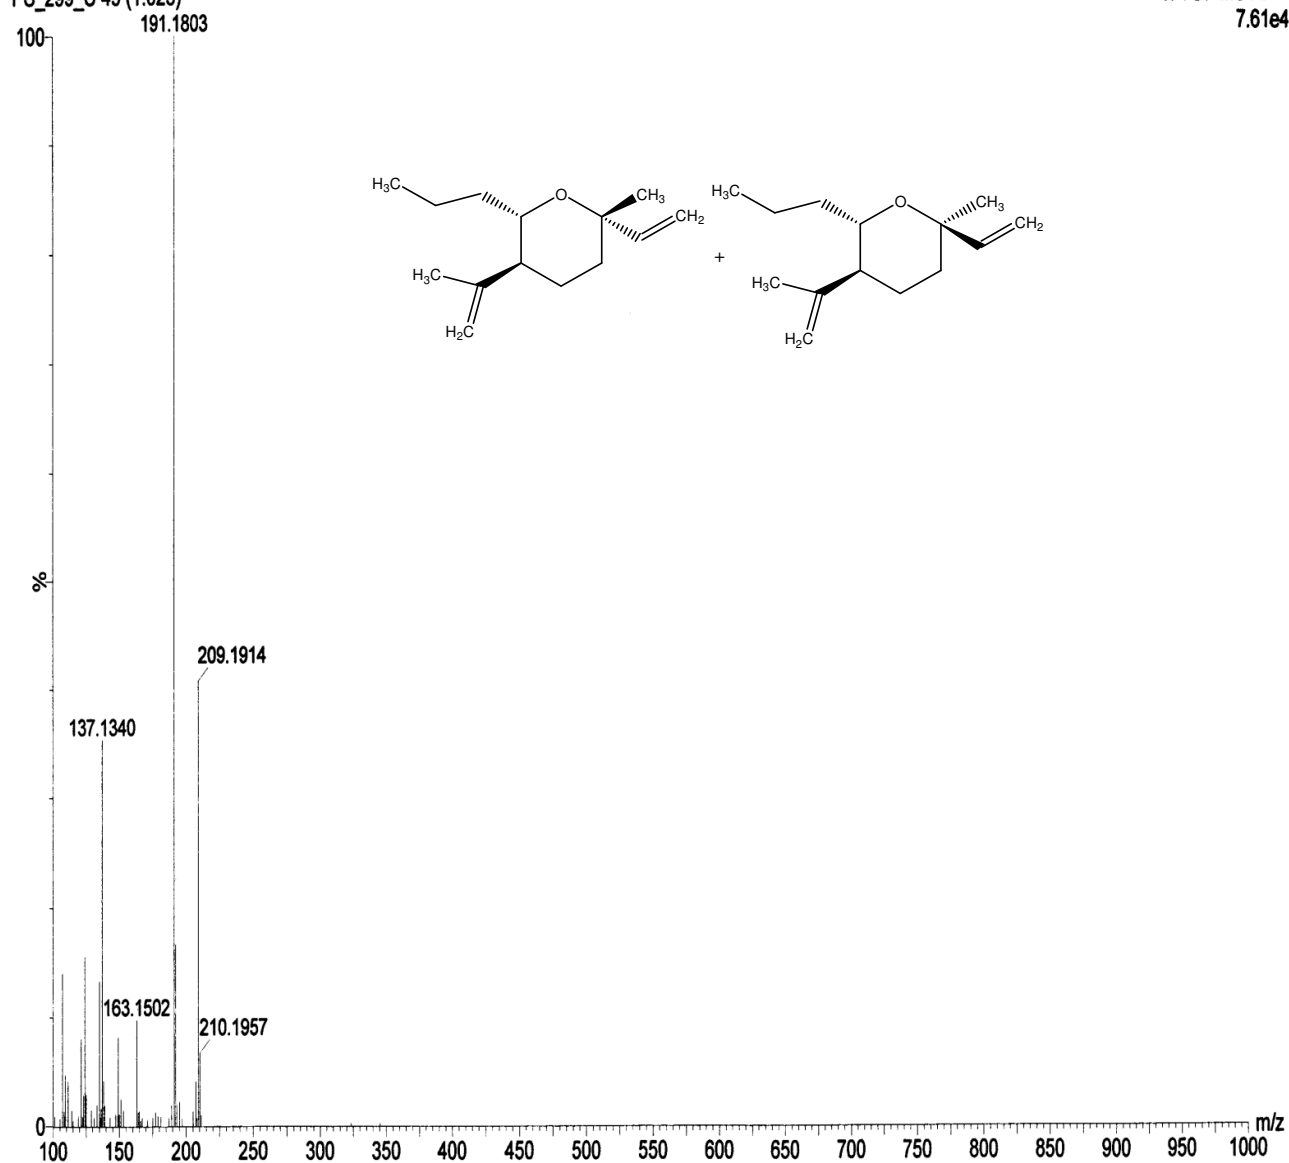

HRMS spectrum of 4o & 5o

TOF MS

PS\_188\_U 57 (1.189)

HAB273

05-Aug-2010

1: TOF MS AP+

1.65e4

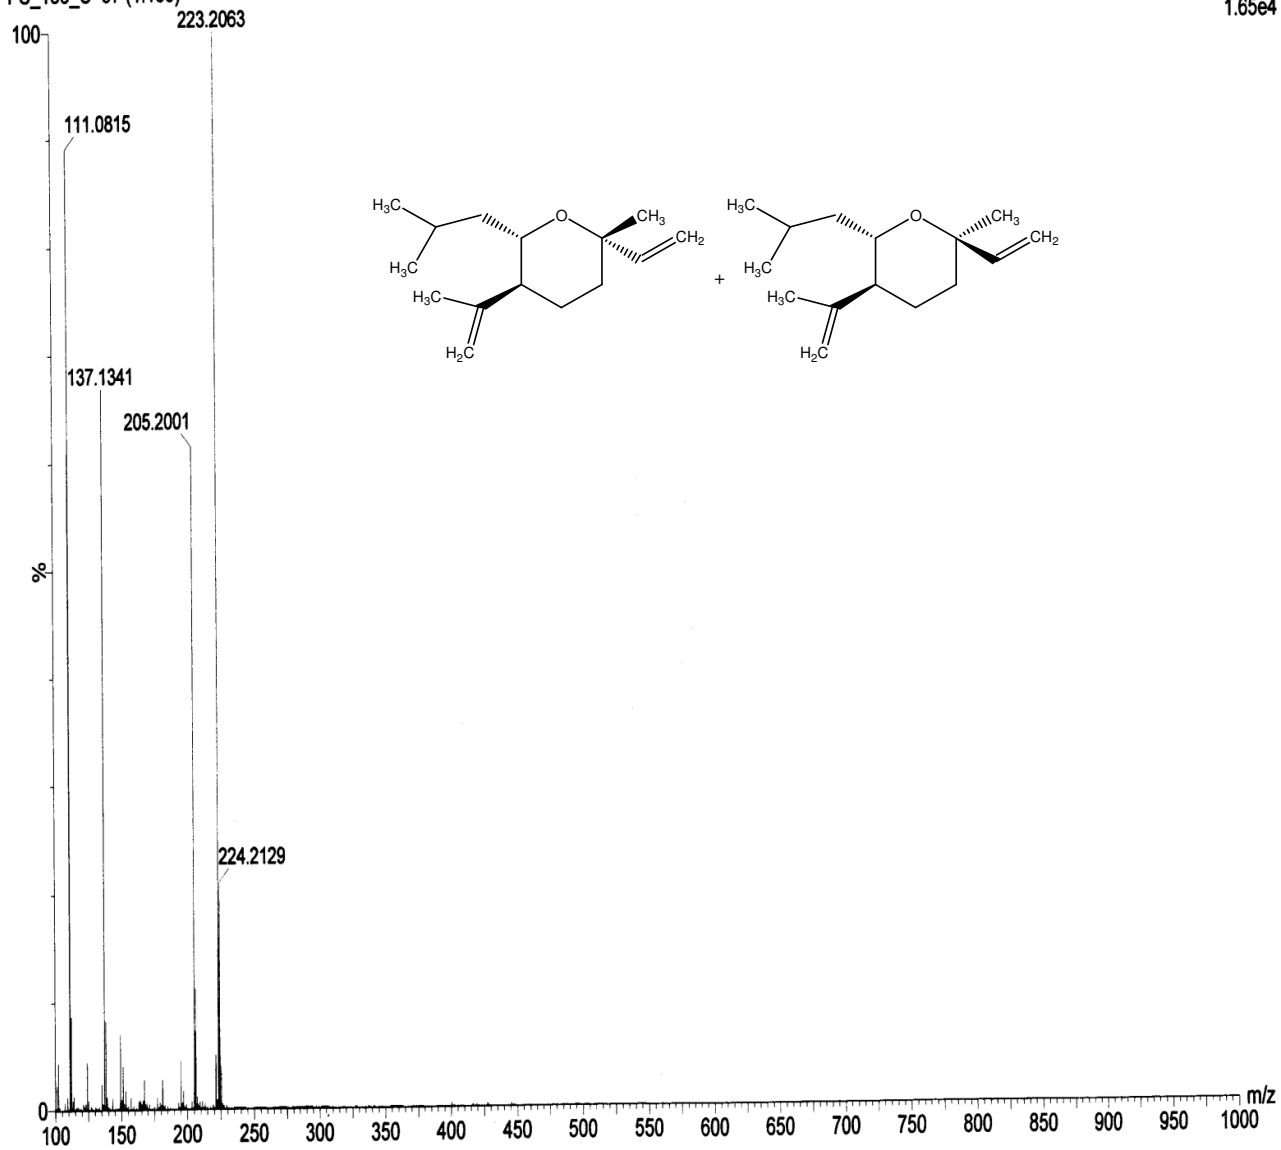

HRMS spectrum of 4p & 5p



TOF MS

PS 302 U 25 (0.534)

HAB273

09-Aug-2010

1: TOF MS AP+

2.92e3

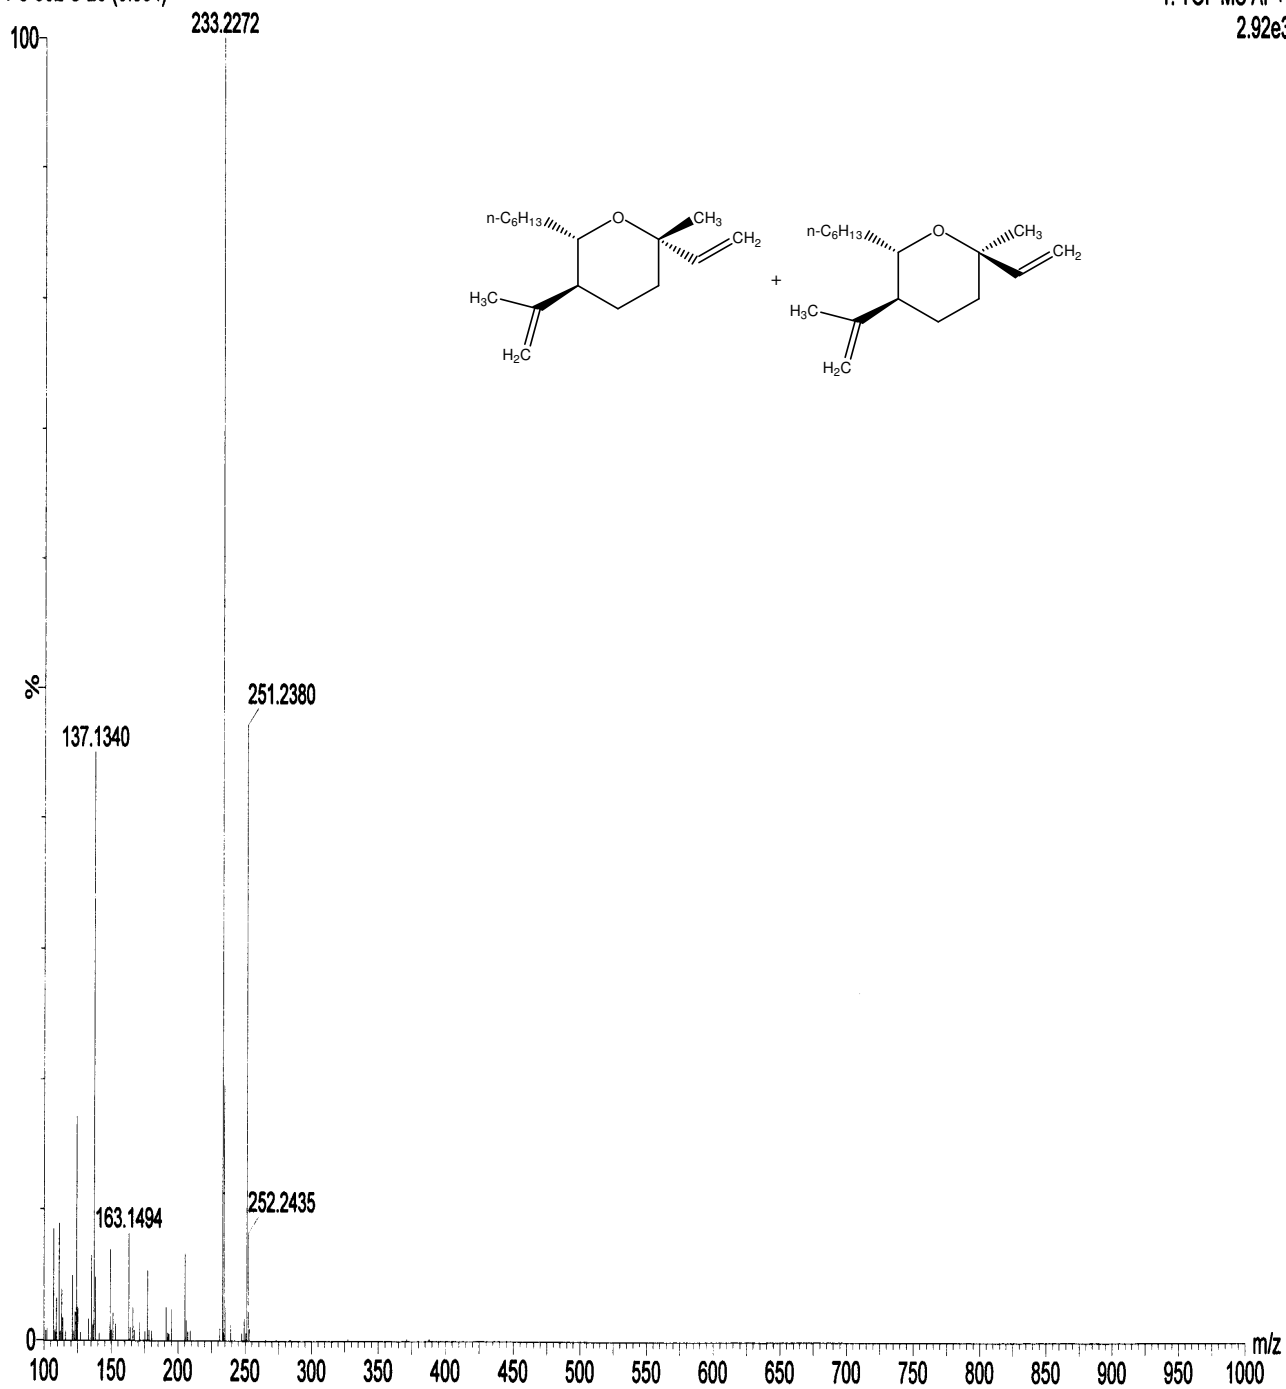

HRMS spectrum of 4q & 5q

TOF MS

PS\_304\_U3 48 (0.994)

124.0873

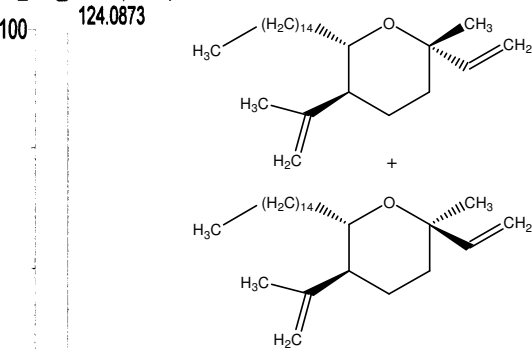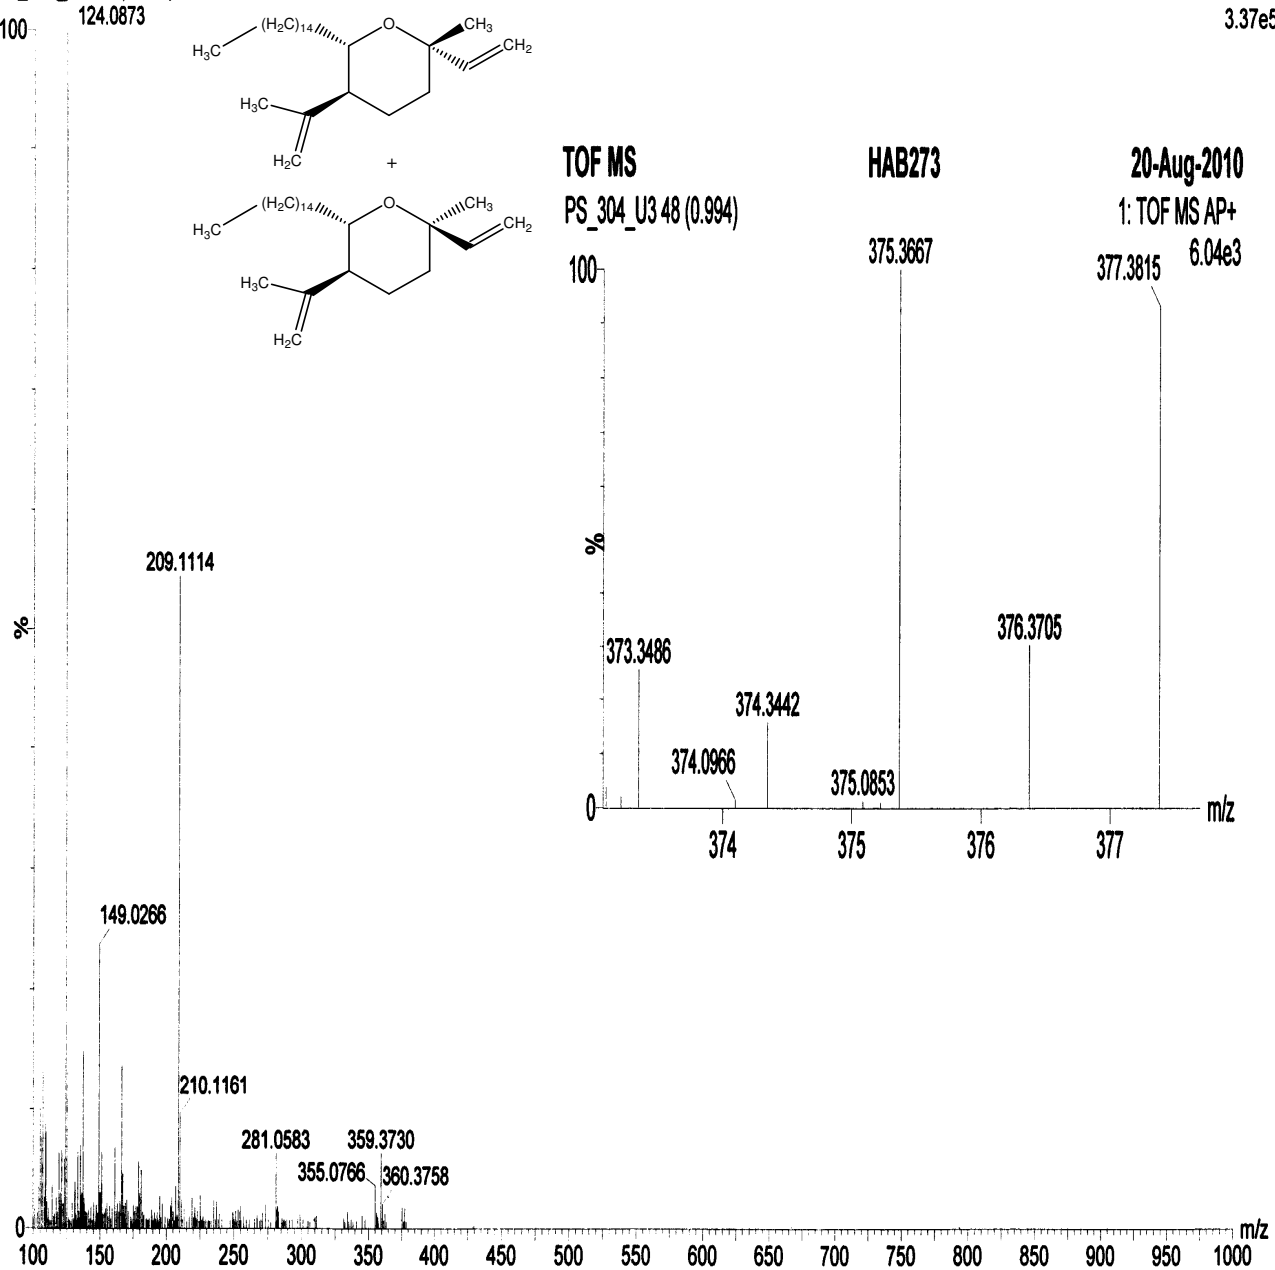

HAB273

20-Aug-2010

1: TOF MS AP+  
3.37e5

TOF MS

PS\_304\_U3 48 (0.994)

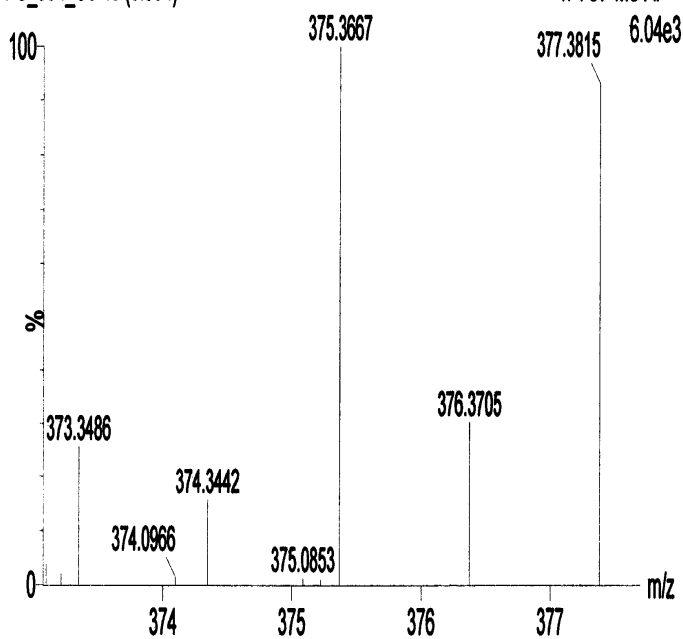

HRMS spectrum of 4r & 5r

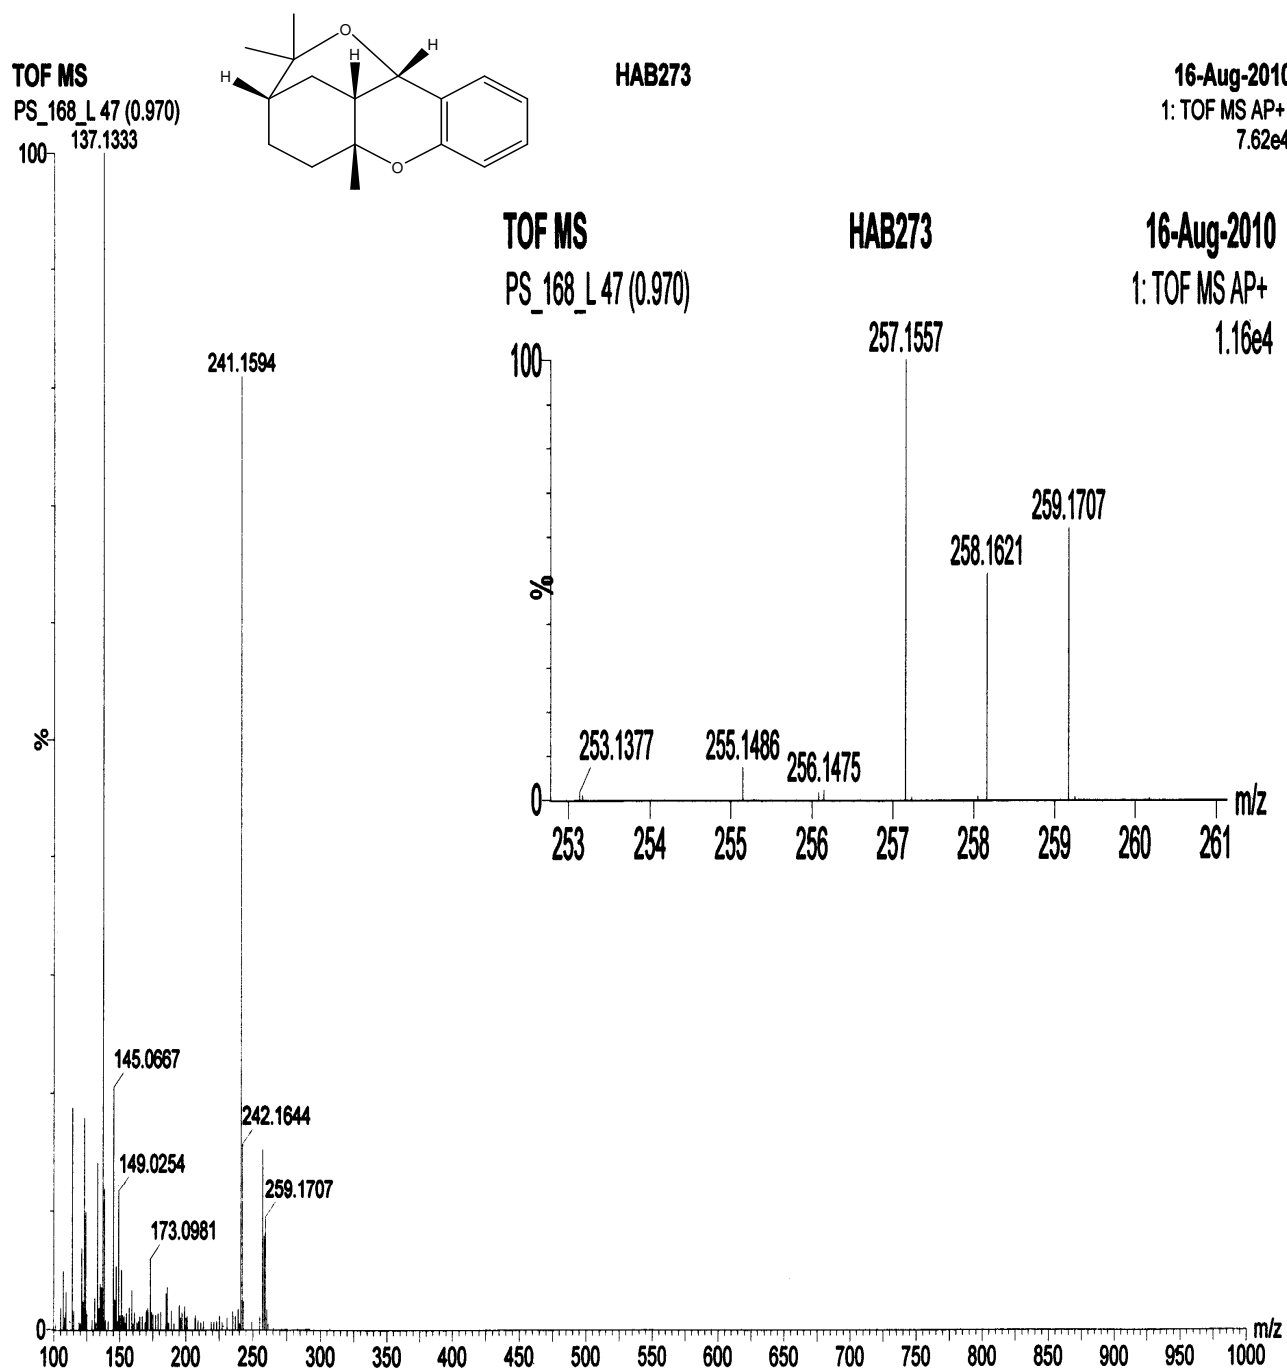

HRMS spectrum of 15

TOF MS

PS\_314\_U 56 (1.153)

137.1349

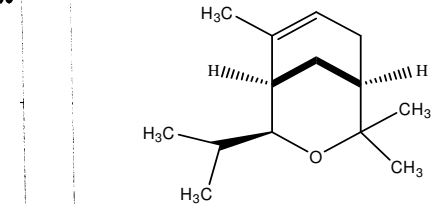

%

138.1399

151.1160

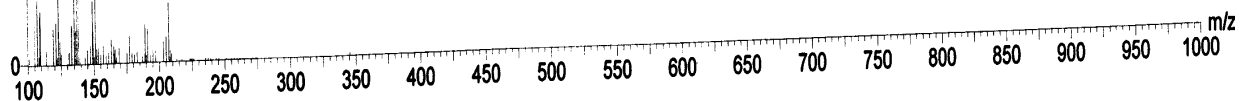

HRMS spectrum of 17b

HAB273

18-Aug-2010

1: TOF MS AP+  
6.93e4

TOF MS

PS\_314\_U 56 (1.153)

100

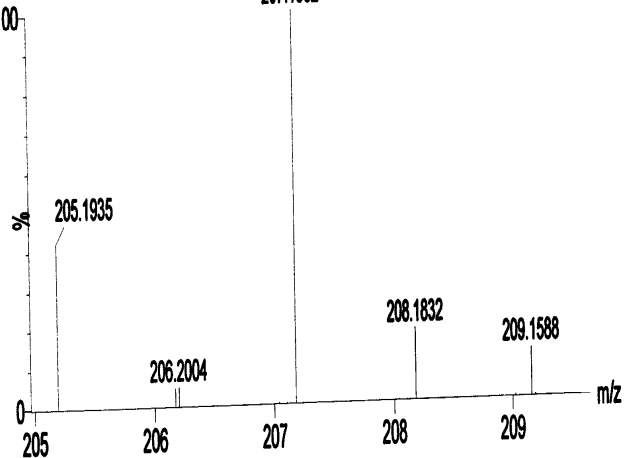

HAB273

18-Aug-2010

1: TOF MS AP+  
3.70e3

TOF MS

PS\_307\_U 21 (0.439)

HAB273

18-Aug-2010

1: TOF MS AP+  
5.48e3

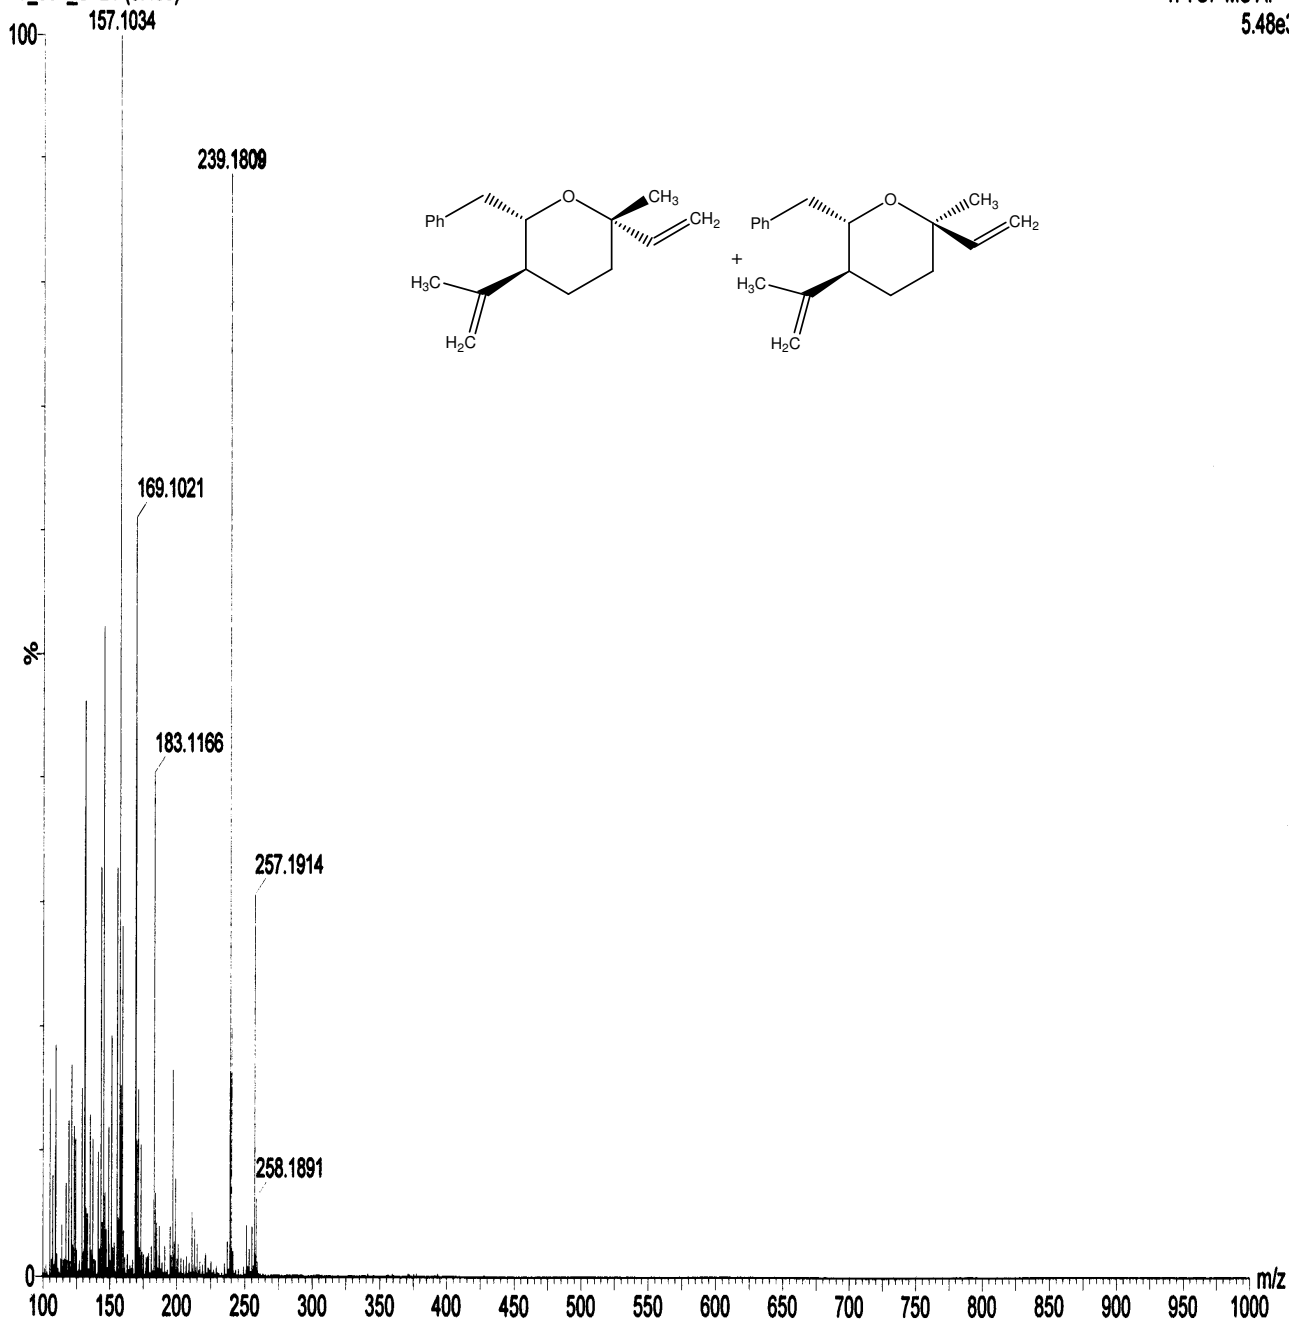

HRMS spectrum of 18c & 19c

**TOF MS**

PS\_308\_M2 32 (0.663)

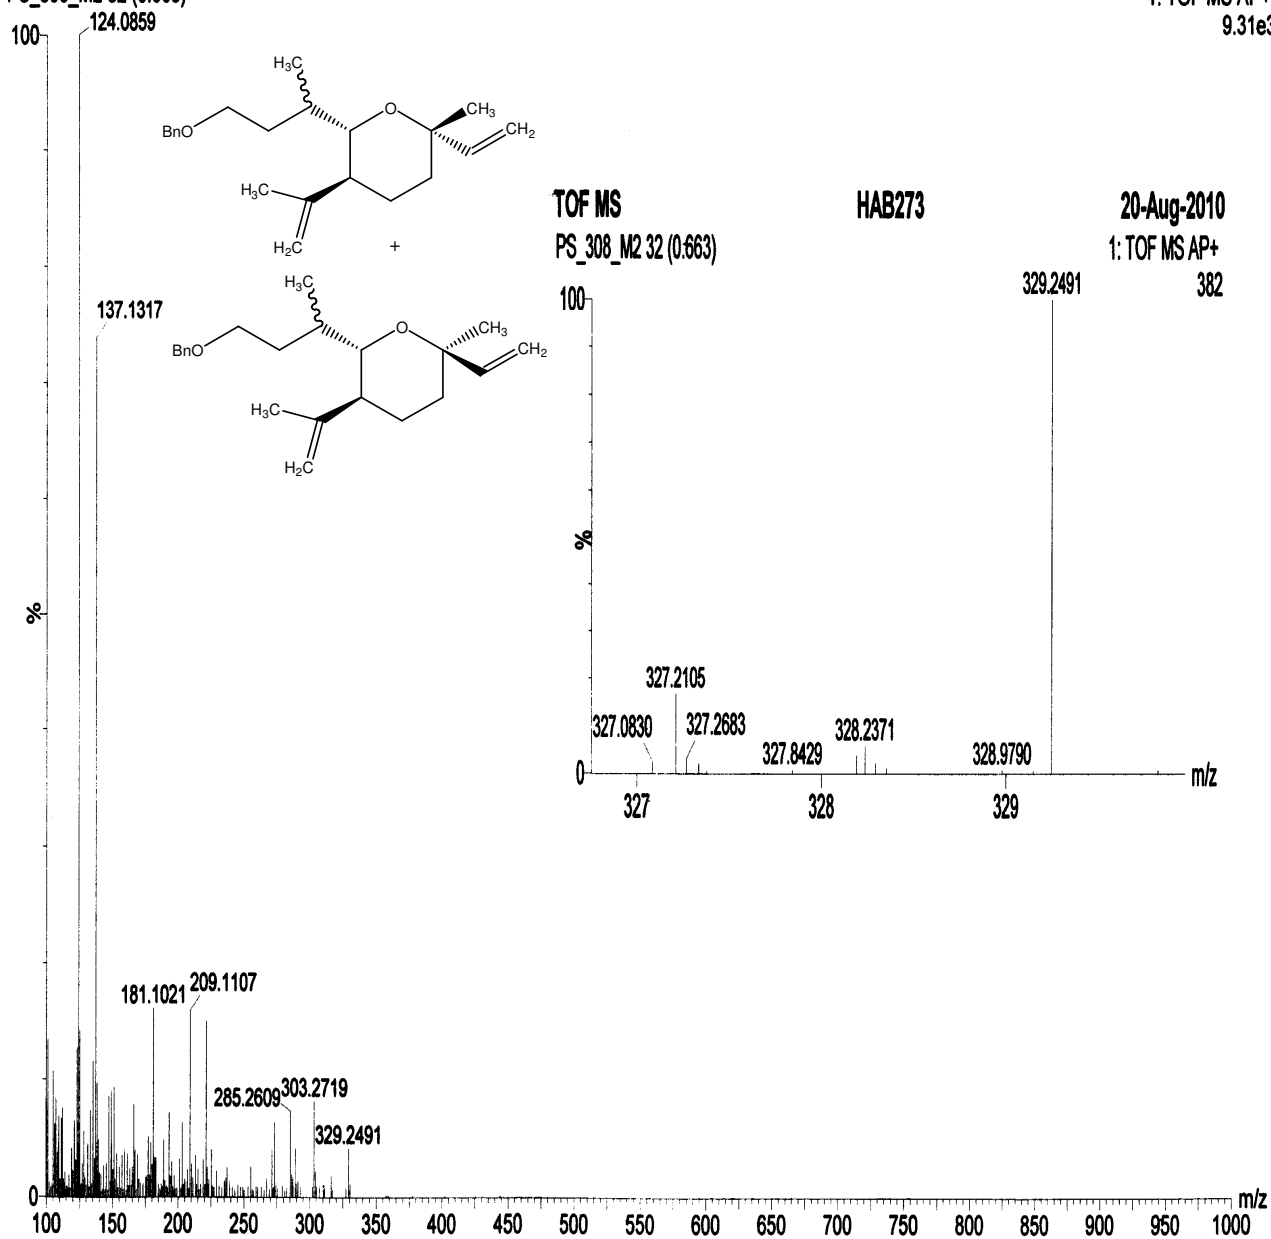

**HRMS spectrum of 18d & 19d**

TOF MS

PS\_368M 43 (0.902)

HAB273

07-Oct-2010

1: TOF MS AP+

1.43e5

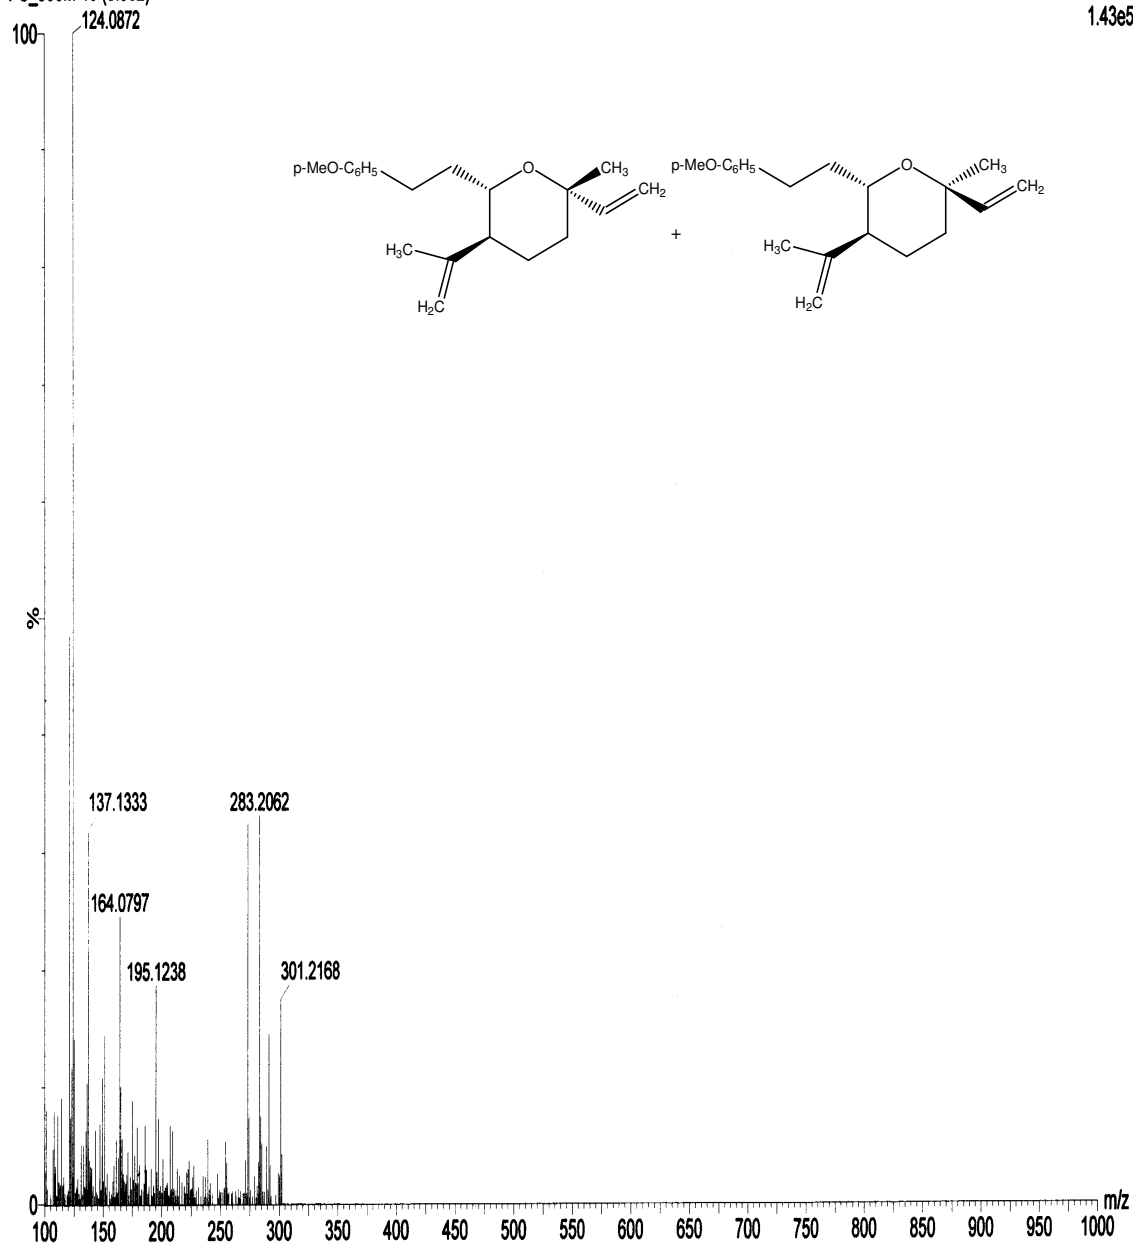

HRMS spectrum of 18e & 19e

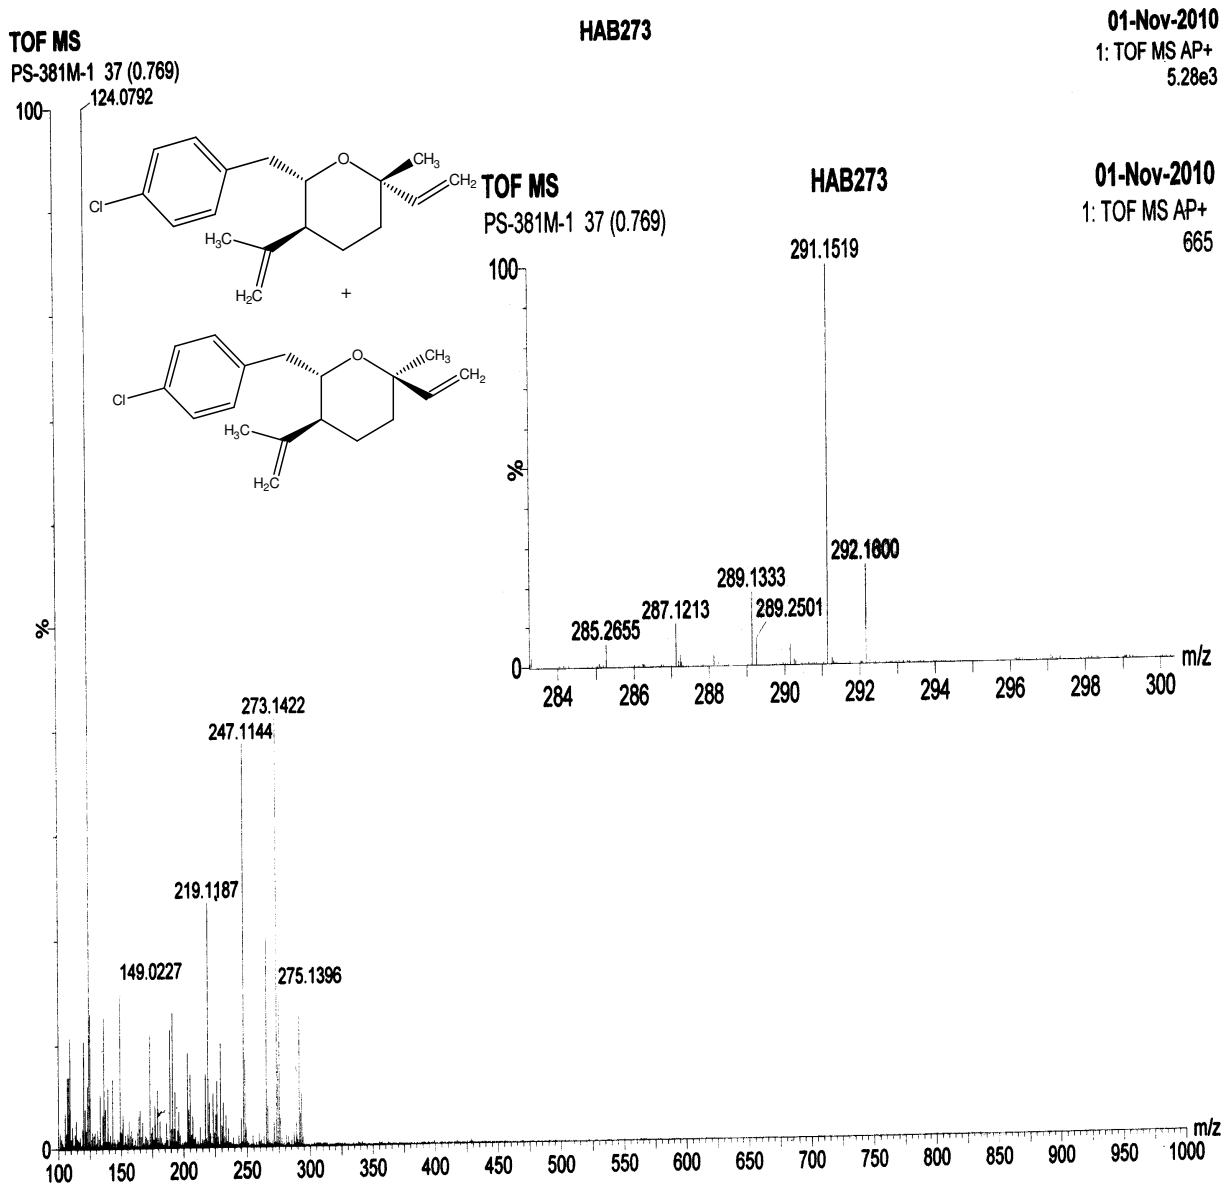

HRMS spectrum of 18f & 19f



TOF MS

PS-439M 4 (0.068)

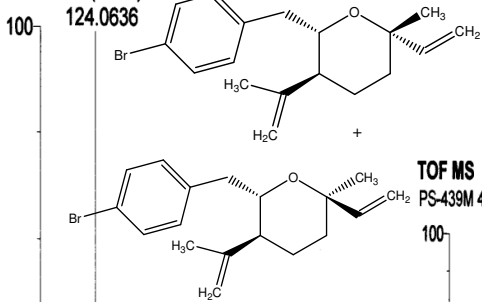

HAB273

24-Jan-2011

TOF MS AP+

1.65e4

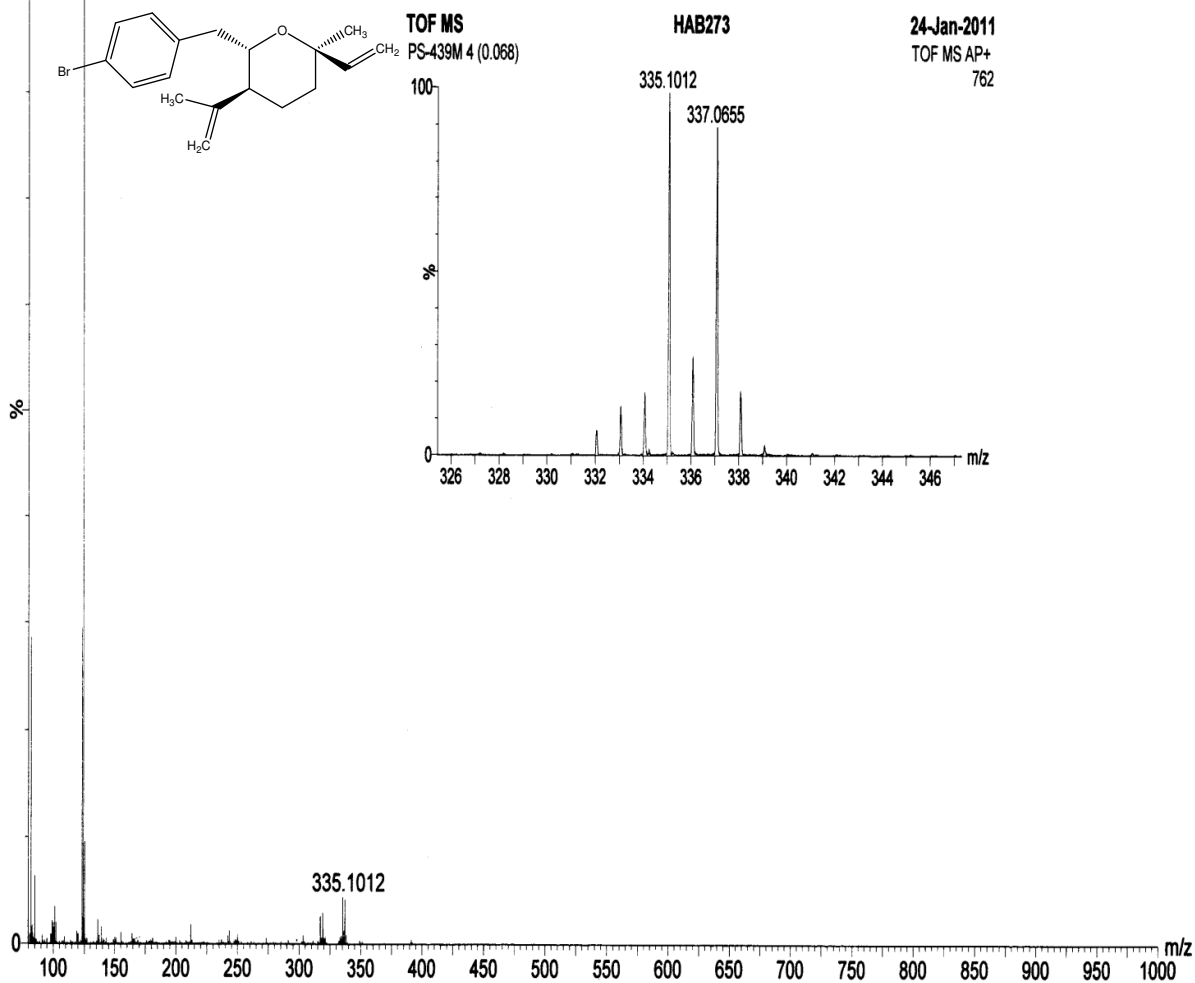

HRMS spectrum of 18g & 19g
